# Supplementary material for: A “click-chemistry” approach for the synthesis of porphyrin dyads as sensitizers for dye-sensitized solar cells
Source: Royal Society of Chemistry journal article supplement (doi:10.1039/c4dt03194f), 2014-11-19
Supplement: c4dt03194f1.pdf [file c4dt03194f1.pdf]

## Supporting Information

for

# “Click-chemistry” approach for the synthesis of porphyrin dyads as sensitizers for dye- sensitized solar cells

*Vasilis Nikolaou,<sup>†</sup> Panagiotis A. Angaridis,<sup>§</sup> Georgios Charalambidis,<sup>†</sup> Ganesh D.*

*Sharma,<sup>\*,‡</sup> and Athanassios G. Coutsolelos<sup>\*,†</sup>*

<sup>†</sup> Department of Chemistry, University of Crete, Laboratory of Bioinorganic  
Chemistry, Voutes Campus, P.O. Box 2208, 71003, Heraklion, Crete, Greece

<sup>§</sup> Department of Chemistry, Aristotle University of Thessaloniki, Thessaloniki, 54124,  
Greece

<sup>‡</sup> R&D Center for Engineering and Science, JEC group of Colleges, Jaipur  
Engineering College campus, Kukas, Jaipur (Raj.) 303101, India

## Table of contents

|                                                                                              |      |
|----------------------------------------------------------------------------------------------|------|
| <u>Figure S1</u> : $^1\text{H}$ NMR spectrum of <b>3</b> .....                               | S-4  |
| <u>Figure S2</u> : Focus on aromatic region of $^1\text{H}$ NMR spectrum of <b>3</b> .....   | S-5  |
| <u>Figure S3</u> : $^{13}\text{C}$ NMR spectrum of <b>3</b> .....                            | S-6  |
| <u>Figure S4</u> : Focus on $^{13}\text{C}$ NMR spectrum of <b>3</b> .....                   | S-7  |
| <u>Figure S5</u> : $^1\text{H}$ NMR spectrum of <b>4</b> .....                               | S-8  |
| <u>Figure S6</u> : Focus on aromatic region of $^1\text{H}$ NMR spectrum of <b>4</b> .....   | S-9  |
| <u>Figure S7</u> : $^{13}\text{C}$ NMR spectrum of <b>4</b> .....                            | S-10 |
| <u>Figure S8</u> : Focus on $^{13}\text{C}$ NMR spectrum of <b>4</b> .....                   | S-11 |
| <u>Figure S9</u> : $^1\text{H}$ NMR spectrum of <b>5</b> .....                               | S-12 |
| <u>Figure S10</u> : Focus on aromatic region of $^1\text{H}$ NMR spectrum of <b>5</b> .....  | S-13 |
| <u>Figure S11</u> : $^{13}\text{C}$ NMR spectrum of <b>5</b> .....                           | S-14 |
| <u>Figure S12</u> : Focus on $^{13}\text{C}$ NMR spectrum of <b>5</b> .....                  | S-15 |
| <u>Figure S13</u> : $^1\text{H}$ NMR spectrum of <b>6</b> .....                              | S-16 |
| <u>Figure S14</u> : Focus on aromatic region of $^1\text{H}$ NMR spectrum of <b>6</b> .....  | S-17 |
| <u>Figure S15</u> : $^{13}\text{C}$ NMR spectrum of <b>6</b> .....                           | S-18 |
| <u>Figure S16</u> : Focus on $^{13}\text{C}$ NMR spectrum of <b>6</b> .....                  | S-19 |
| <u>Figure S17</u> : $^1\text{H}$ NMR spectrum of <b>8</b> .....                              | S-20 |
| <u>Figure S18</u> : Focus on aromatic region of $^1\text{H}$ NMR spectrum of <b>8</b> .....  | S-21 |
| <u>Figure S19</u> : $^{13}\text{C}$ NMR spectrum of <b>8</b> .....                           | S-22 |
| <u>Figure S20</u> : Focus on $^{13}\text{C}$ NMR spectrum of <b>8</b> .....                  | S-23 |
| <u>Figure S21</u> : $^1\text{H}$ NMR spectrum of <b>9</b> .....                              | S-24 |
| <u>Figure S22</u> : Focus on aromatic region of $^1\text{H}$ NMR spectrum of <b>9</b> .....  | S-25 |
| <u>Figure S23</u> : $^{13}\text{C}$ NMR spectrum of <b>9</b> .....                           | S-26 |
| <u>Figure S24</u> : Focus on $^{13}\text{C}$ NMR spectrum of <b>9</b> .....                  | S-27 |
| <u>Figure S25</u> : $^1\text{H}$ NMR spectrum of <b>10</b> .....                             | S-28 |
| <u>Figure S26</u> : Focus on aromatic region of $^1\text{H}$ NMR spectrum of <b>10</b> ..... | S-29 |
| <u>Figure S27</u> : $^{13}\text{C}$ NMR spectrum of <b>10</b> .....                          | S-30 |
| <u>Figure S28</u> : Focus on $^{13}\text{C}$ NMR spectrum of <b>10</b> .....                 | S-31 |
| <u>Figure S29</u> : $^1\text{H}$ NMR spectrum of <b>11</b> .....                             | S-32 |
| <u>Figure S30</u> : Focus on aromatic region of $^1\text{H}$ NMR spectrum of <b>11</b> ..... | S-33 |
| <u>Figure S31</u> : $^{13}\text{C}$ NMR spectrum of <b>11</b> .....                          | S-34 |

|                                                                                                                    |      |
|--------------------------------------------------------------------------------------------------------------------|------|
| <u>Figure S32</u> : Focus on $^{13}\text{C}$ NMR spectrum of <b>11</b> .....                                       | S-35 |
| <u>Figure S33</u> : Cyclic and square-wave voltammograms of <b>9</b> and <b>11</b> .....                           | S-36 |
| <u>Table S1</u> : Coordinates of gas phase geometry optimized structure of <b>9</b> as<br>calculated by DFT .....  | S-37 |
| <u>Table S2</u> : Coordinates of gas phase geometry optimized structure of <b>11</b> as<br>calculated by DFT ..... | S-42 |

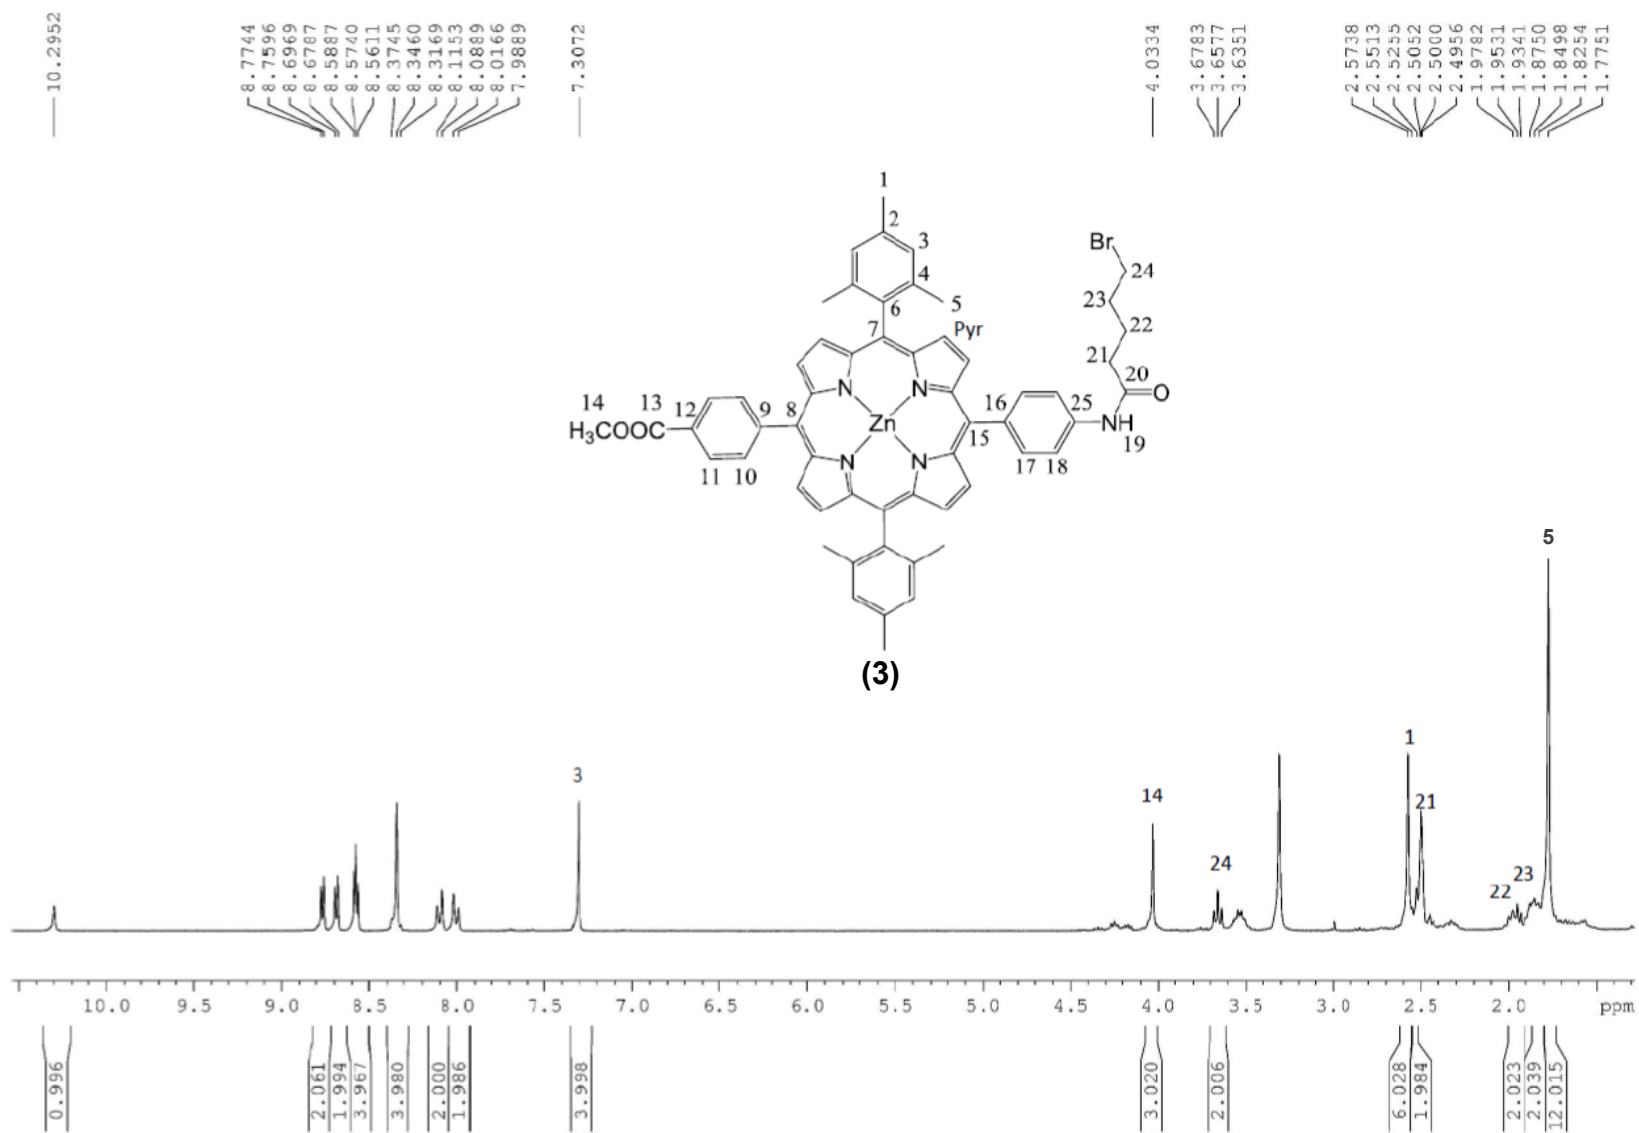

Figure S1: <sup>1</sup>H NMR spectrum of **3** (300MHz, DMSO-d<sub>6</sub>).

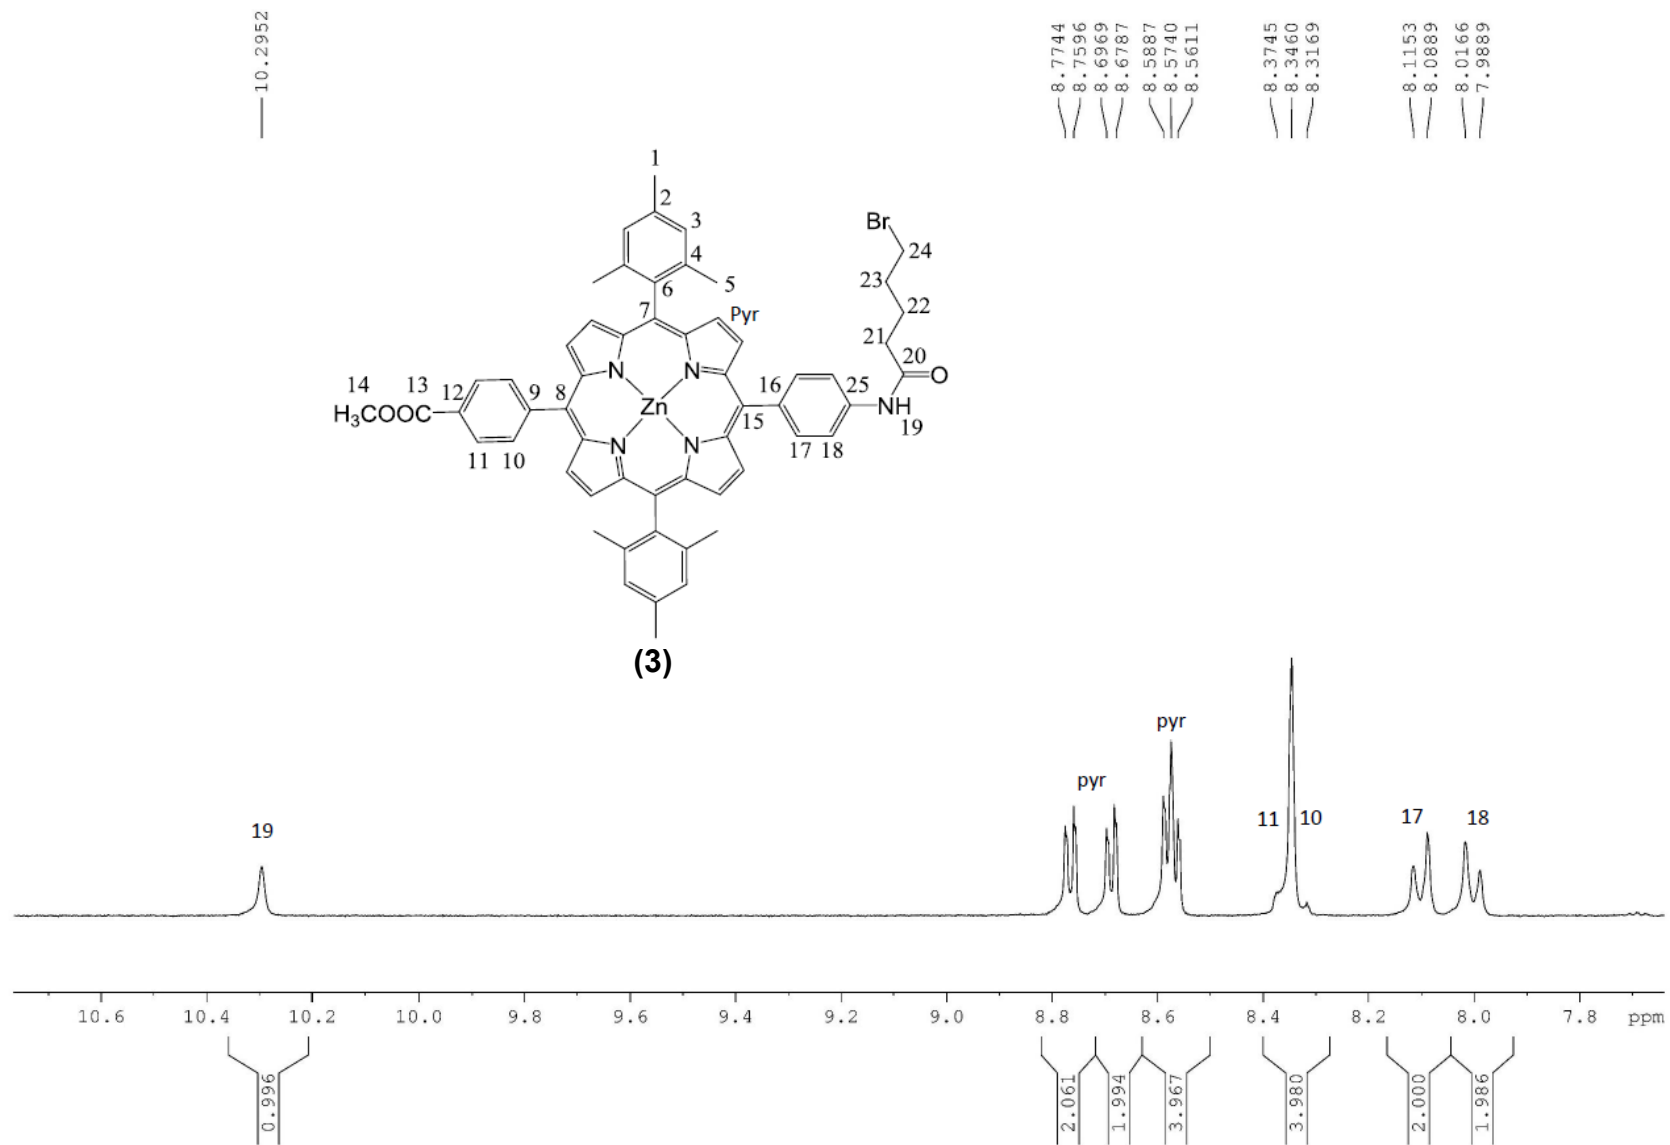

Figure S2: Focus on aromatic region of  $^1\text{H}$  NMR spectrum of **3** (300MHz,  $\text{DMSO-d}_6$ ).

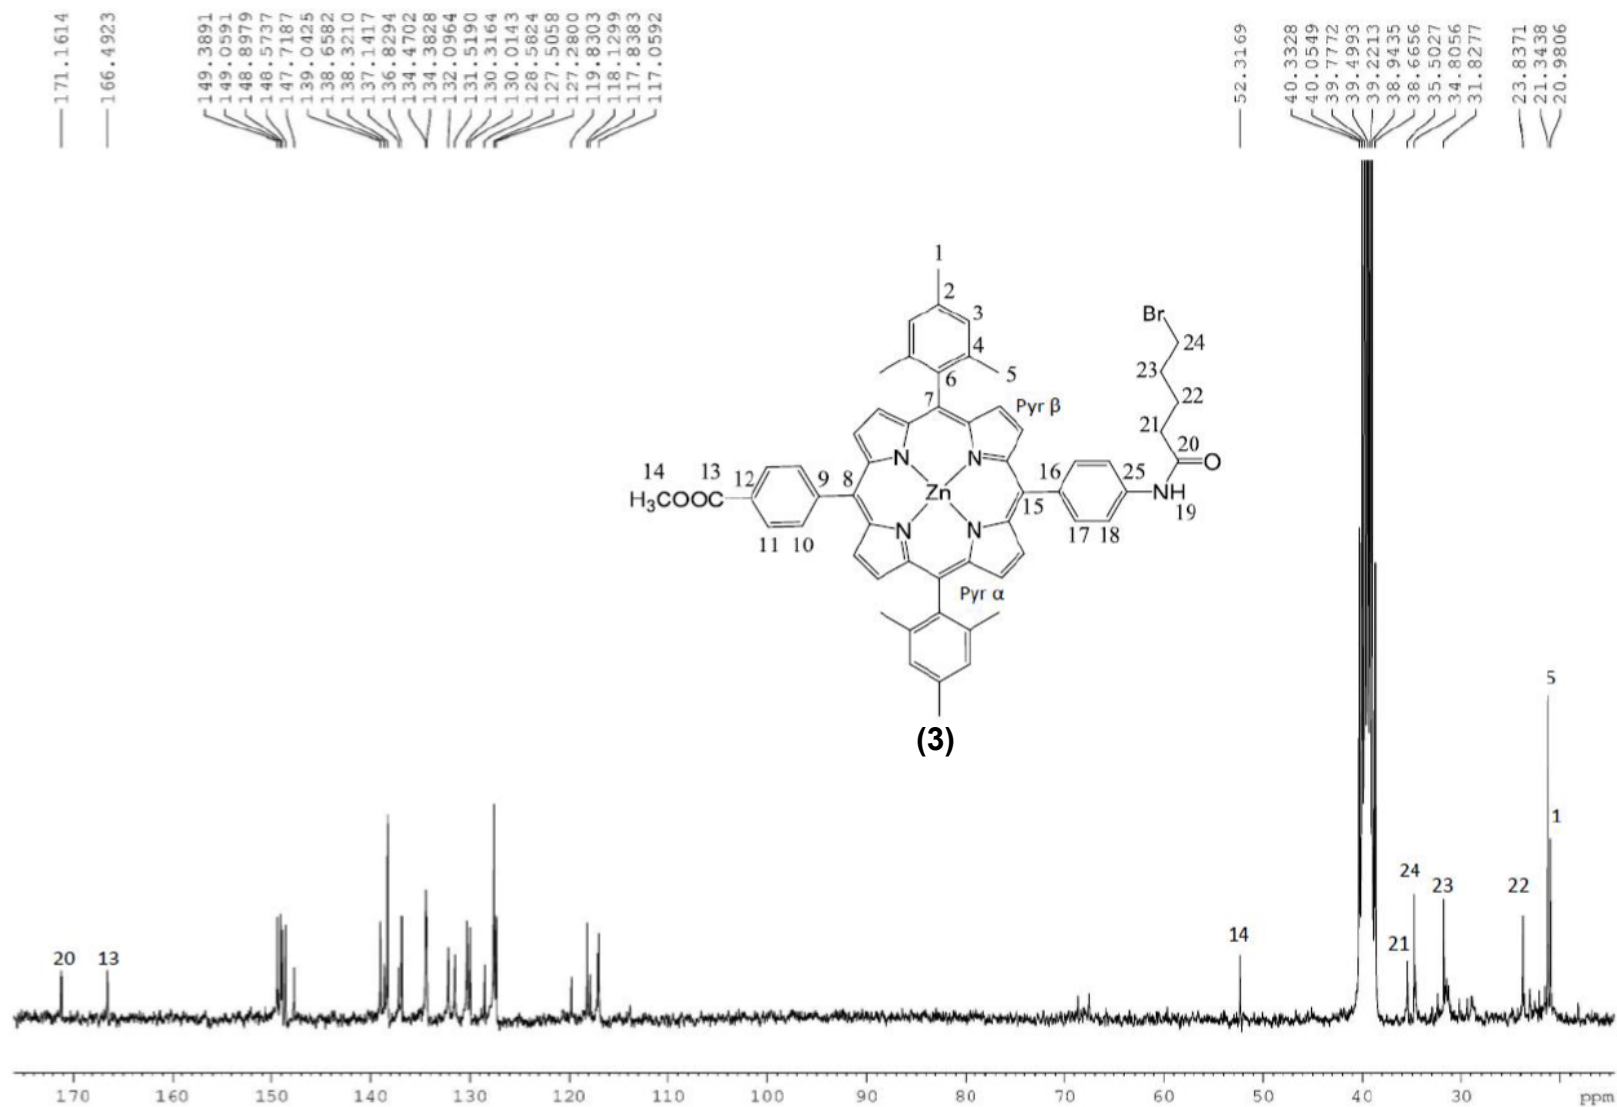

Figure S3: <sup>13</sup>C NMR spectrum of **3** (75MHz, DMSO-d<sub>6</sub>).

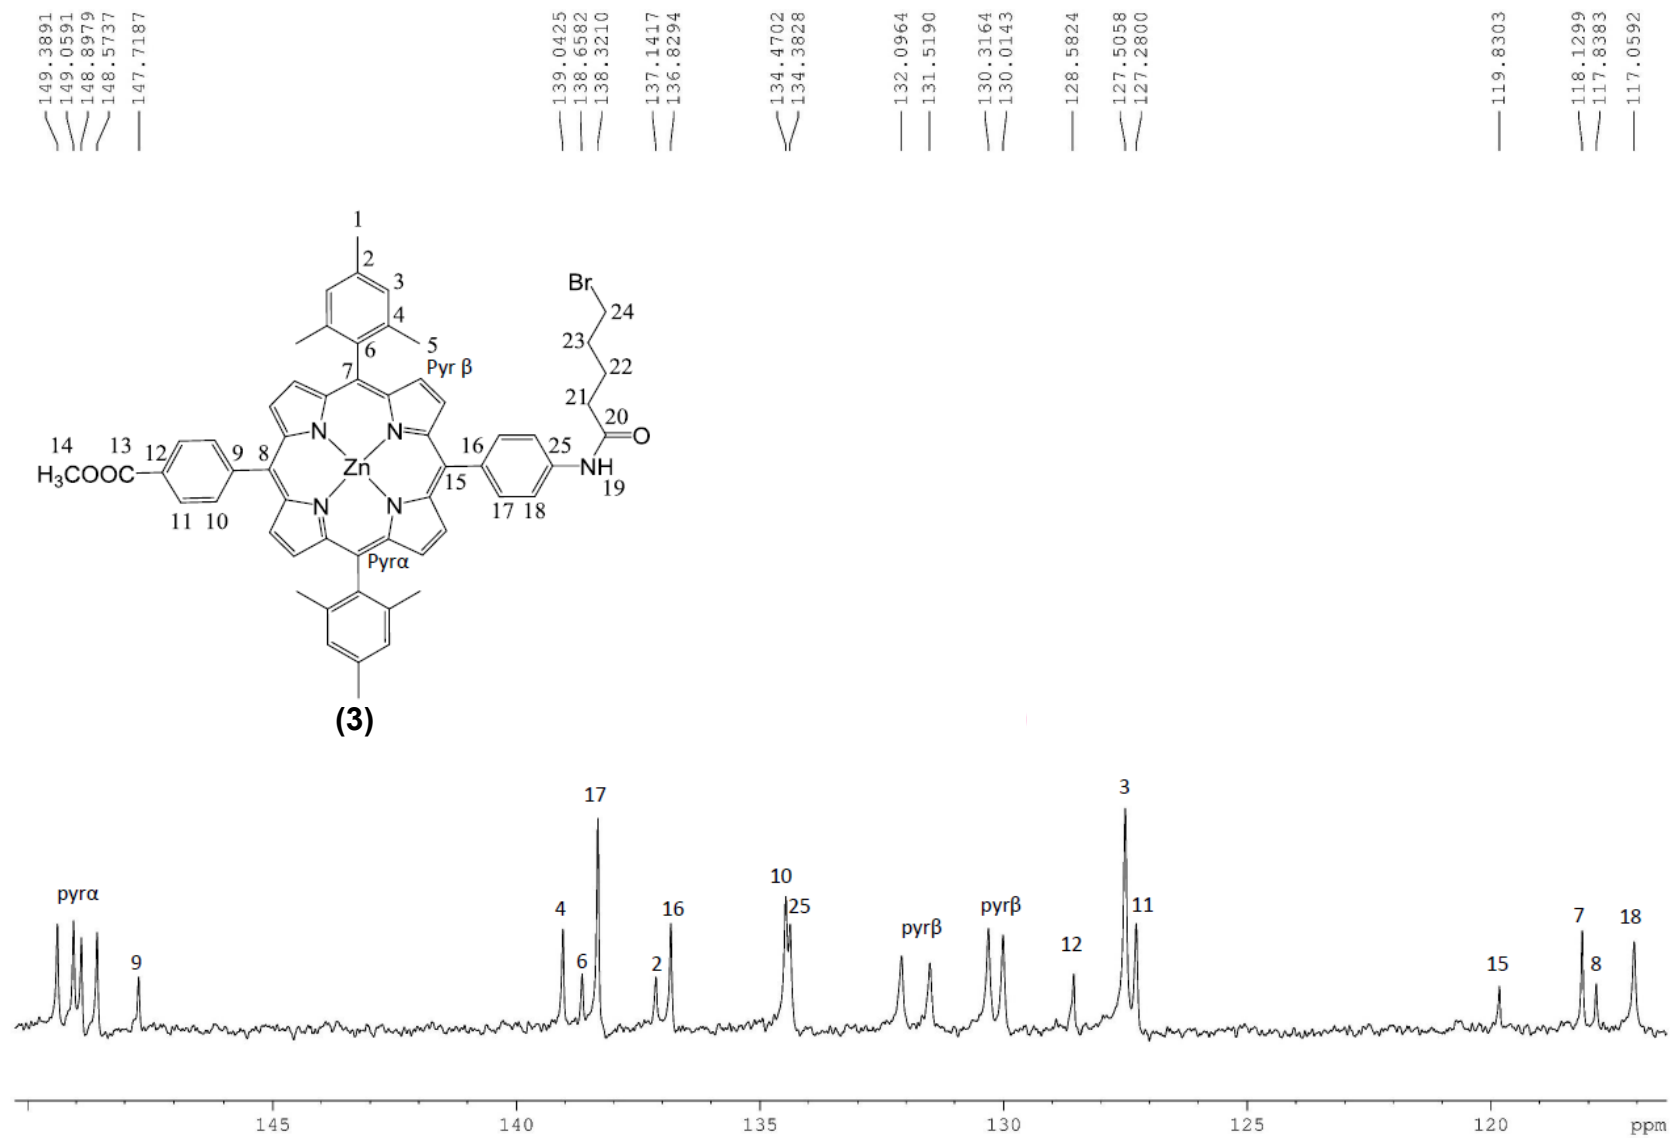

Figure S4: Focus on <sup>13</sup>C NMR spectrum of **3** (75MHz, DMSO-d<sup>6</sup>).

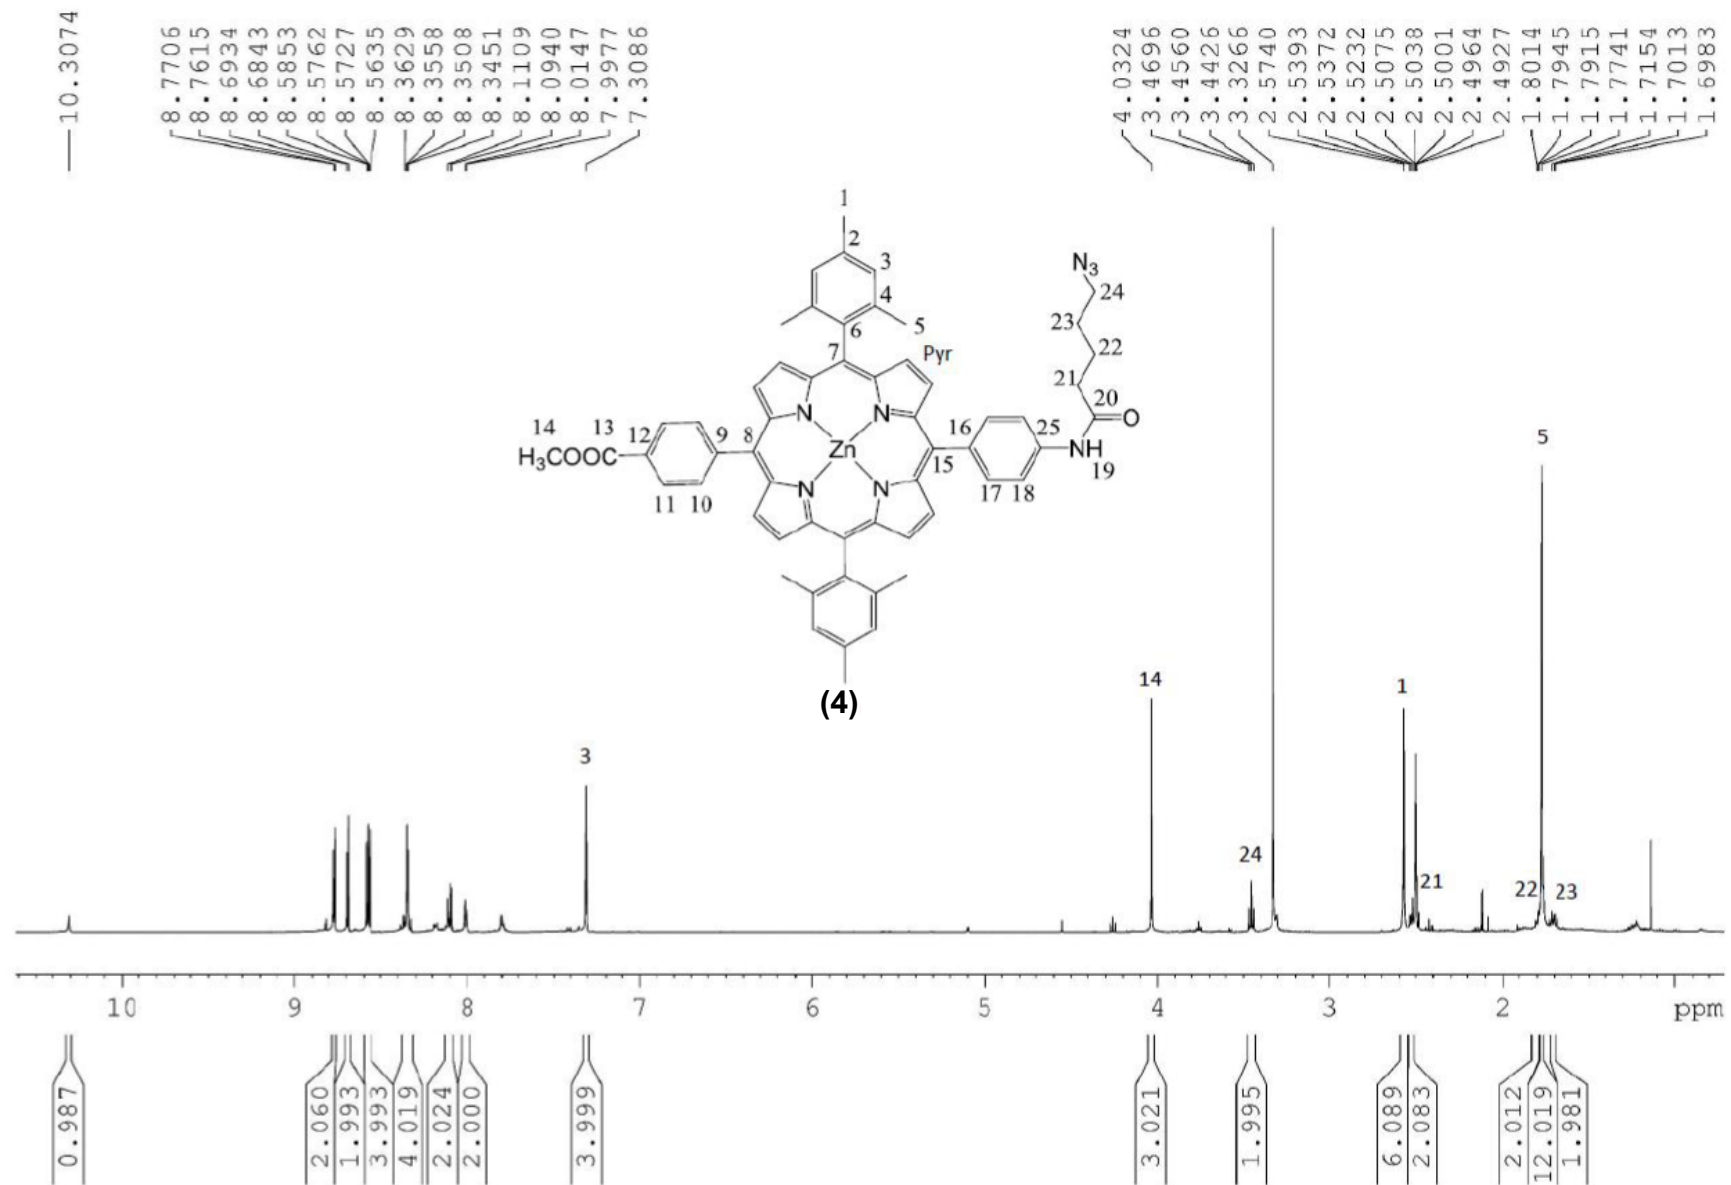

Figure S5:  $^1\text{H}$  NMR spectrum of **4** (500MHz,  $\text{DMSO-d}_6$ ).



—10.3074

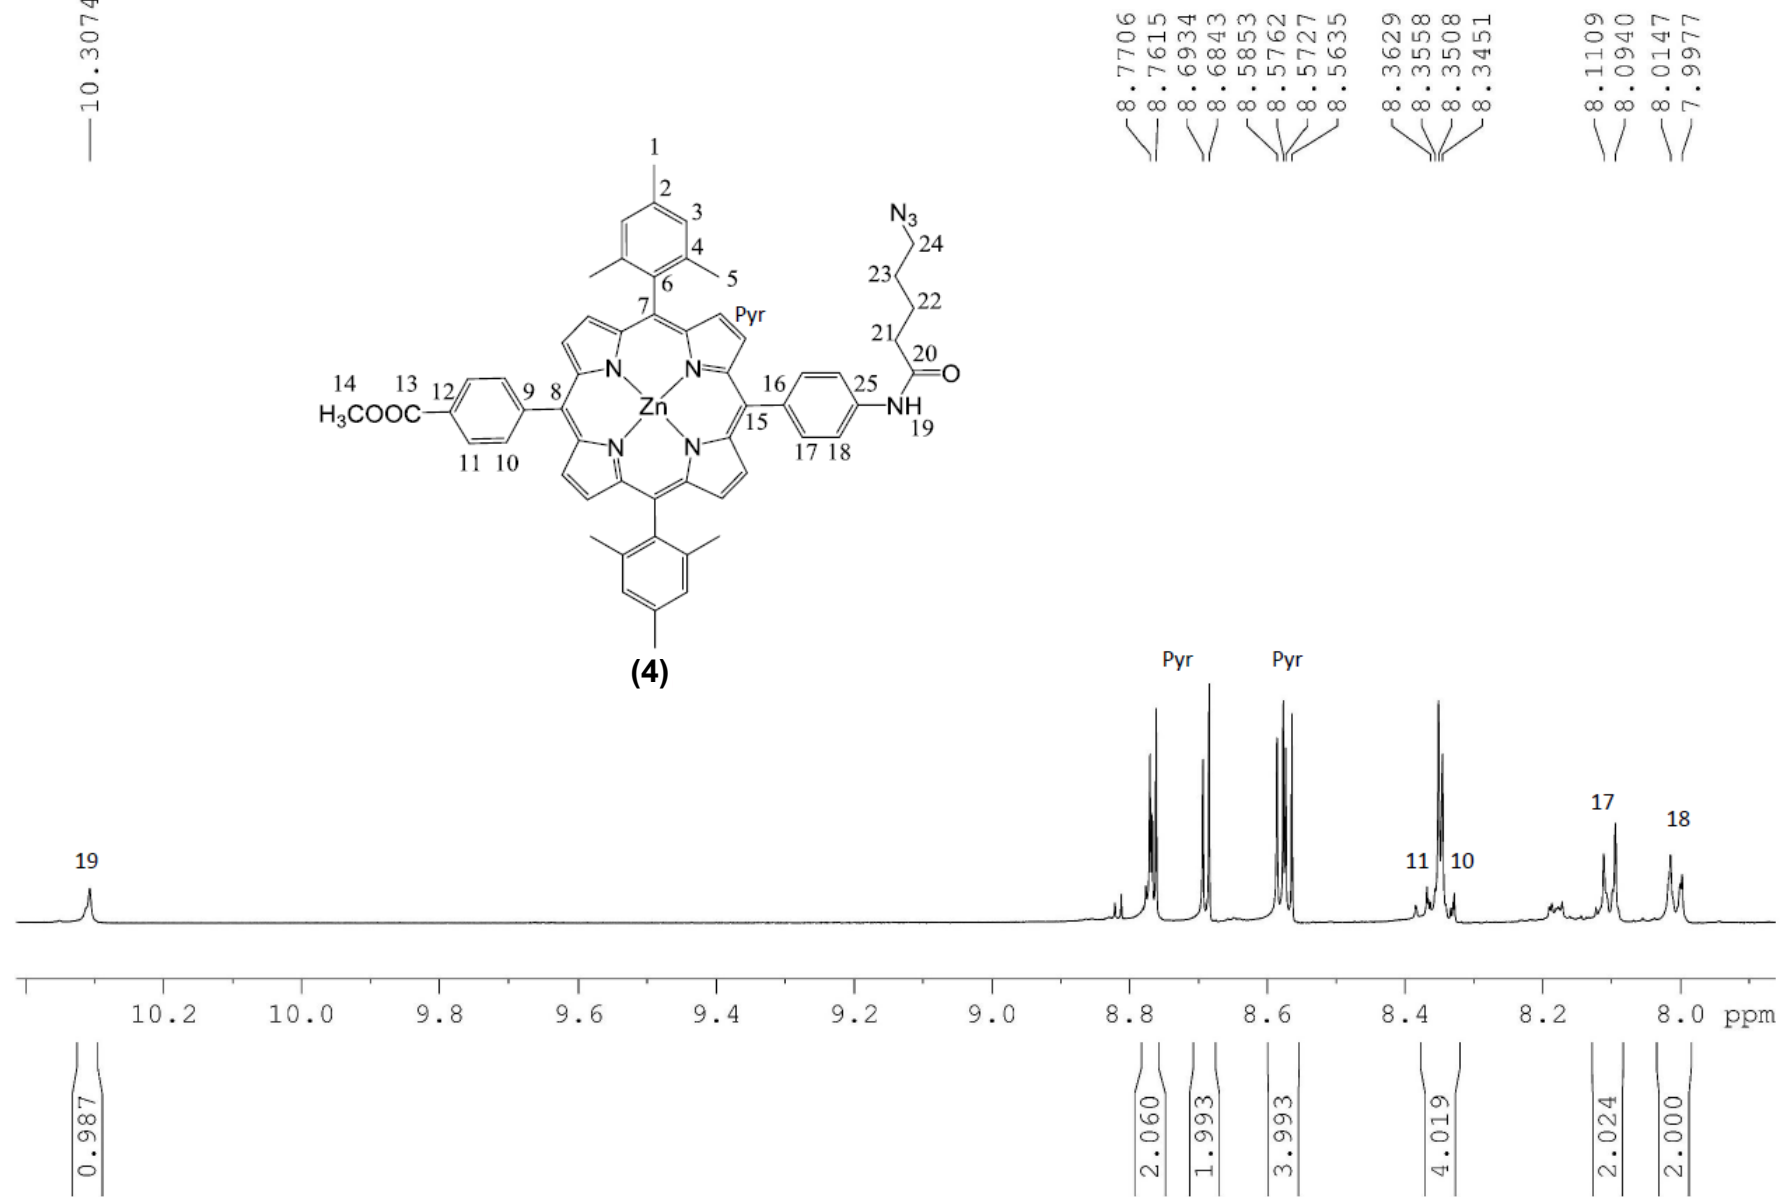

Figure S6: Focus on aromatic region of <sup>1</sup>H NMR spectrum of **4** (500MHz, DMSO-d<sub>6</sub>).

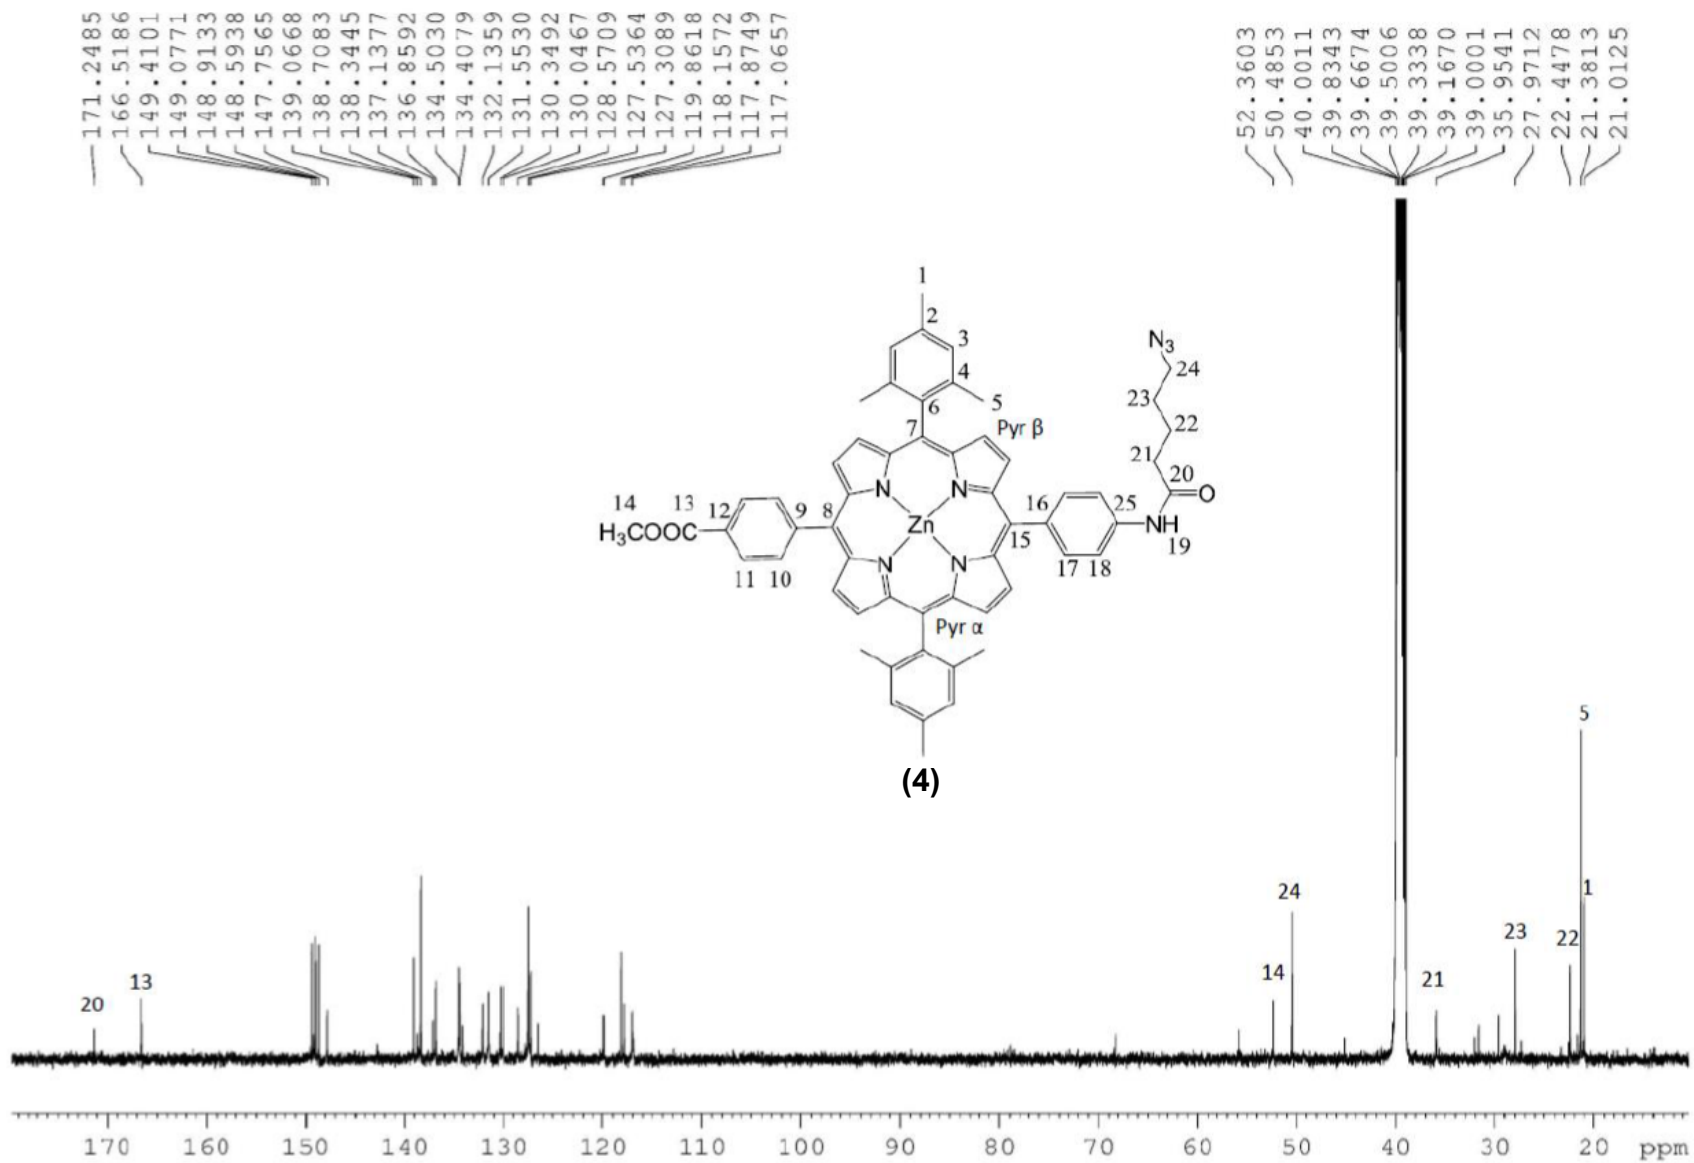

Figure S7: <sup>13</sup>C NMR spectrum of **4** (125MHz, DMSO-d<sub>6</sub>).

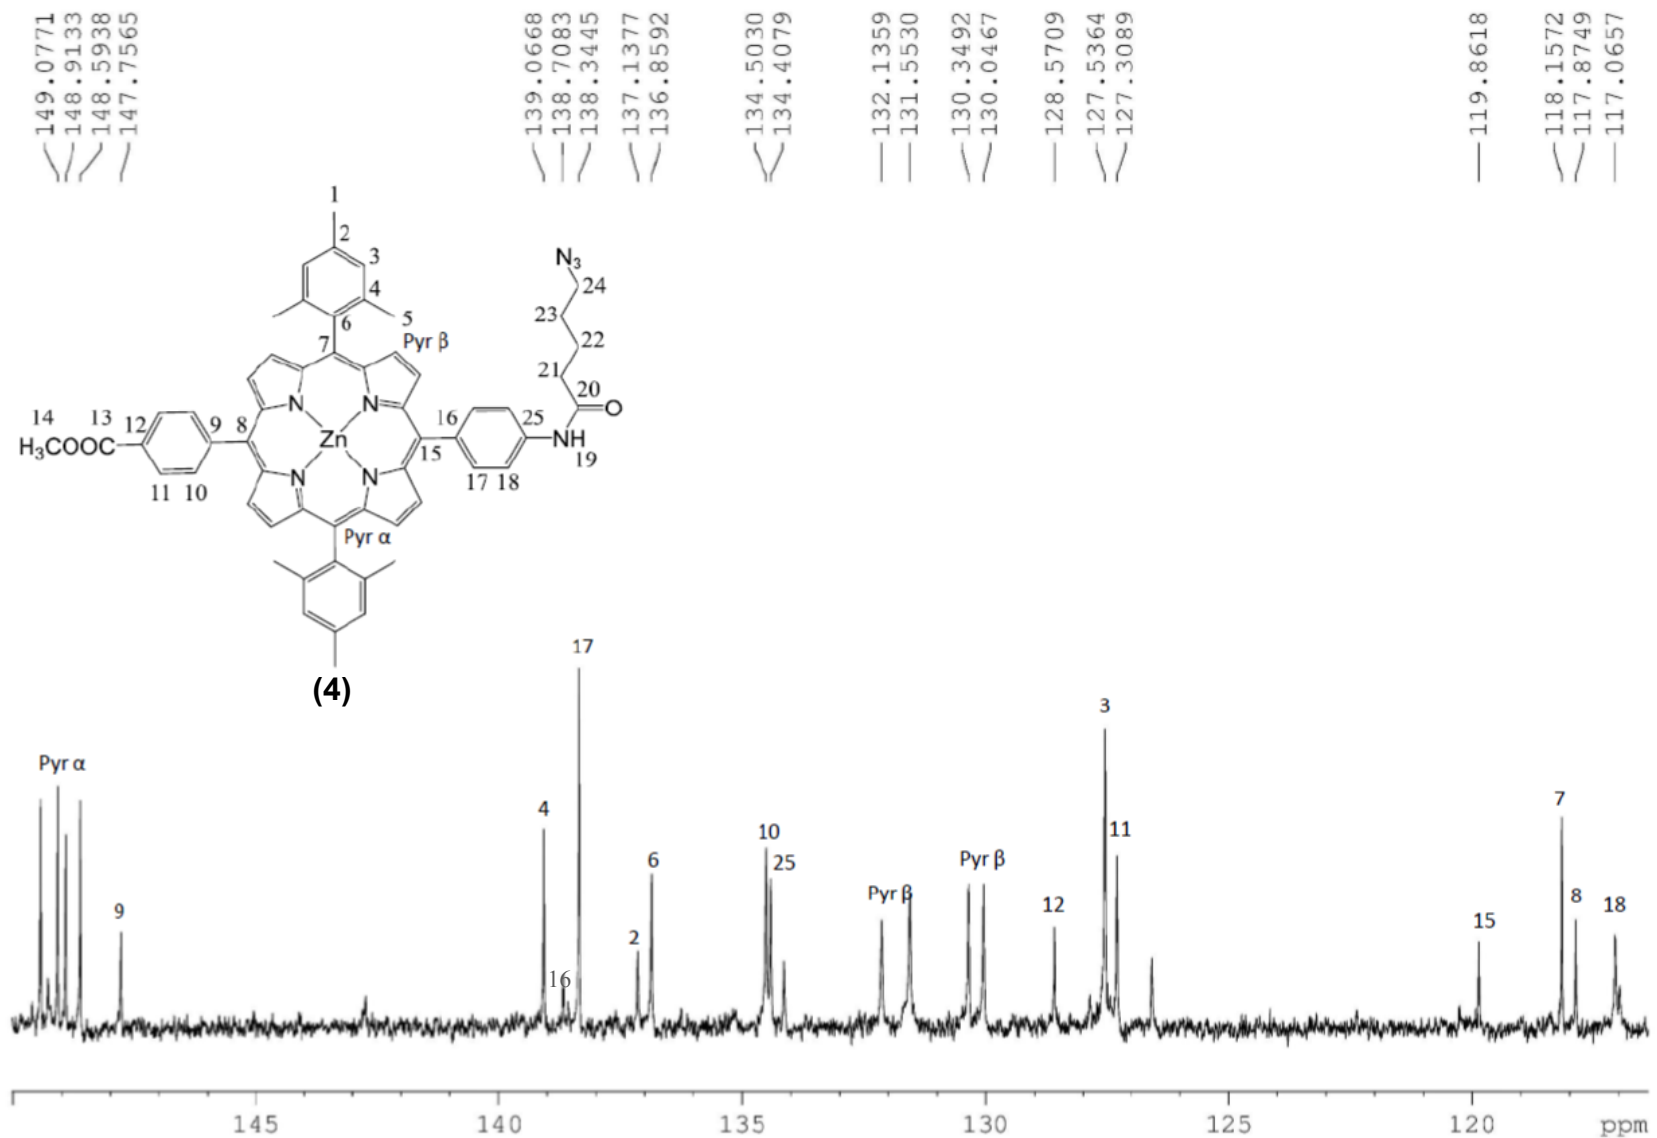

Figure S8: Focus on  $^{13}\text{C}$  NMR spectrum of **4** (125MHz, DMSO- $d_6$ ).

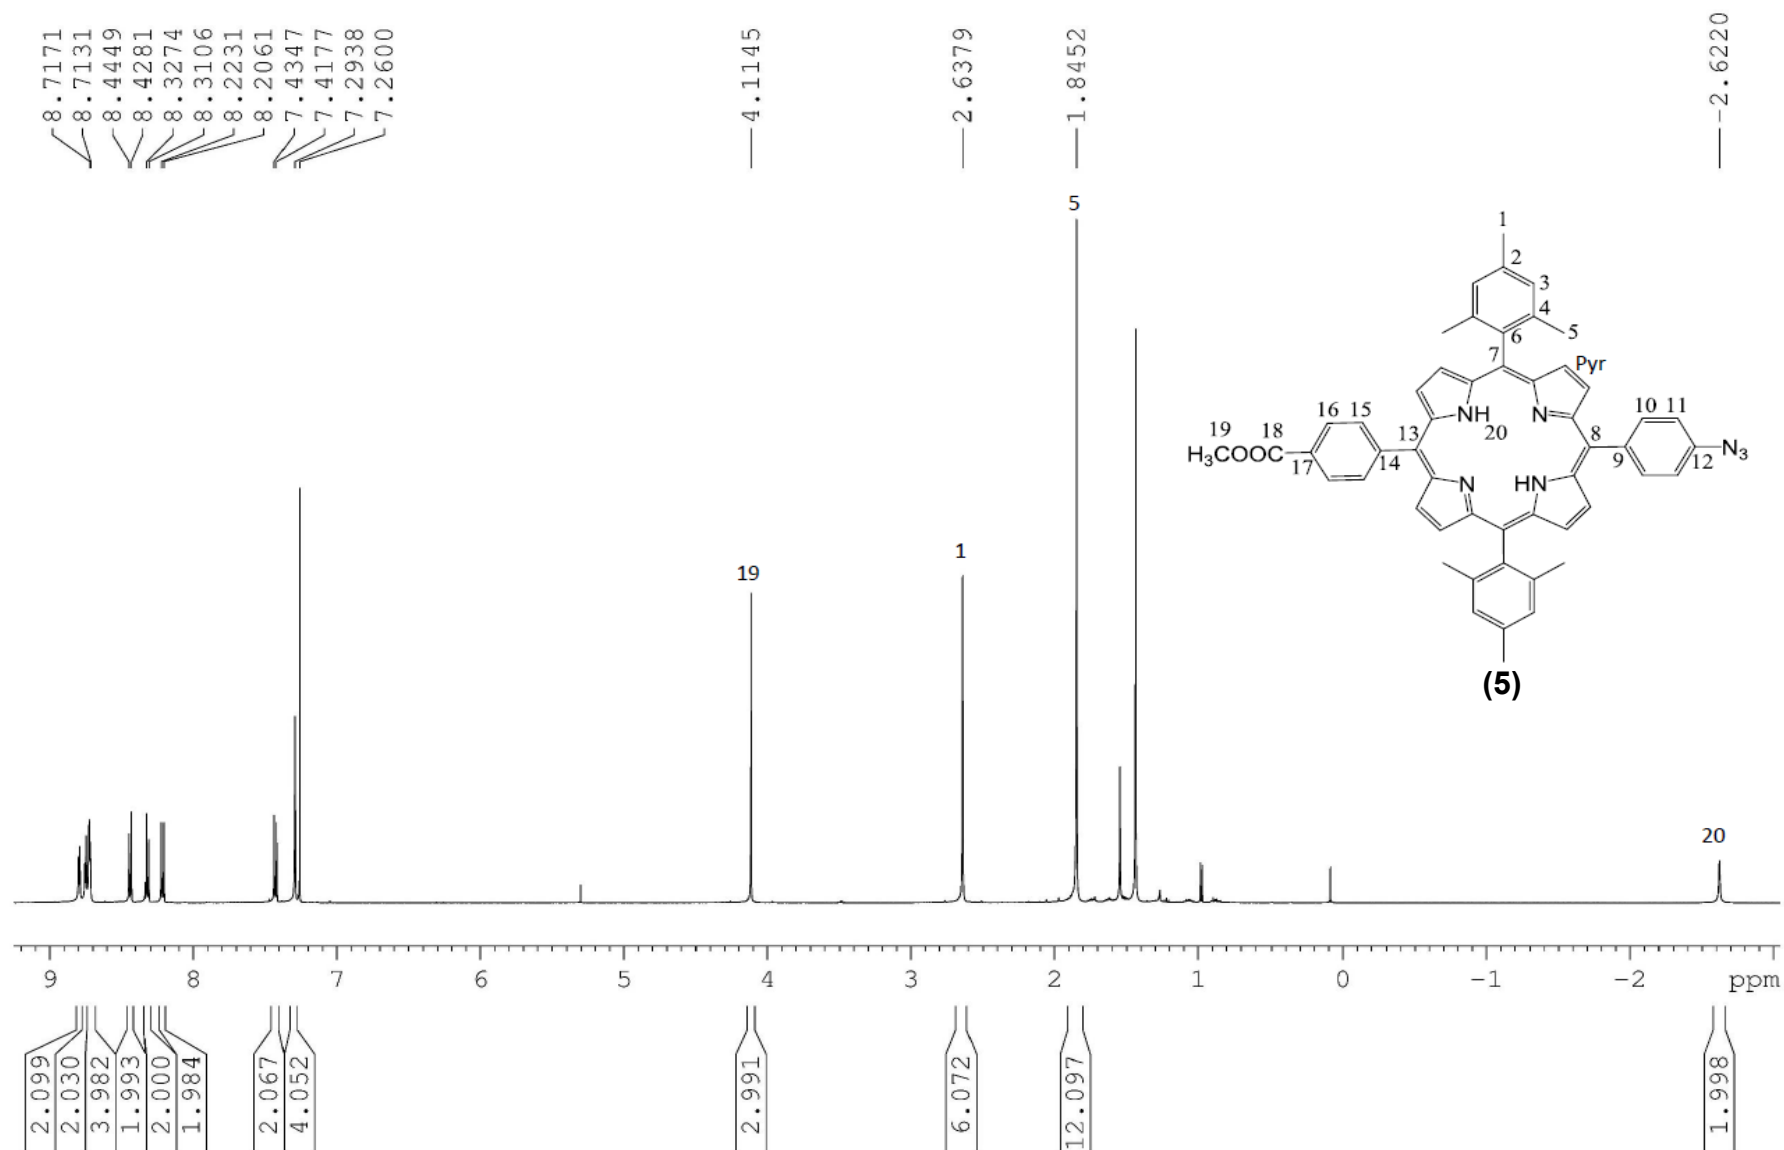

Figure S9: <sup>1</sup>H NMR spectrum of **5** (500MHz, CDCl<sub>3</sub>).

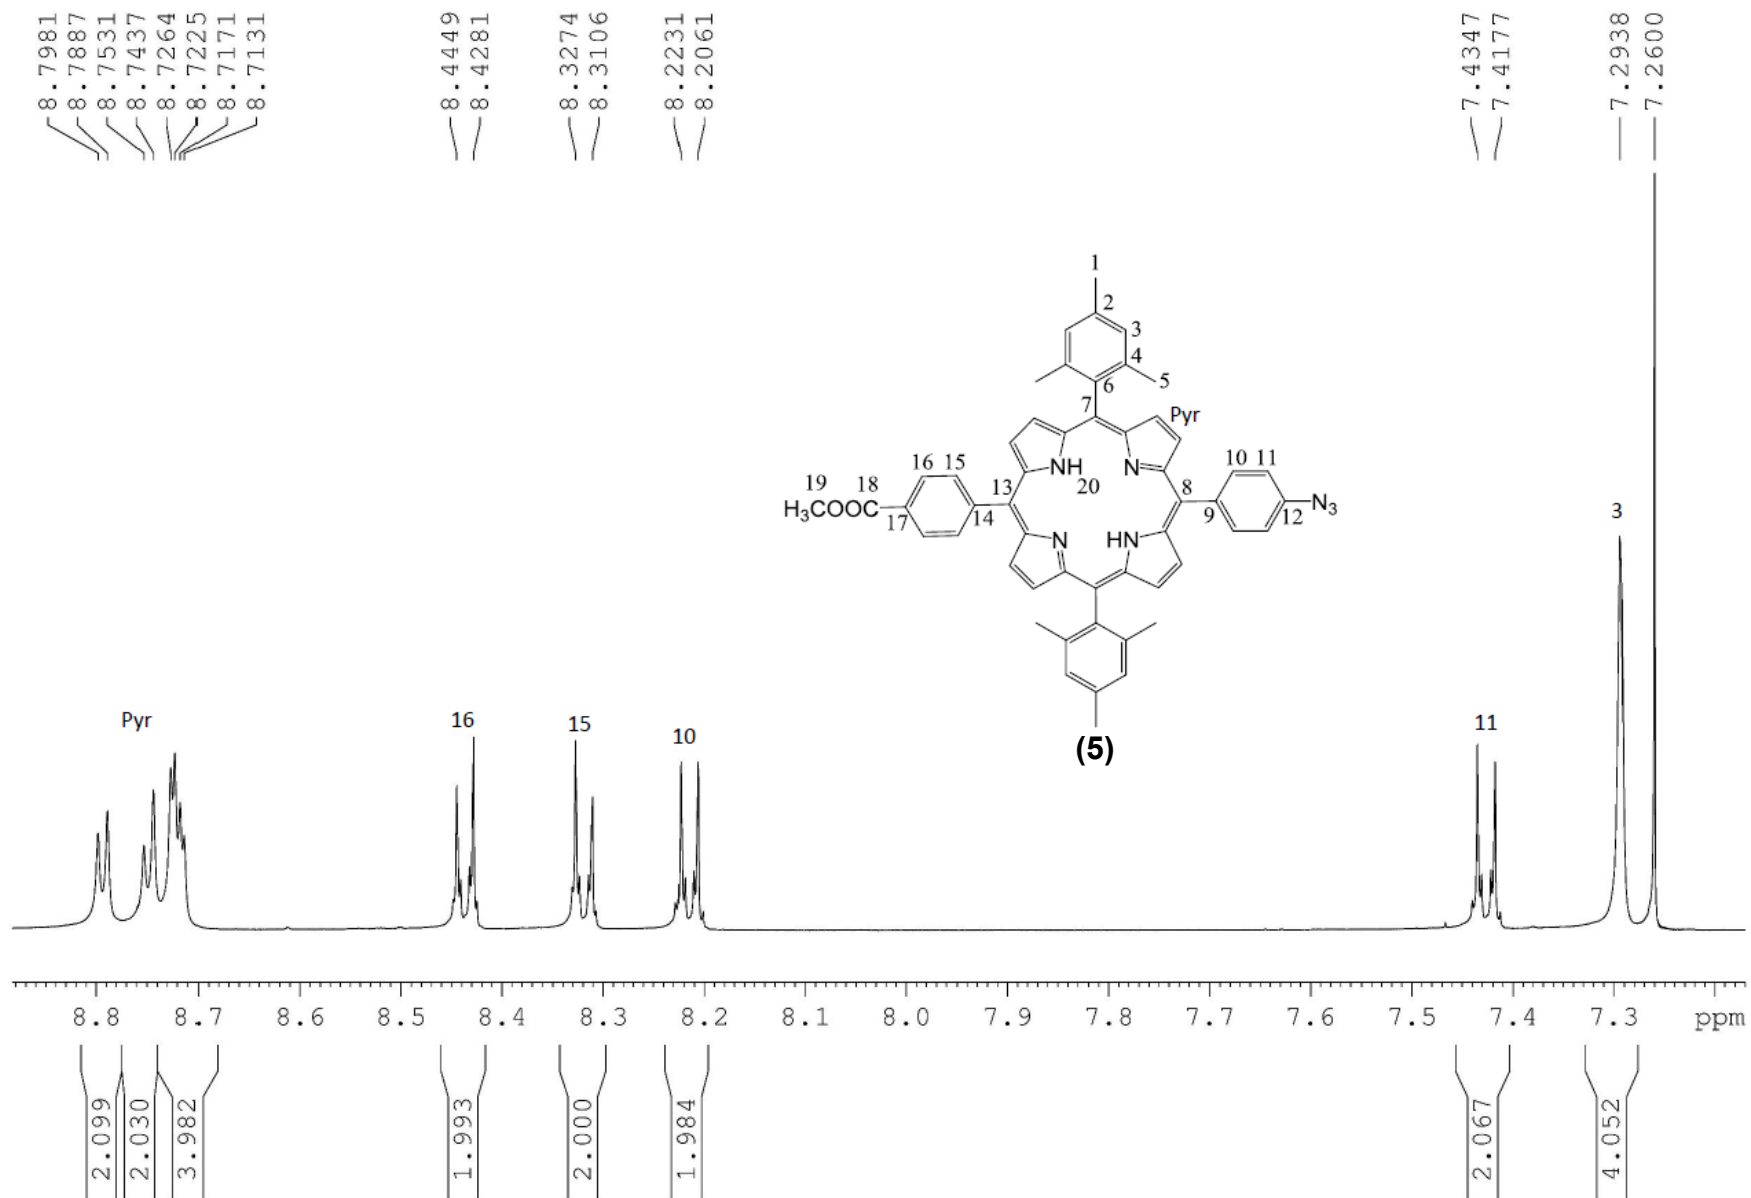

Figure S10: Focus on aromatic region of  $^1\text{H}$  NMR spectrum of **5** (500MHz,  $\text{CDCl}_3$ ).

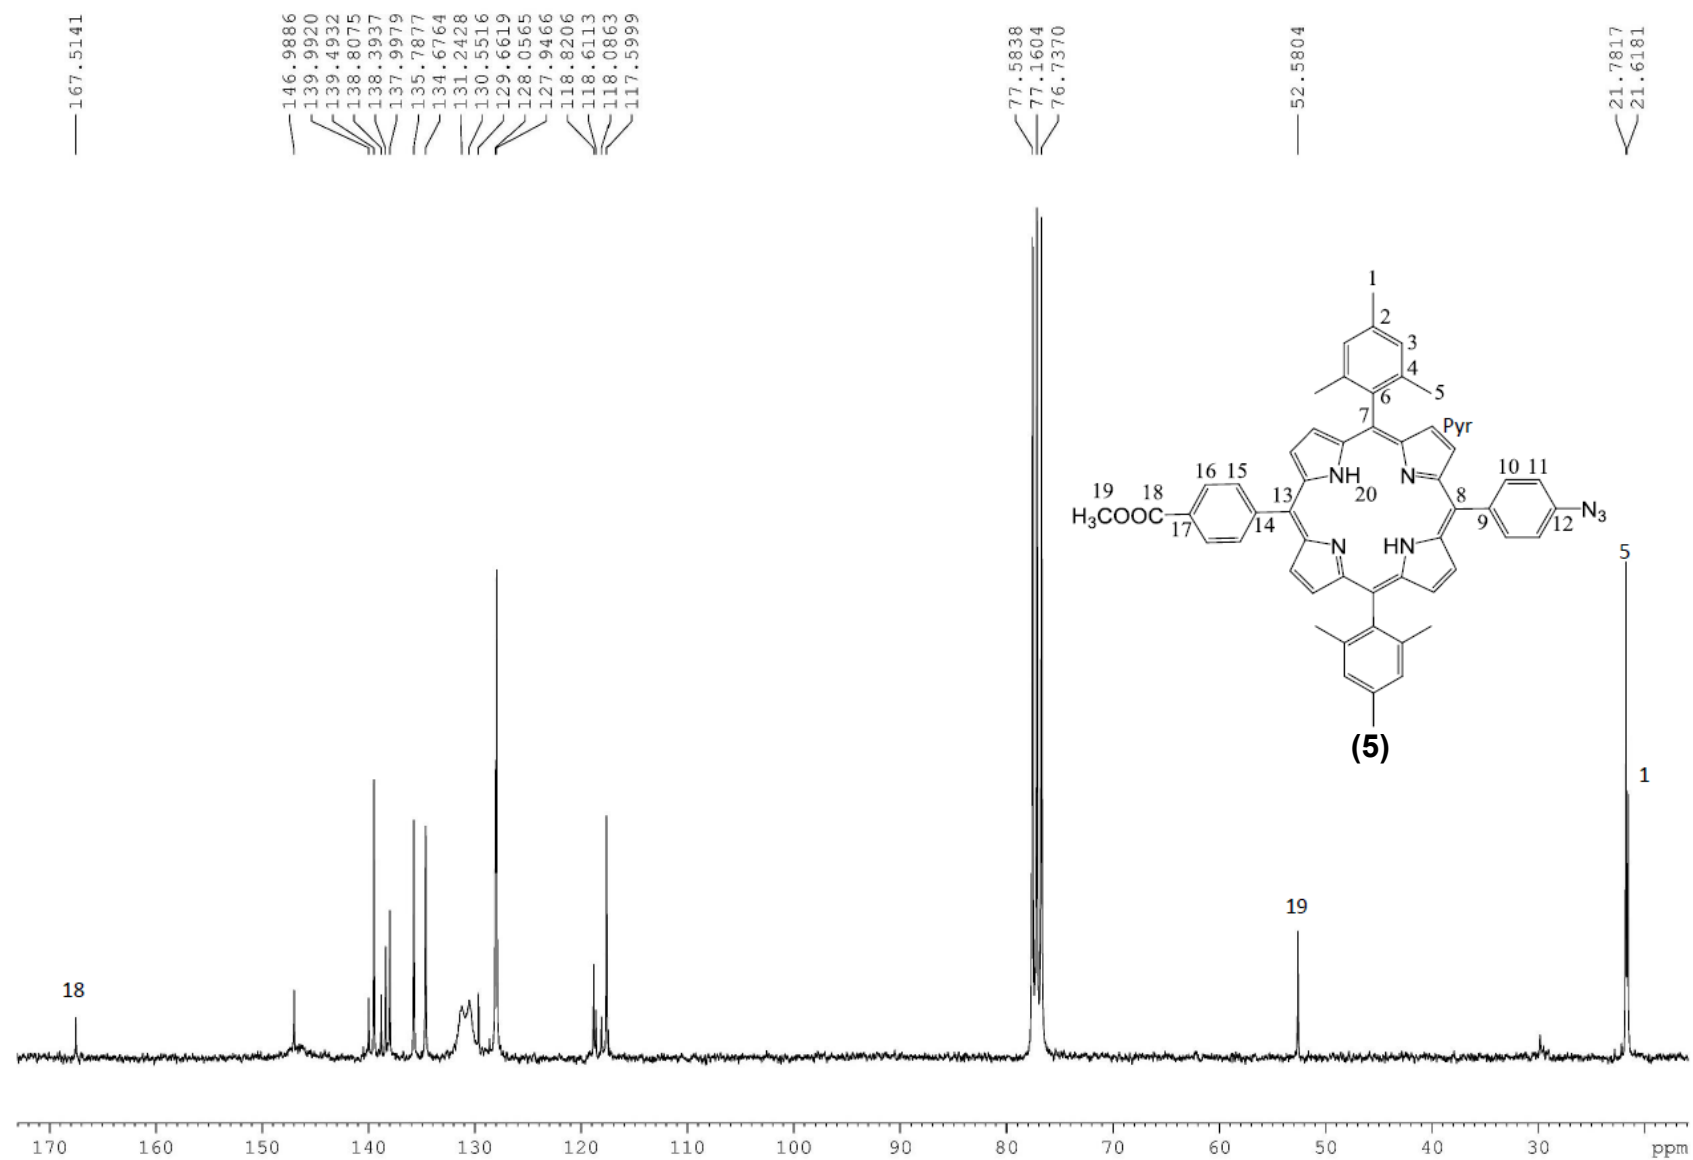

Figure S11:  $^{13}\text{C}$  NMR spectrum of **5** (125MHz,  $\text{CDCl}_3$ ).

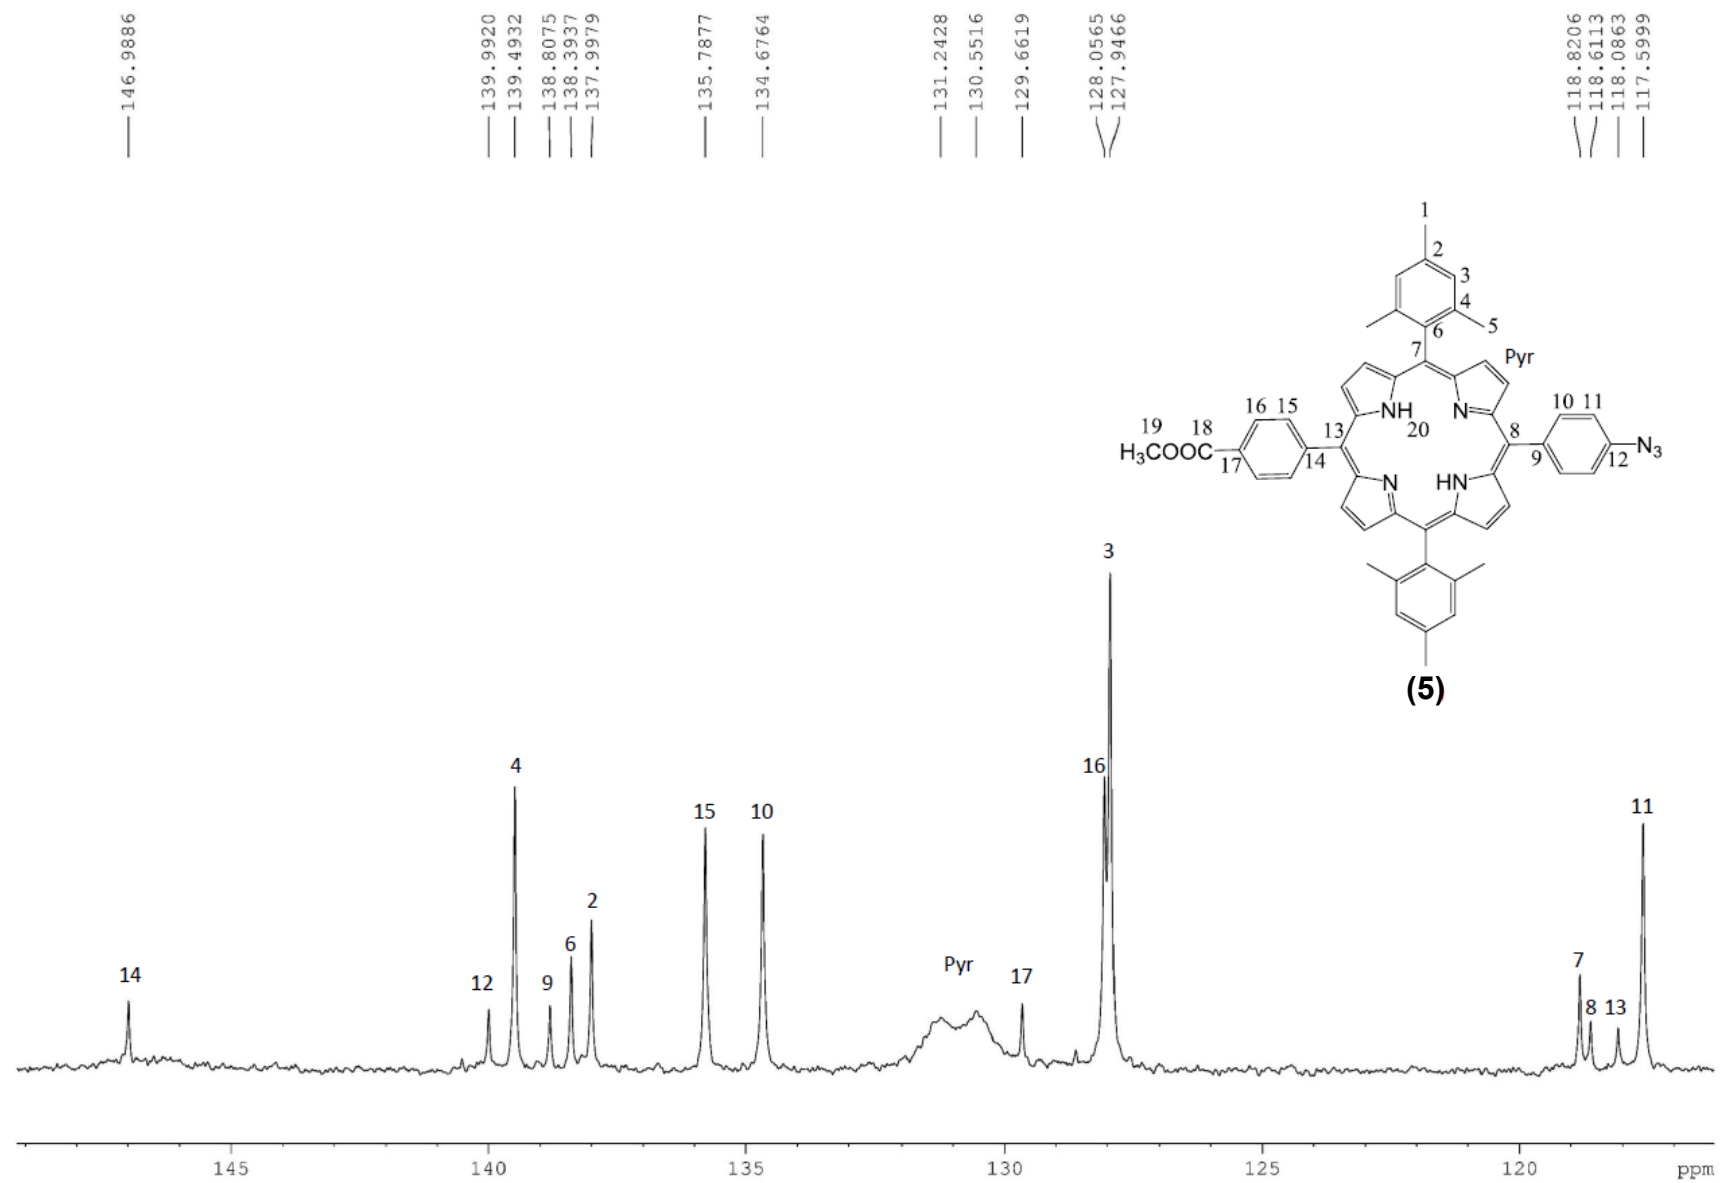

Figure S12: Focus on <sup>13</sup>C NMR spectrum of **5** (125MHz, CDCl<sub>3</sub>).

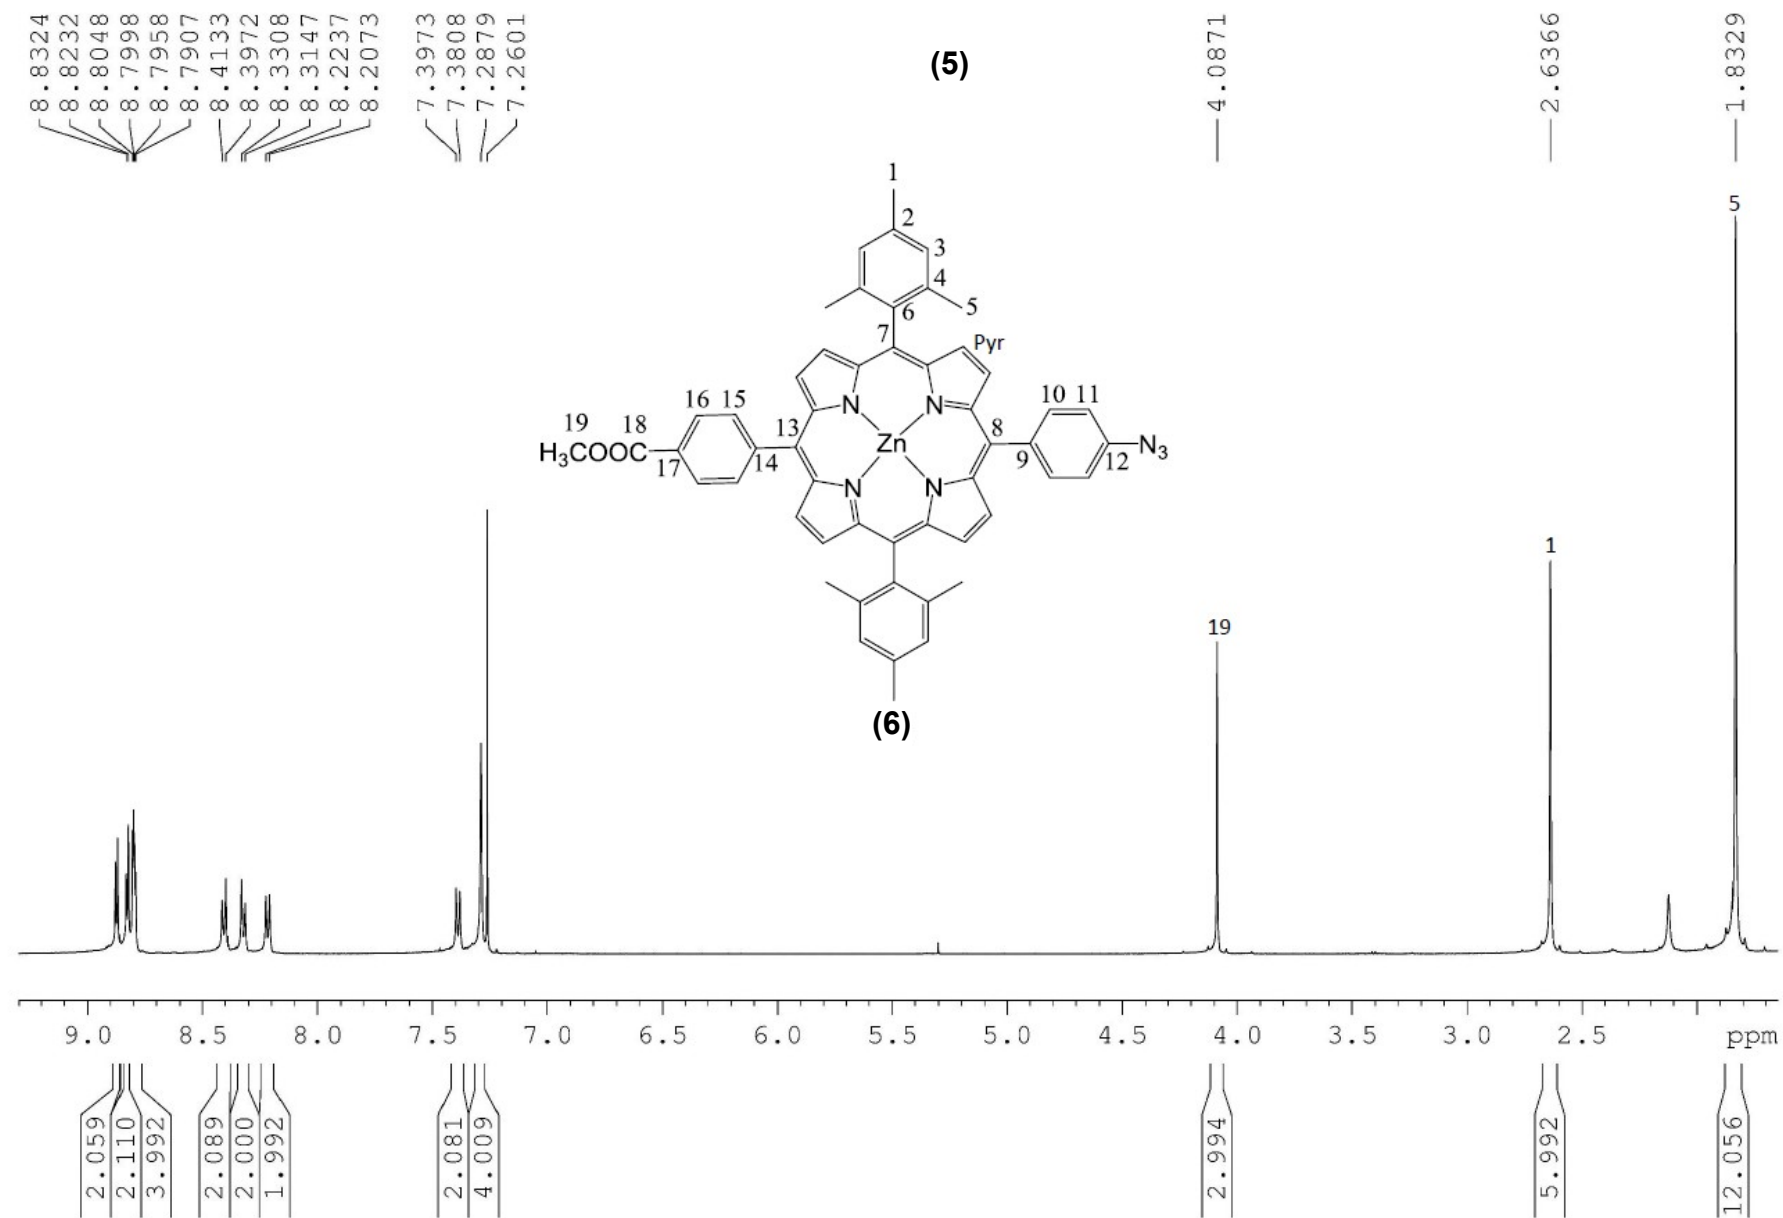

Figure S13:  $^1\text{H}$  NMR spectrum of **6** (500MHz,  $\text{CDCl}_3$ ).



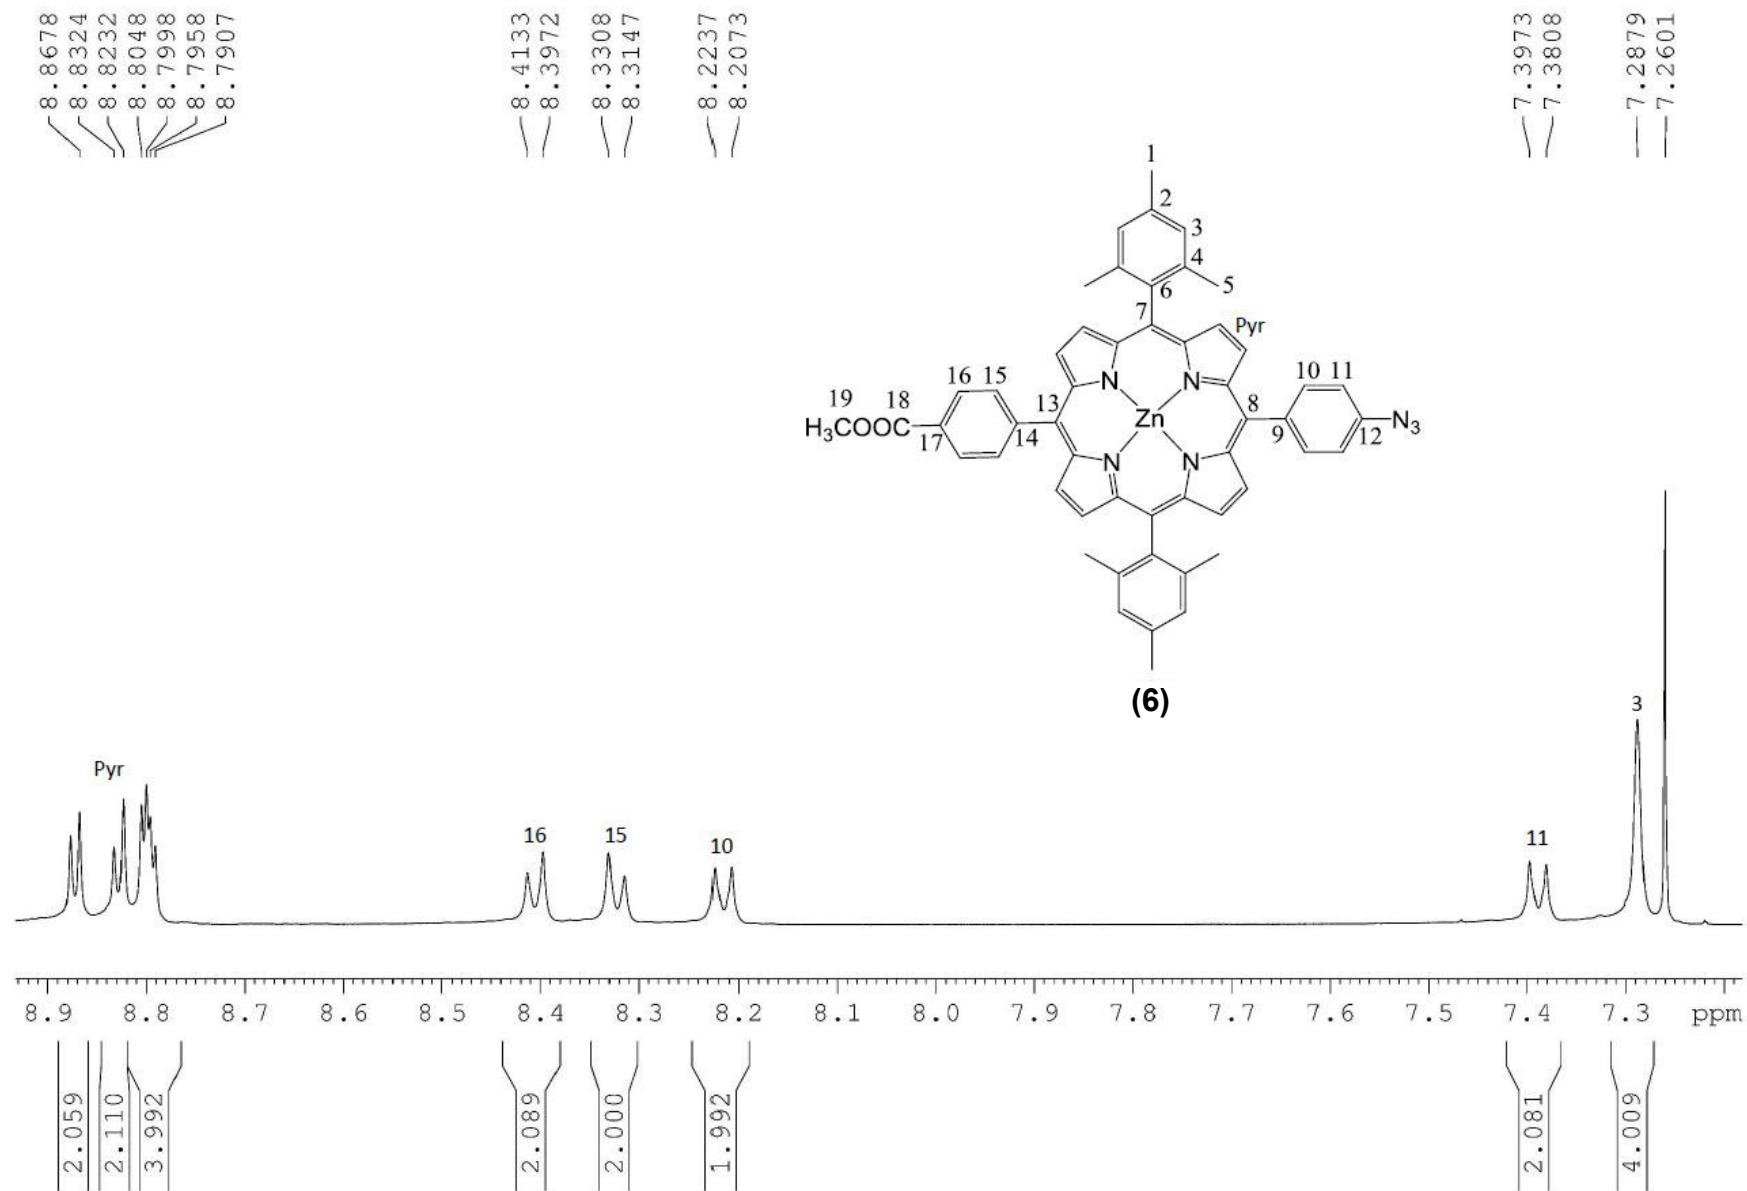

Figure S14: Focus on aromatic region of  $^1\text{H}$  NMR spectrum of **6** (500MHz,  $\text{CDCl}_3$ ).

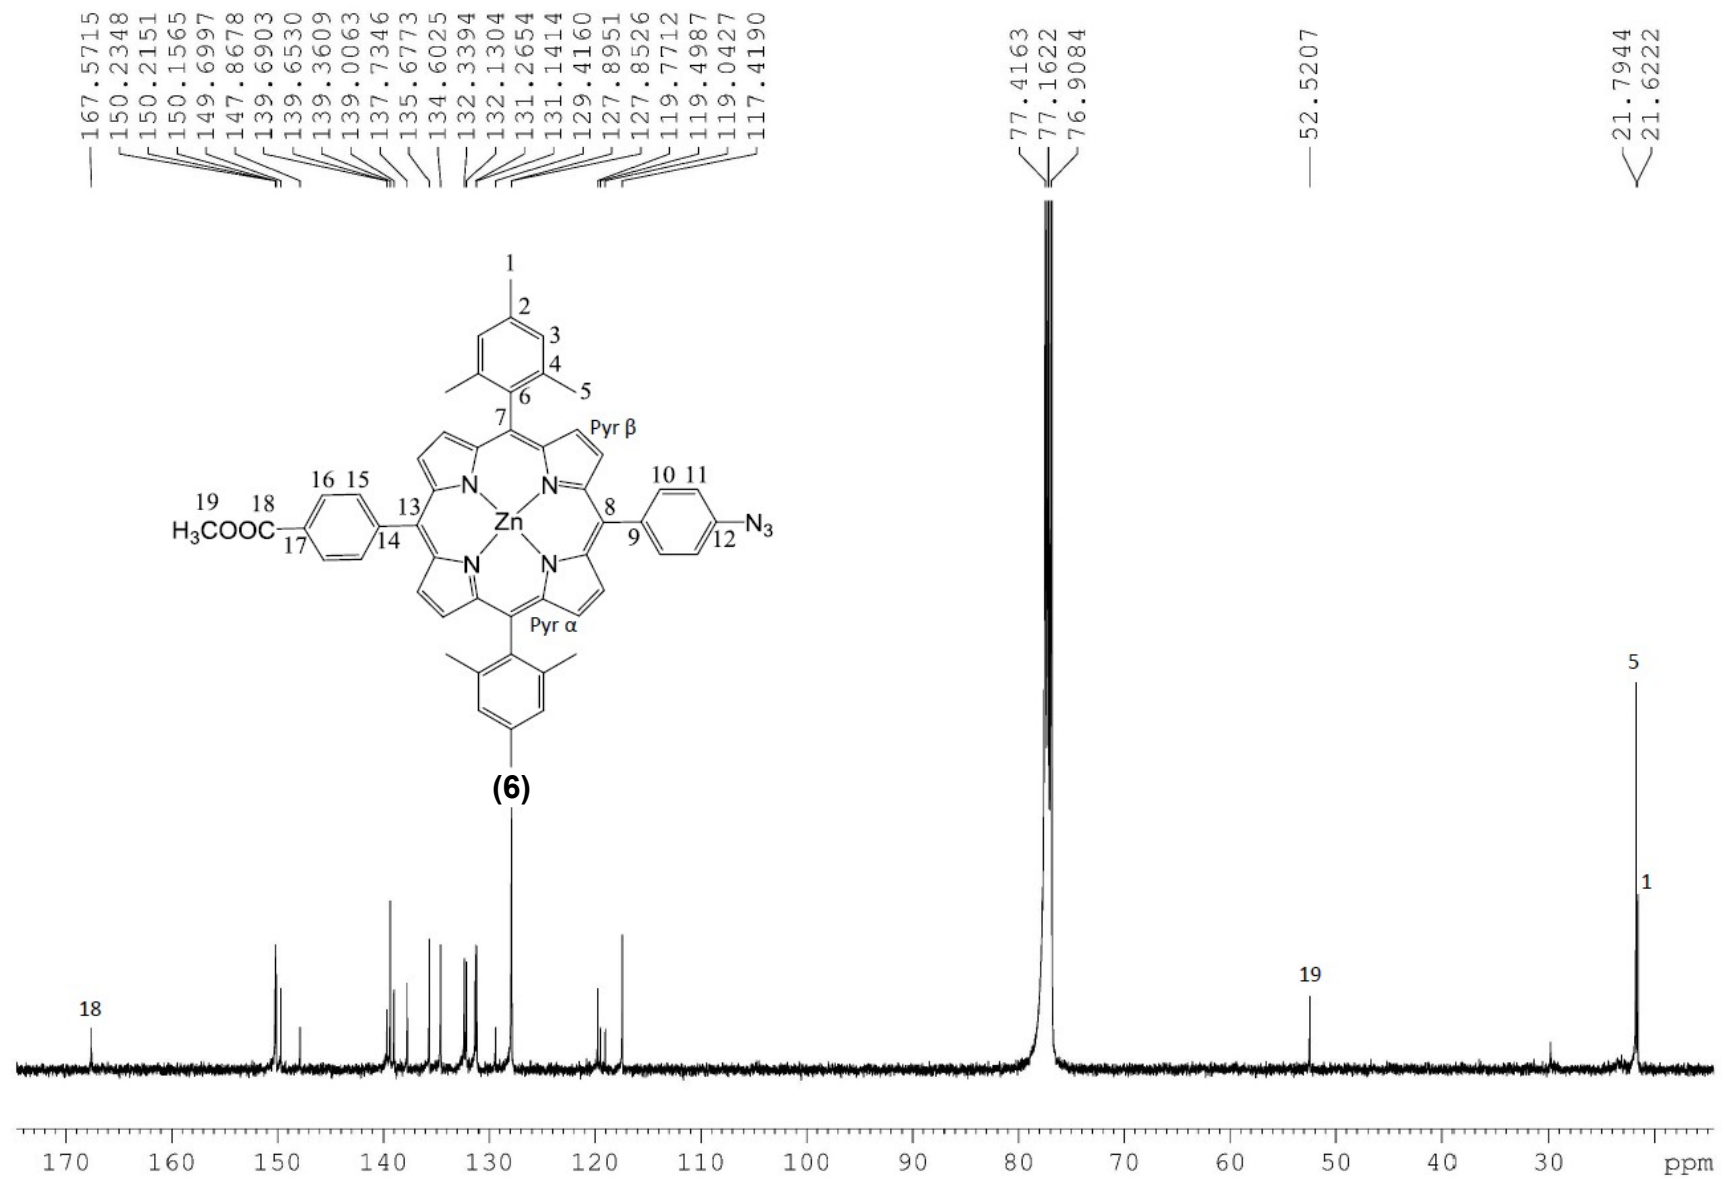

Figure S15: <sup>13</sup>C NMR spectrum of **6** (125MHz, CDCl<sub>3</sub>).

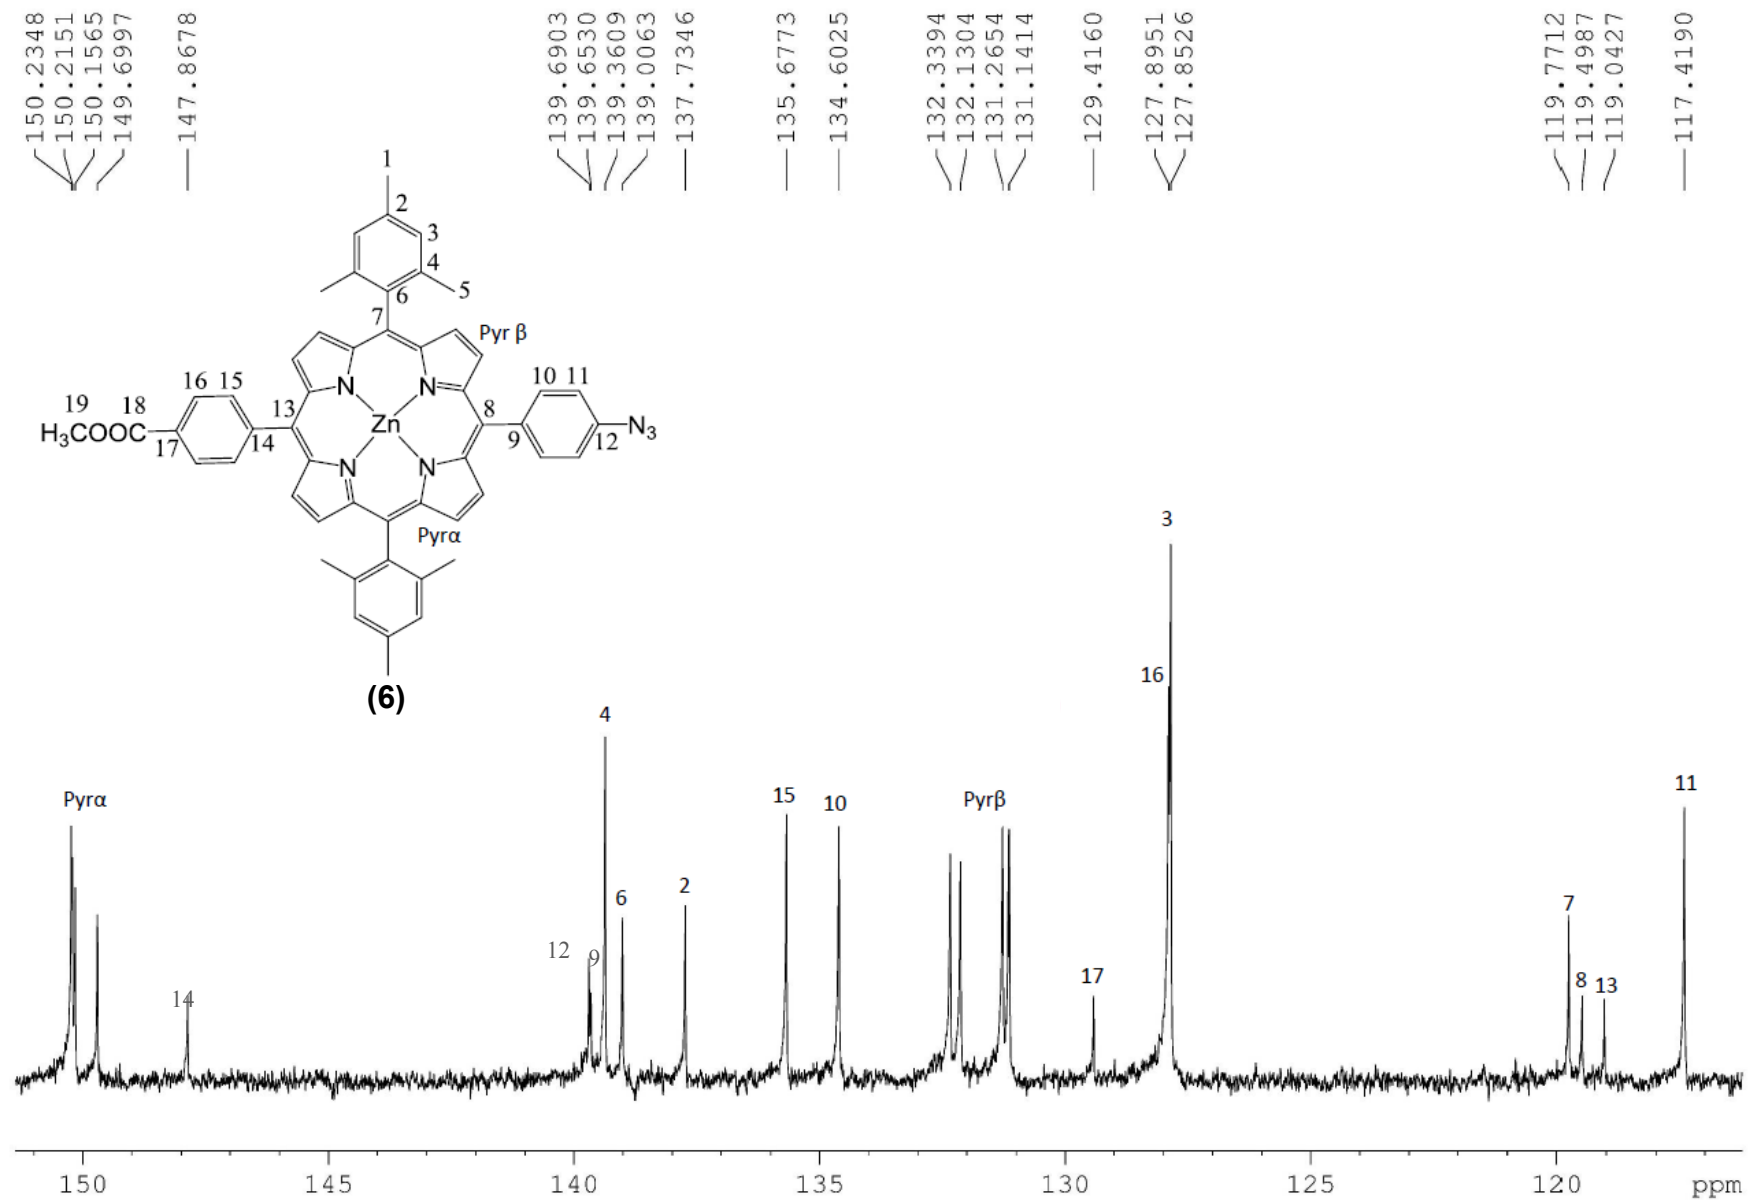

Figure S16: Focus on <sup>13</sup>C NMR spectrum of **6** (125MHz, CDCl<sub>3</sub>).

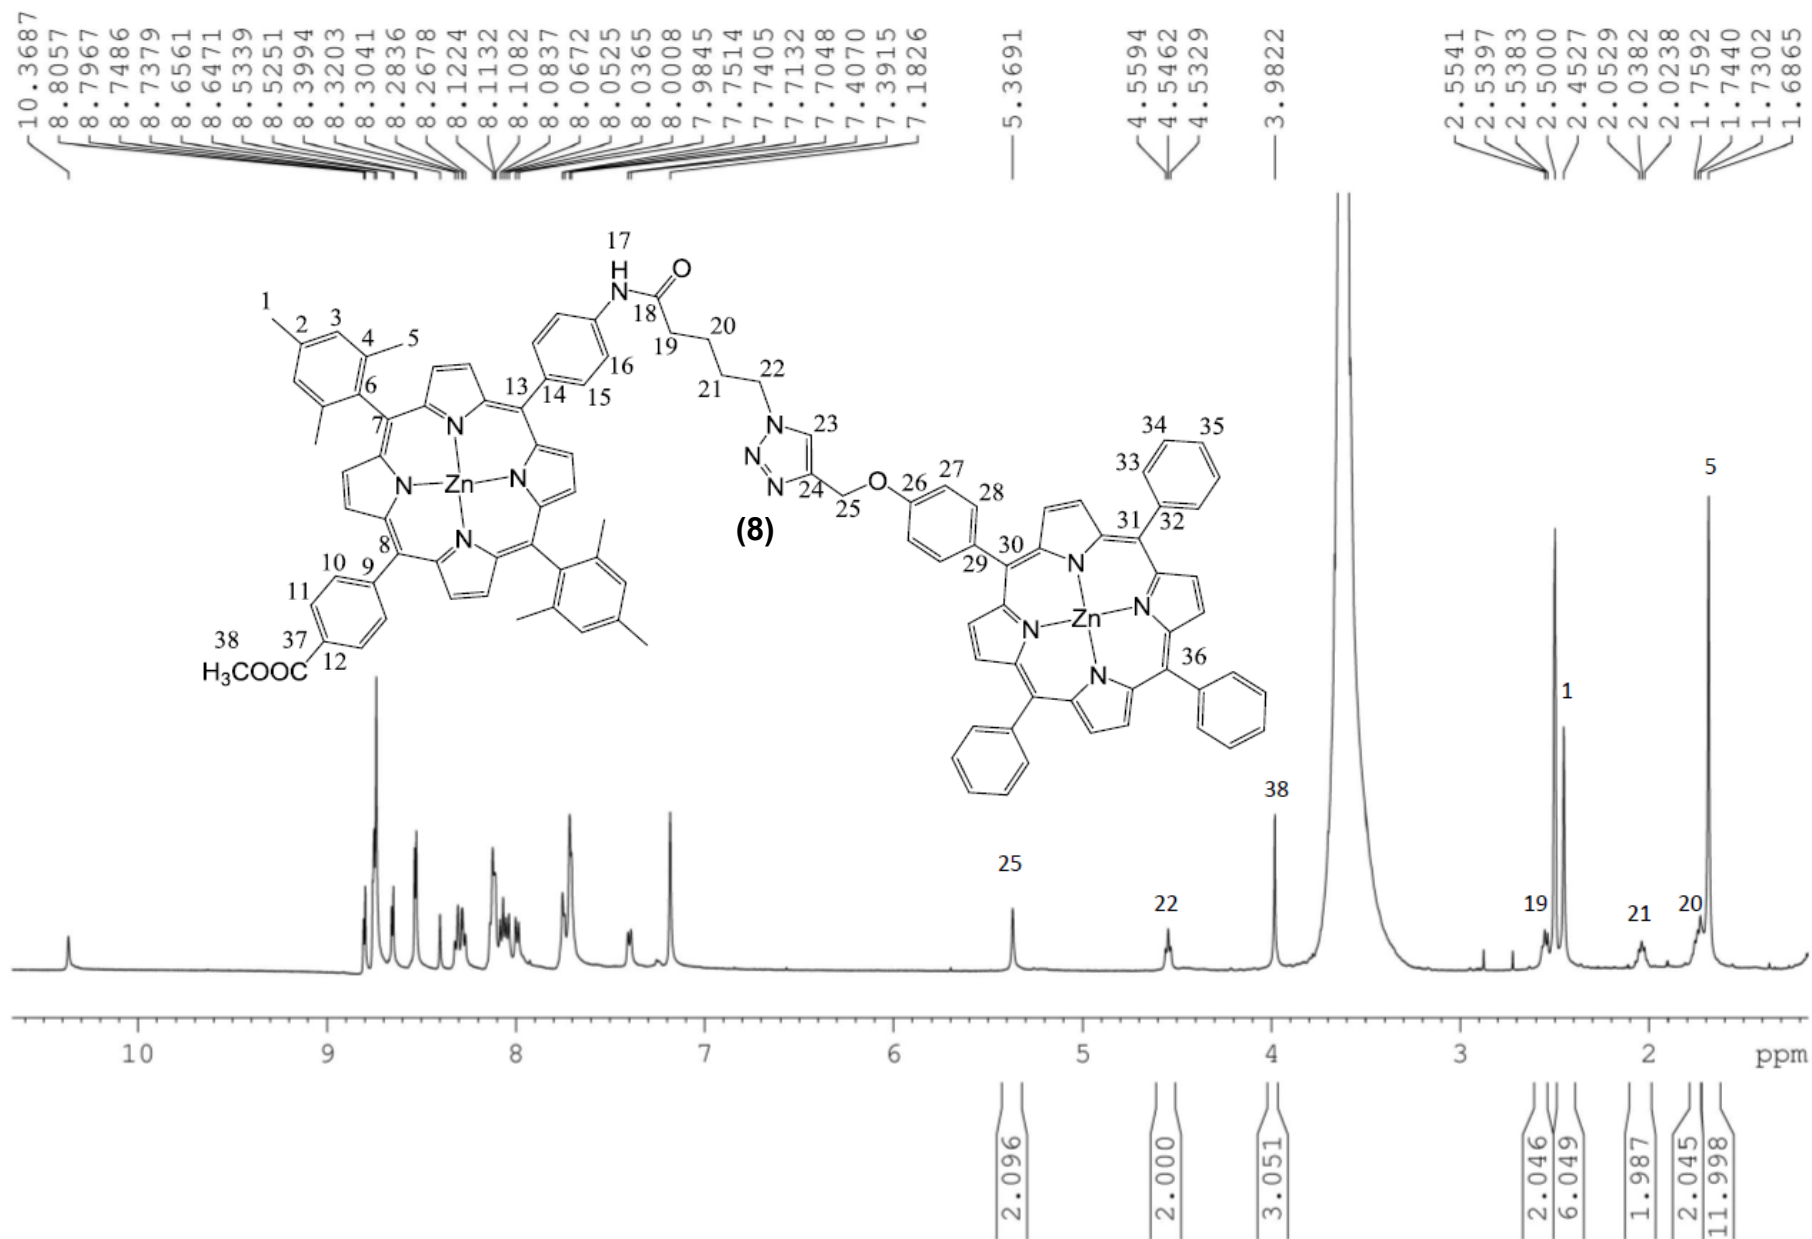

Figure S17: <sup>1</sup>H NMR spectrum of **8** (500MHz, DMSO-d<sub>6</sub>).

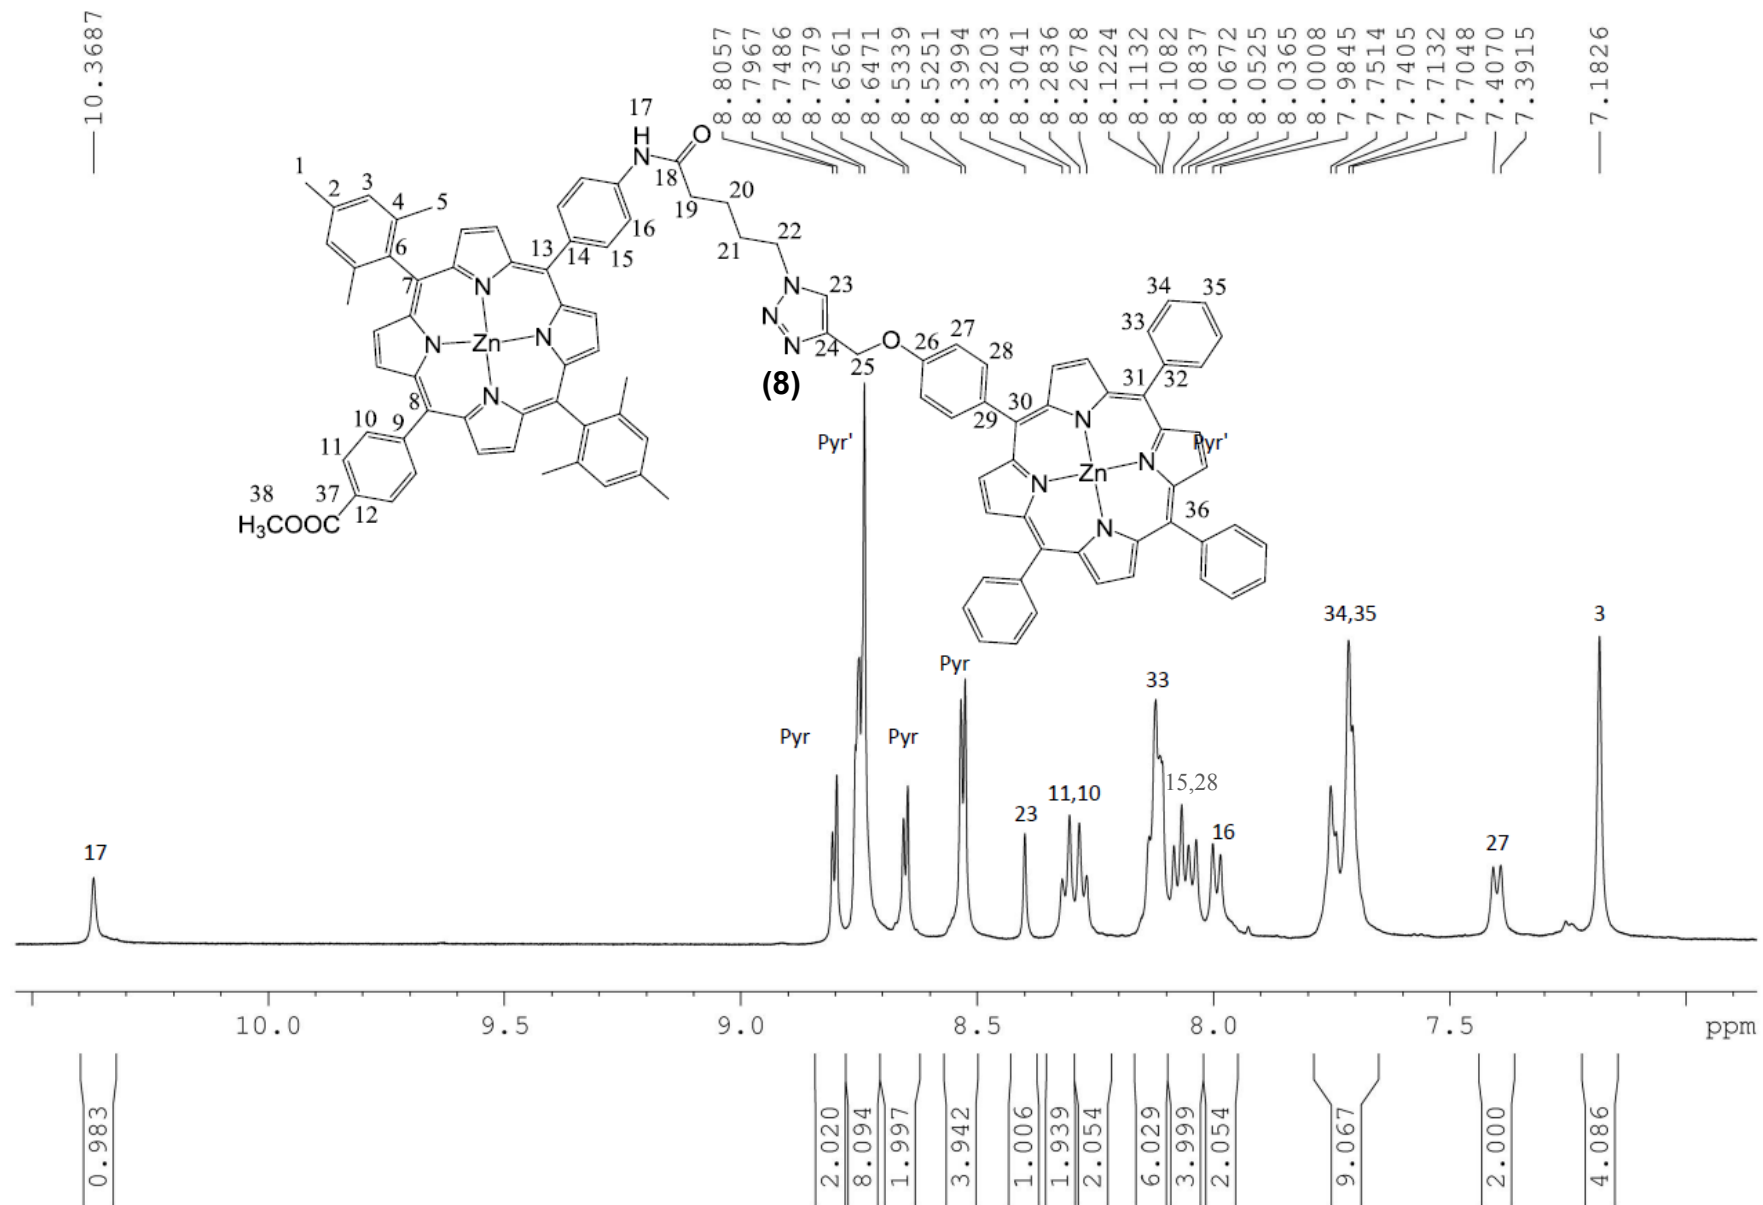

Figure S18: Focus on aromatic region of  $^1\text{H}$  NMR spectrum of **8** (500MHz,  $\text{DMSO-d}_6$ ).

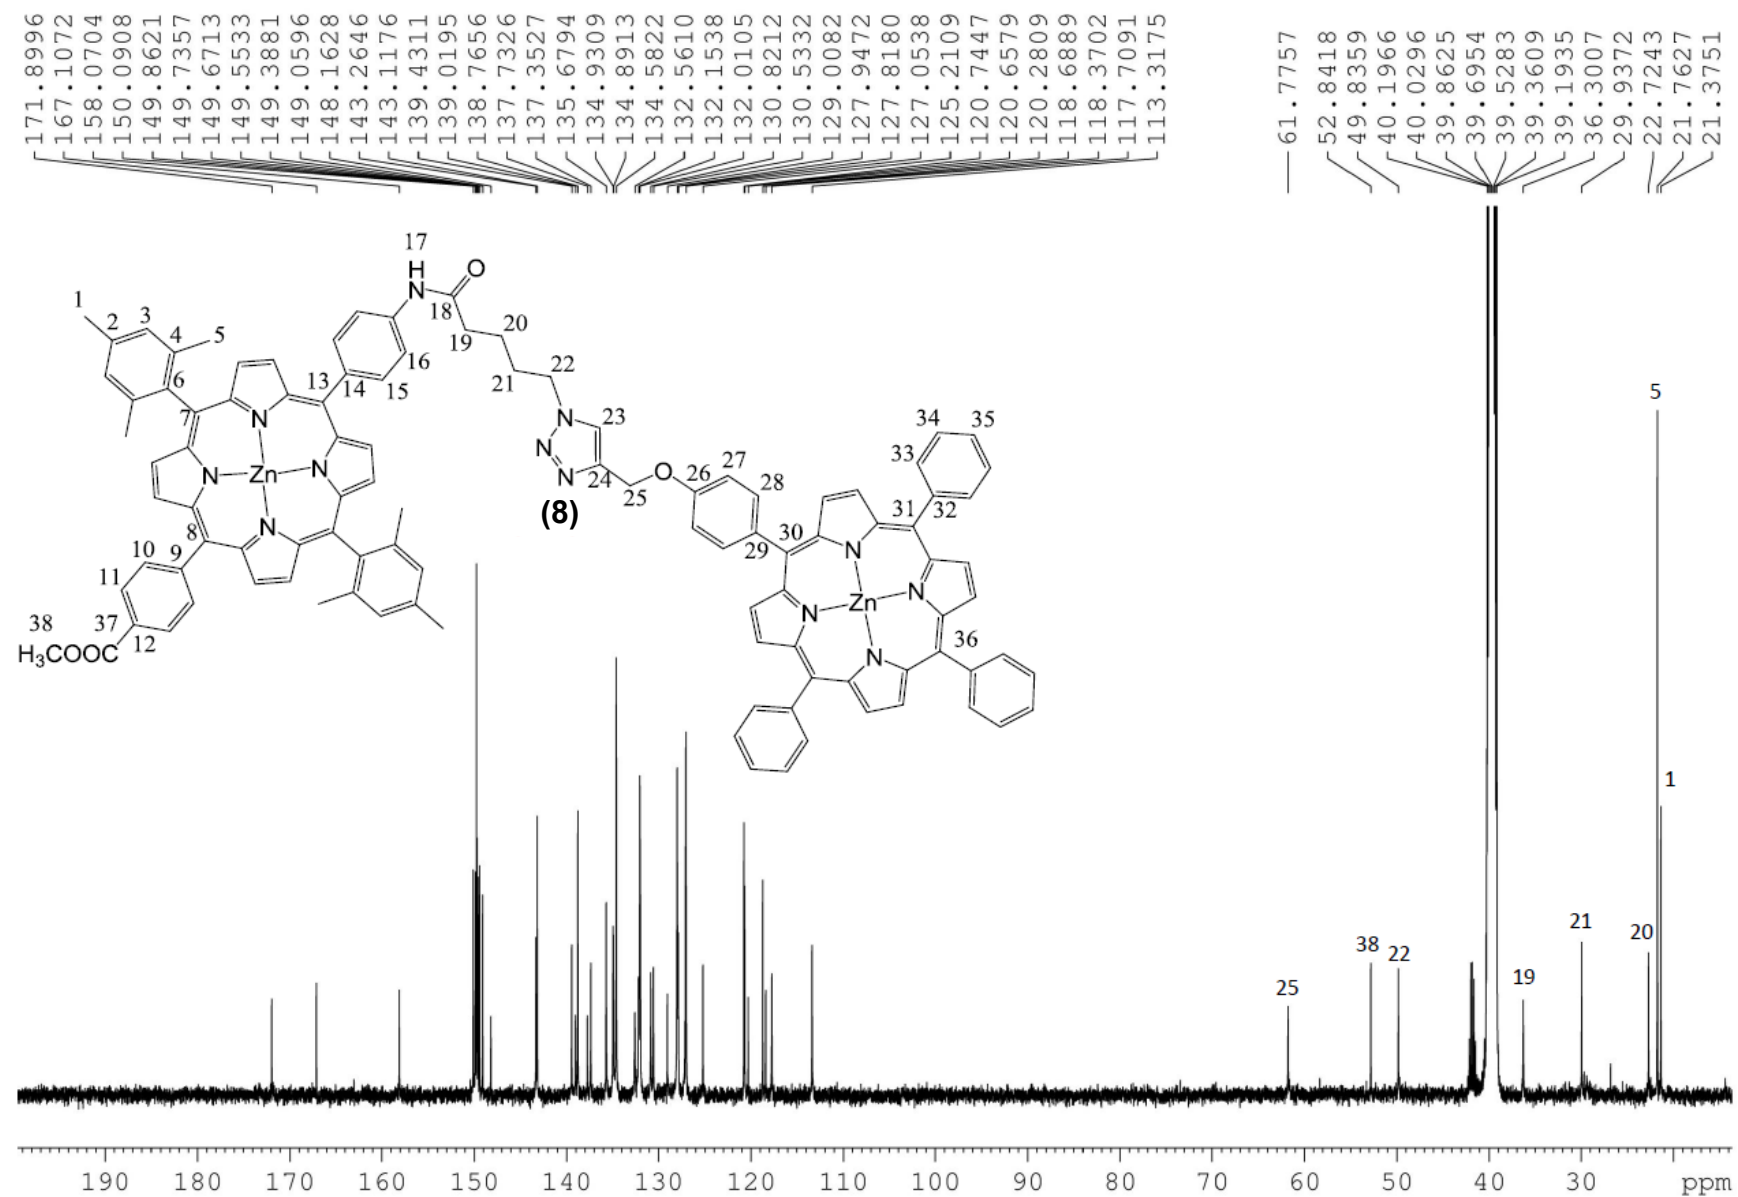

Figure S19: <sup>13</sup>C NMR spectrum of **8** (125MHz, DMSO-d<sub>6</sub>).

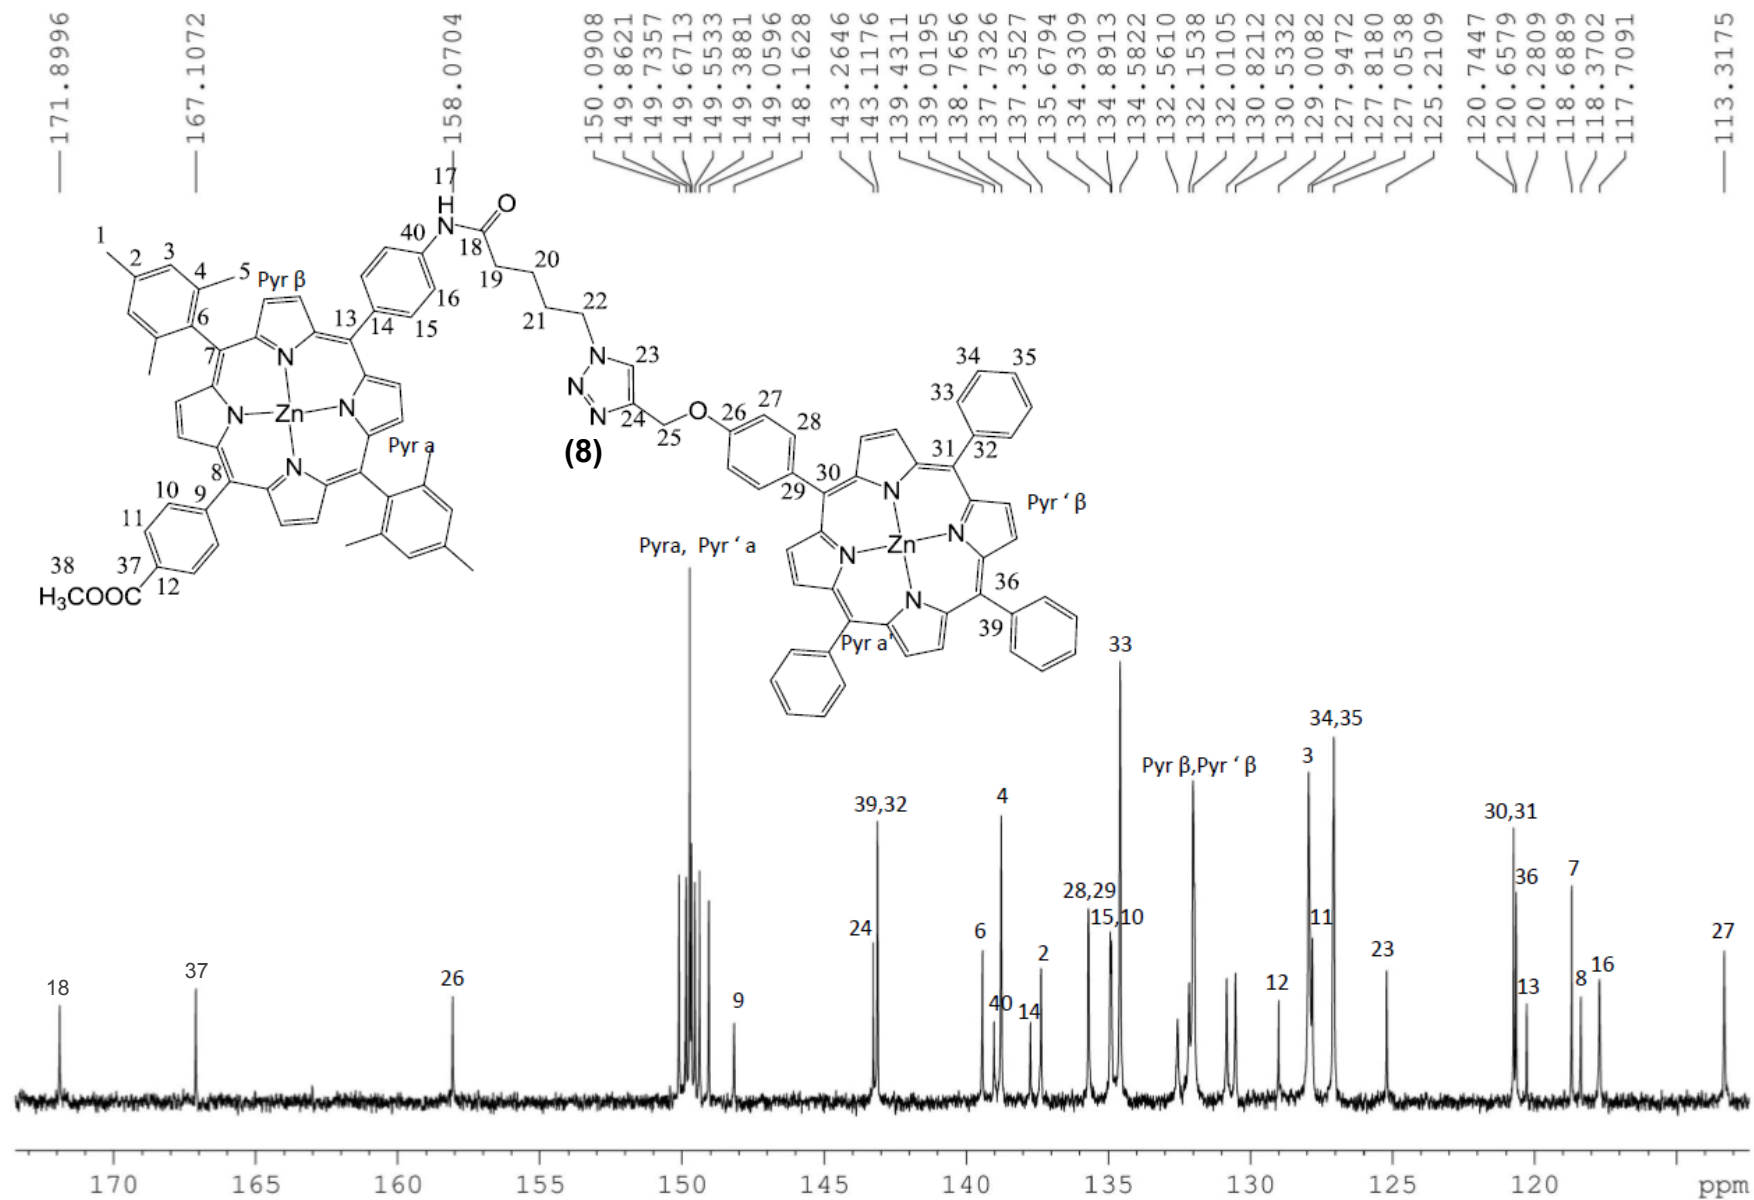

Figure S20: Focus on  $^{13}\text{C}$  NMR spectrum of **8** (125MHz, DMSO- $d_6$ ).

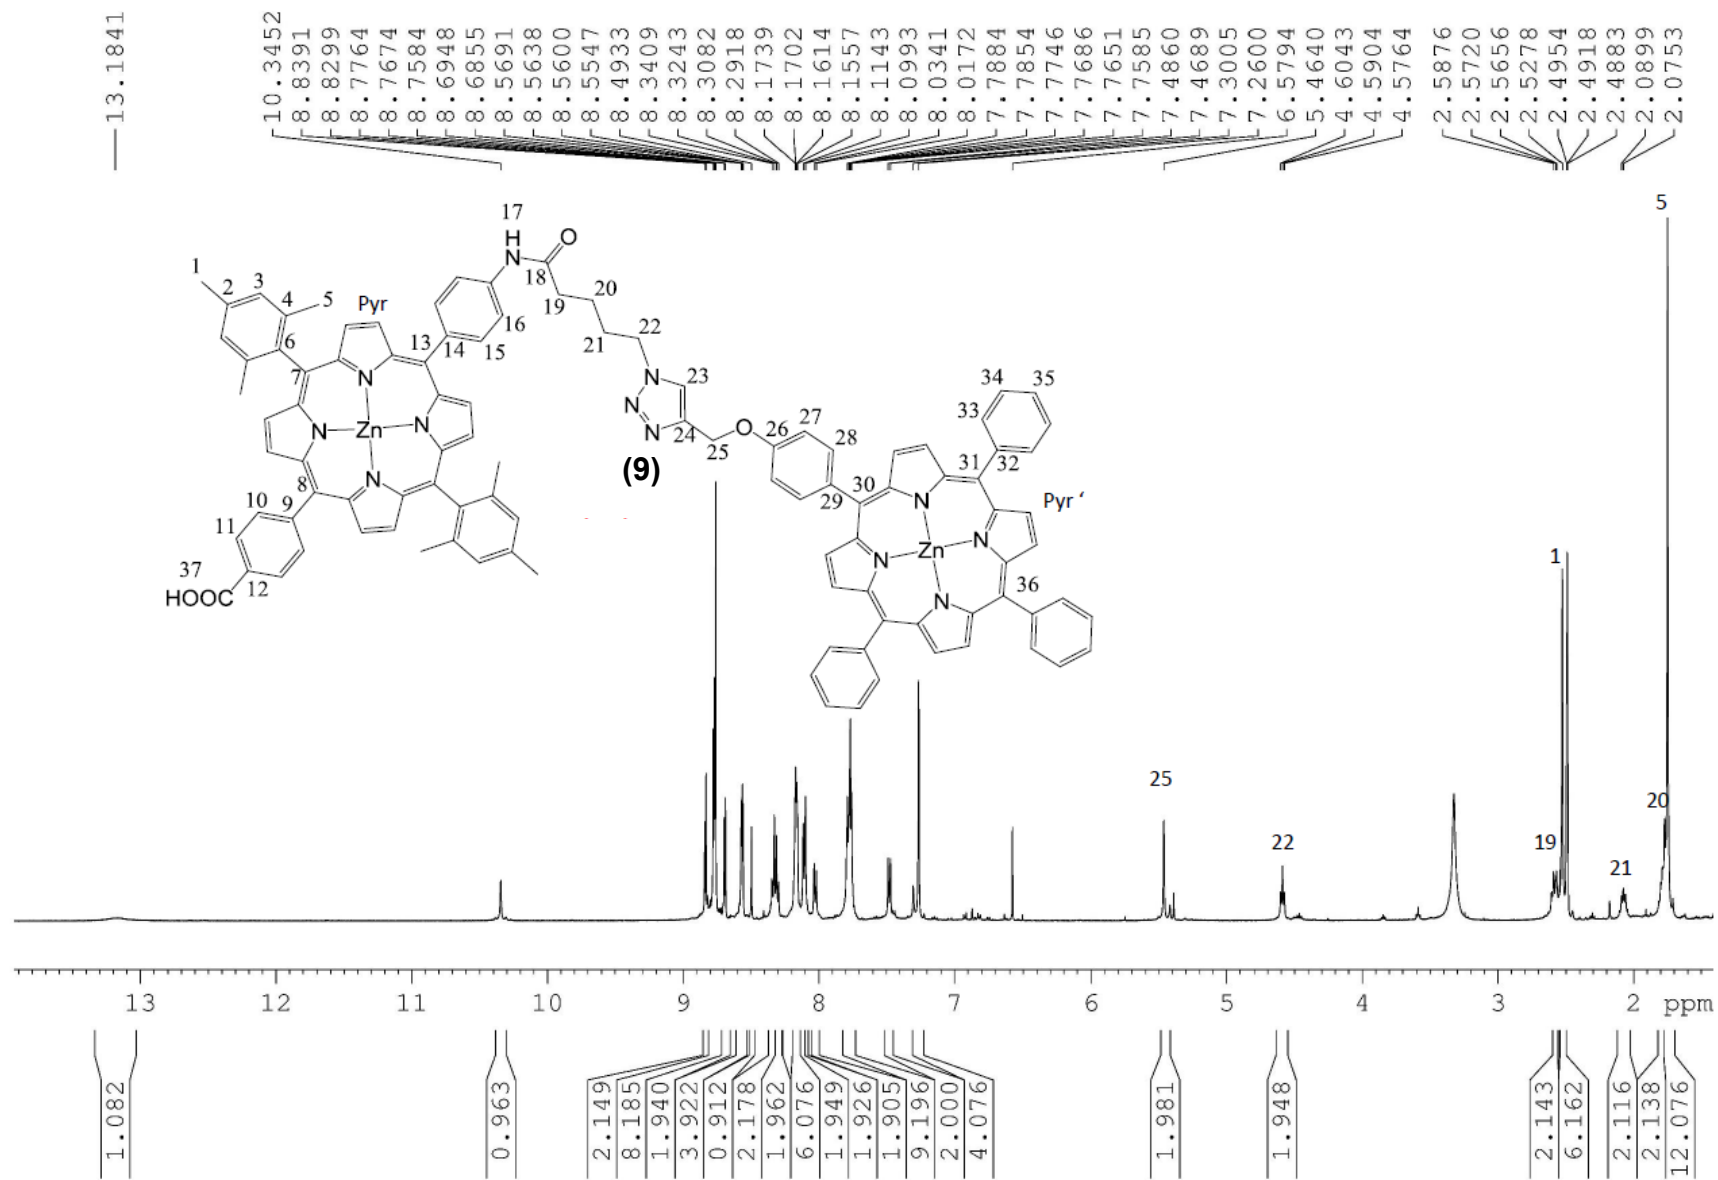

Figure S21: <sup>1</sup>H NMR spectrum of **9** (500MHz, DMSO-d<sub>6</sub>).



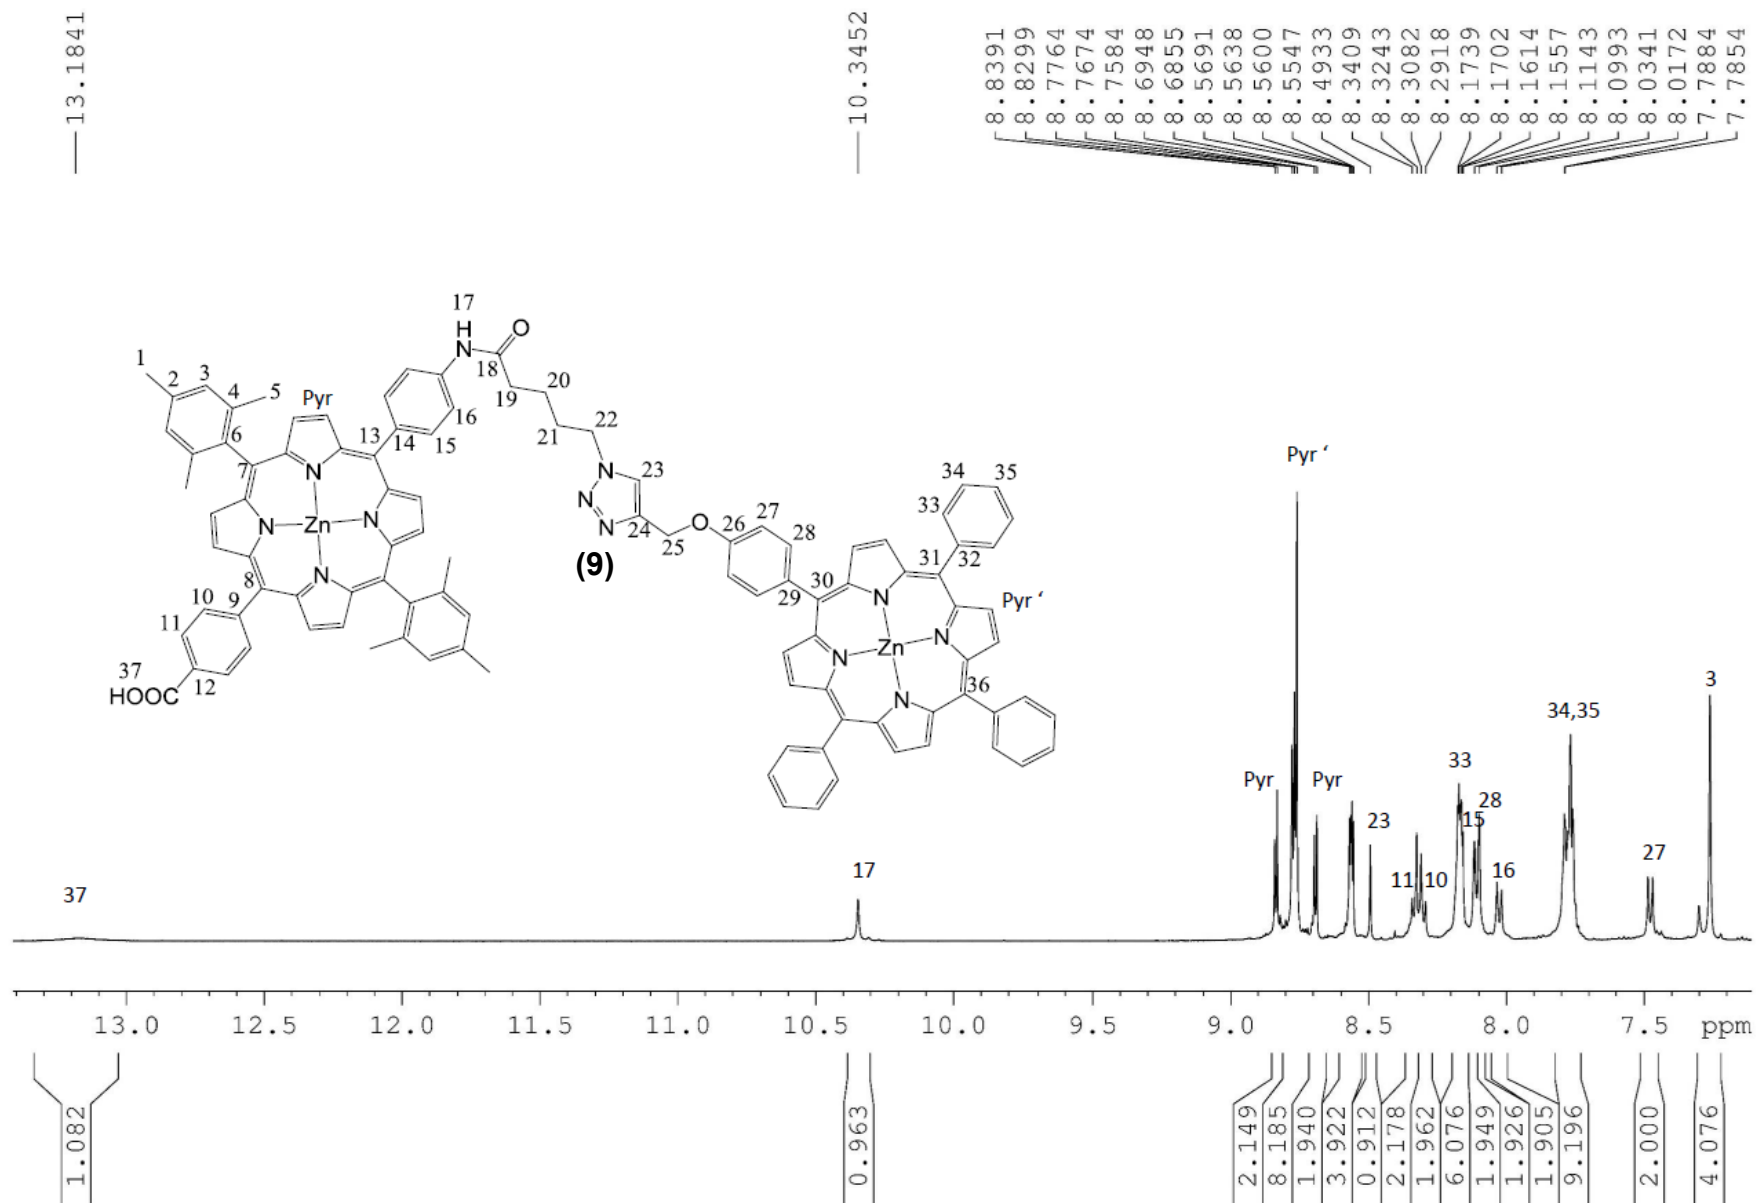

Figure S22: Focus on aromatic region of  $^1\text{H}$  NMR spectrum of **9** (500MHz, DMSO- $d_6$ ).

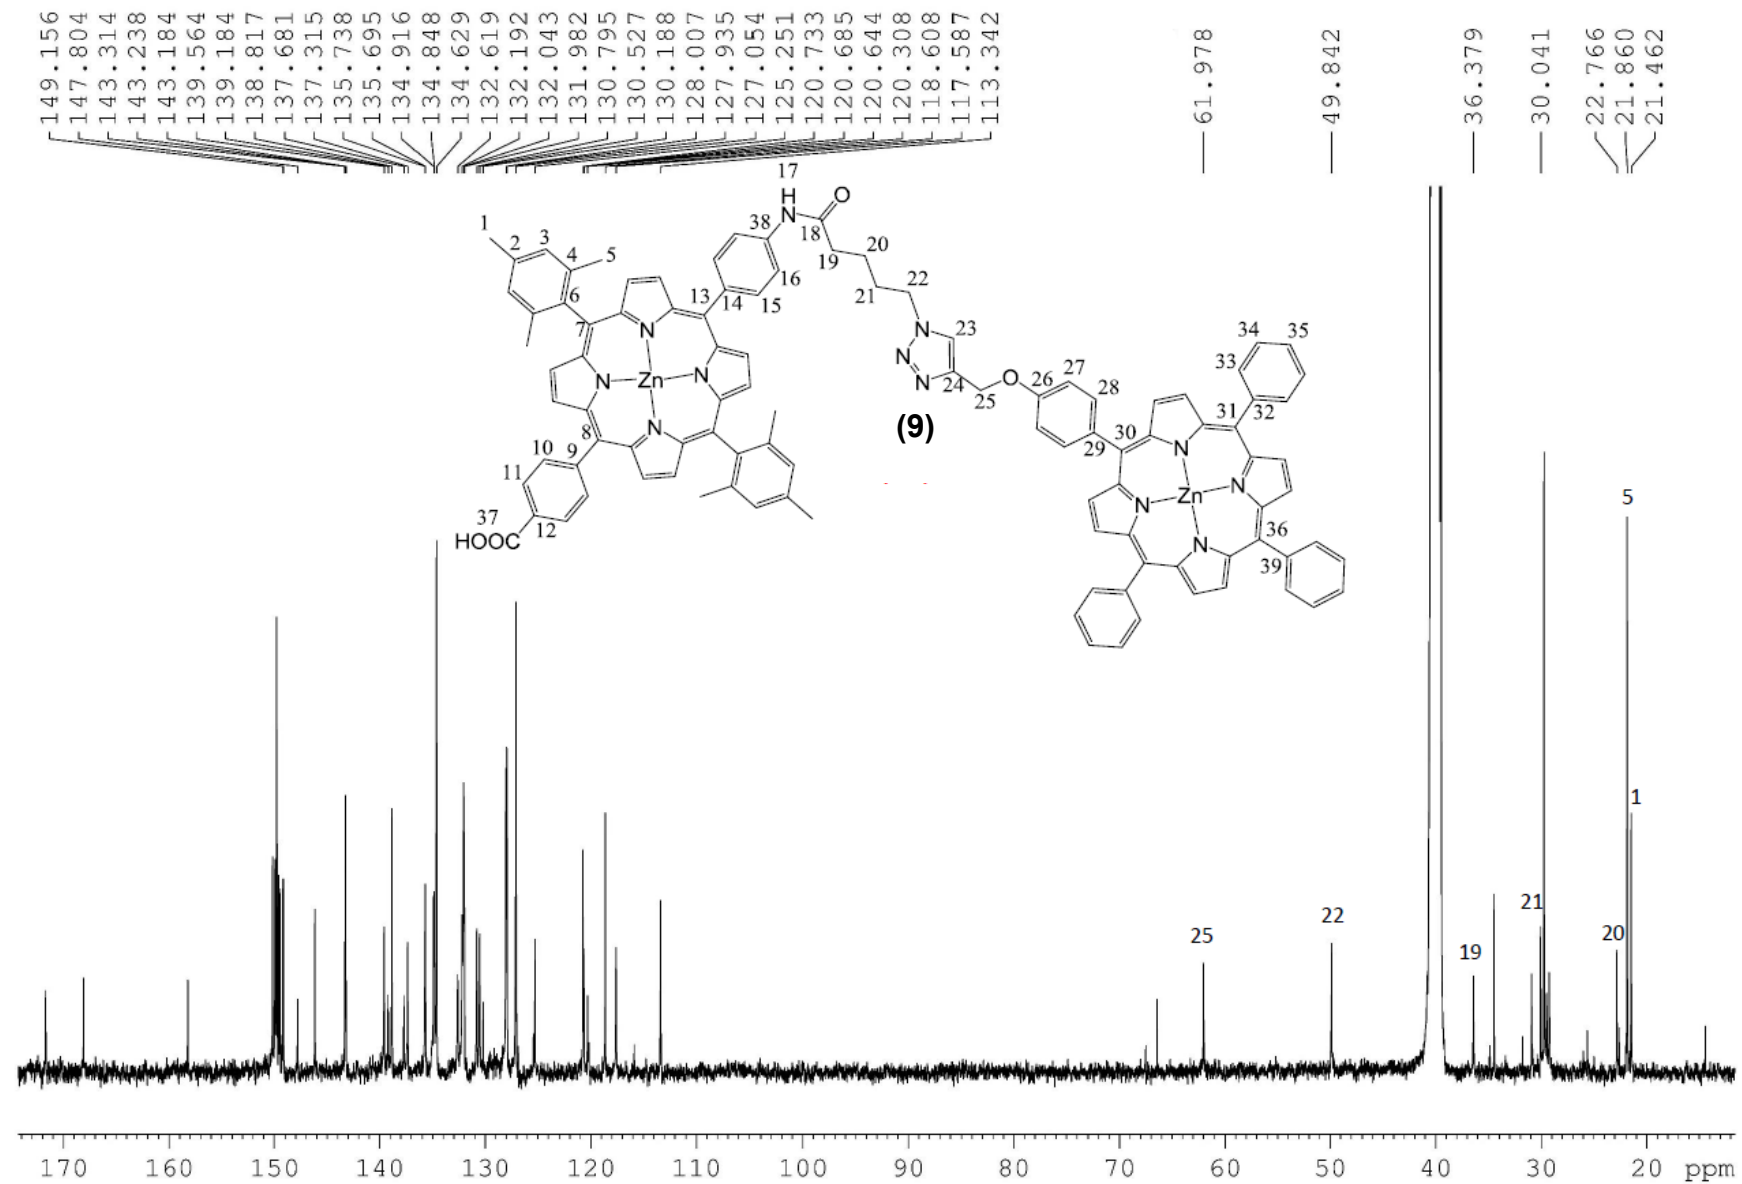

Figure S23: <sup>13</sup>C NMR spectrum of **9** (125MHz, DMSO-d<sup>6</sup>).

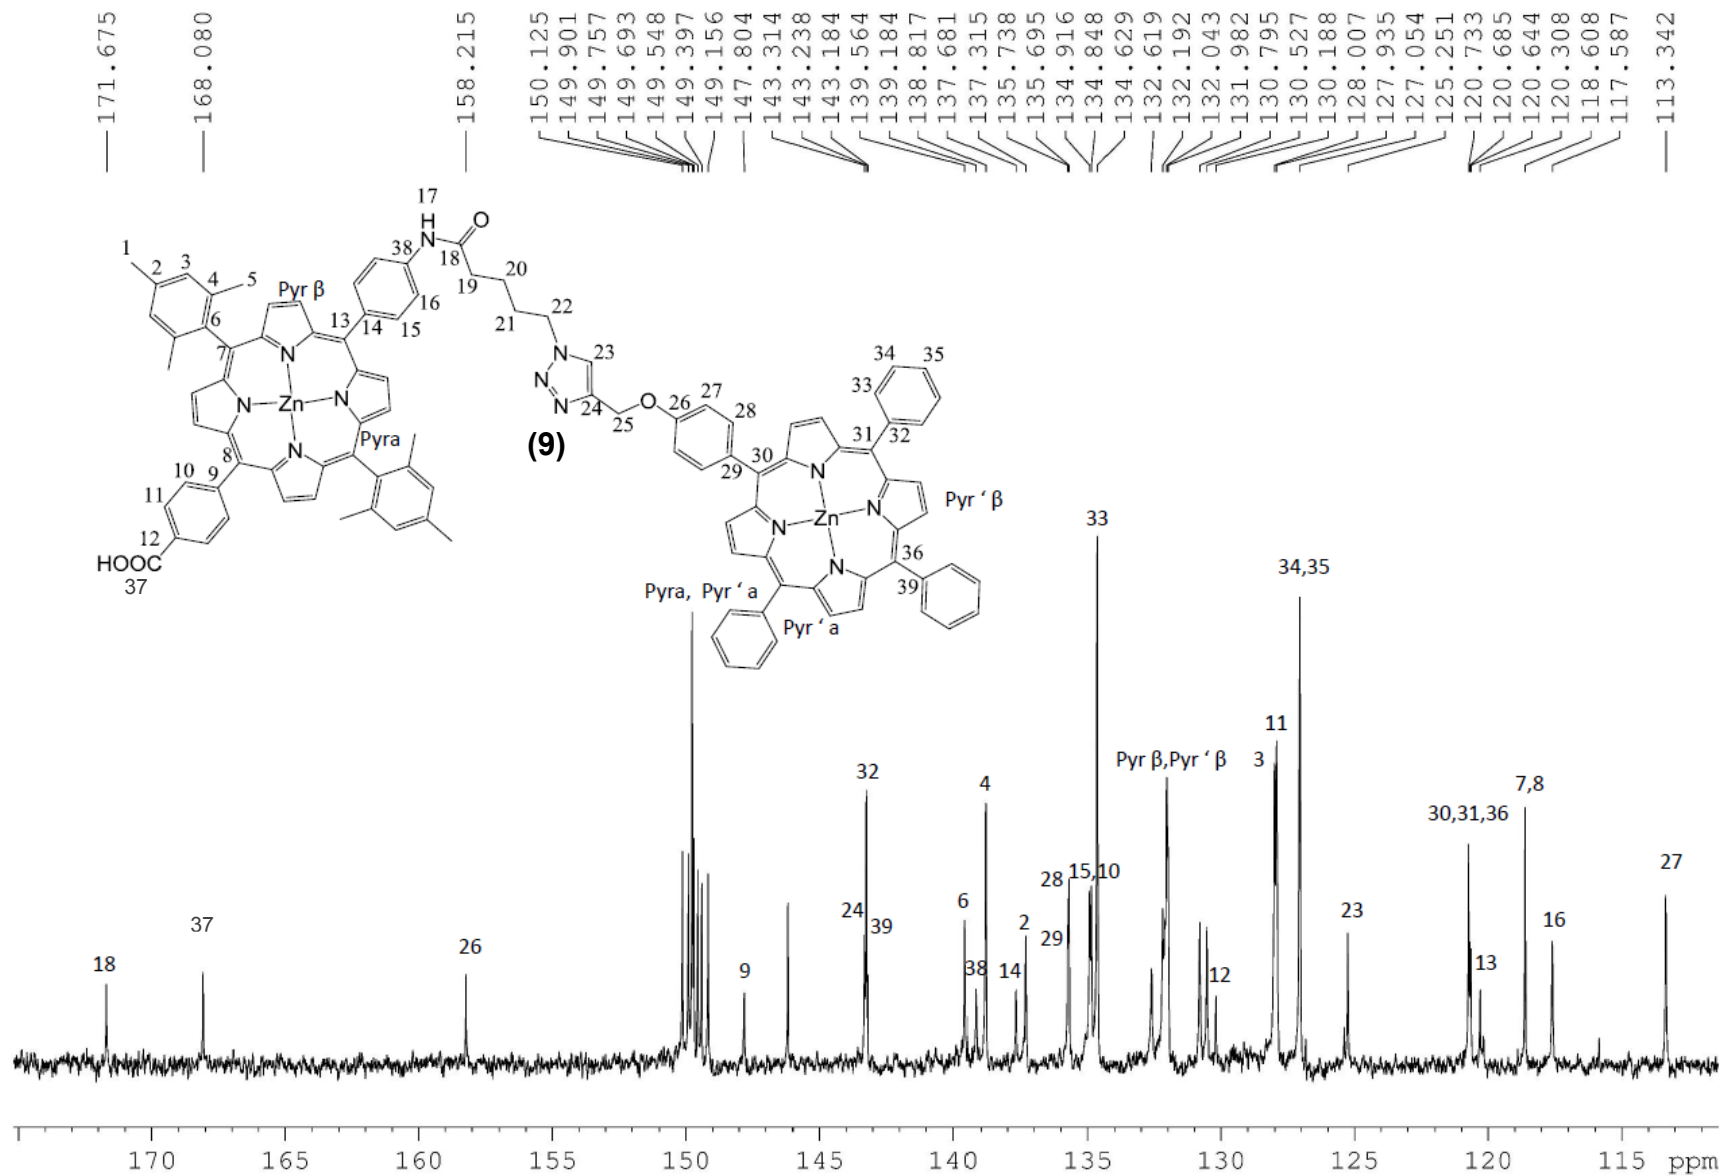

Figure S24: Focus on <sup>13</sup>C NMR spectrum of **9** (125MHz, DMSO-d<sub>6</sub>).

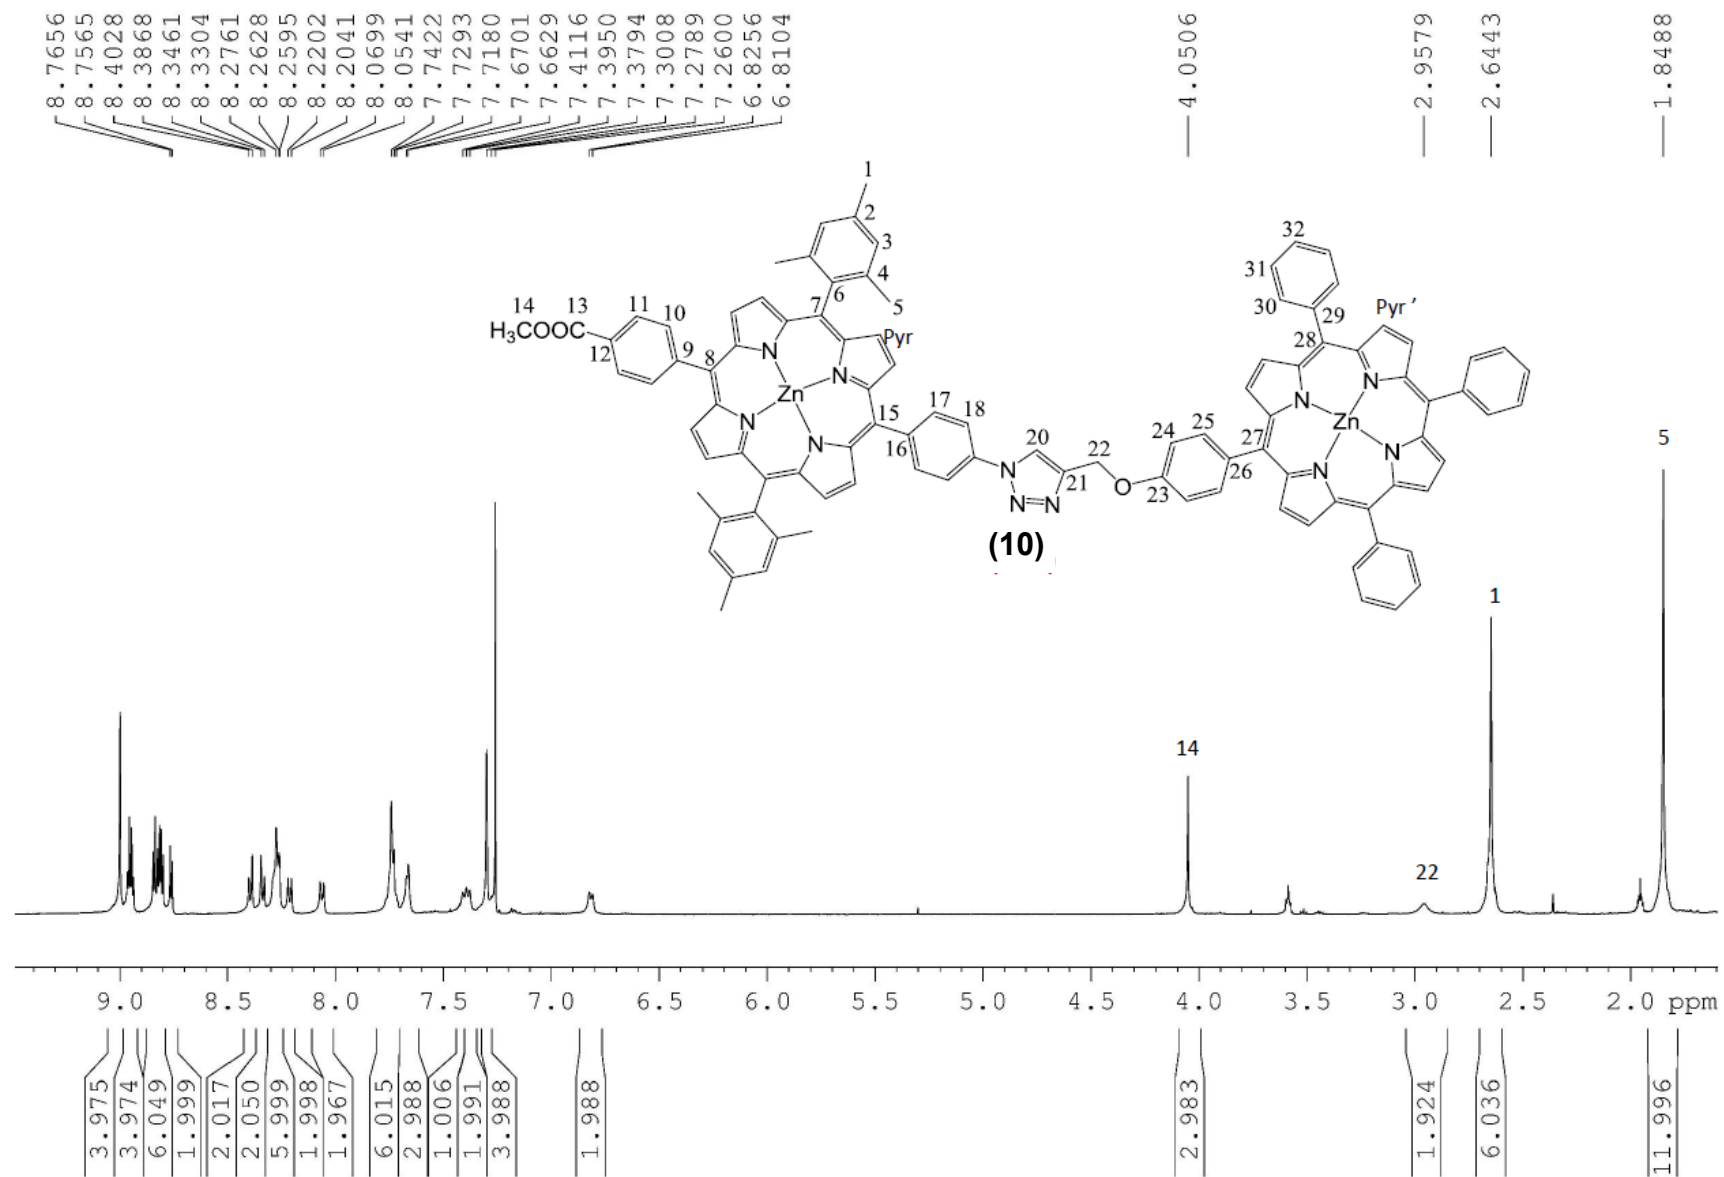

Figure S25: <sup>1</sup>H NMR spectrum of **10** (500MHz, CDCl<sub>3</sub>).

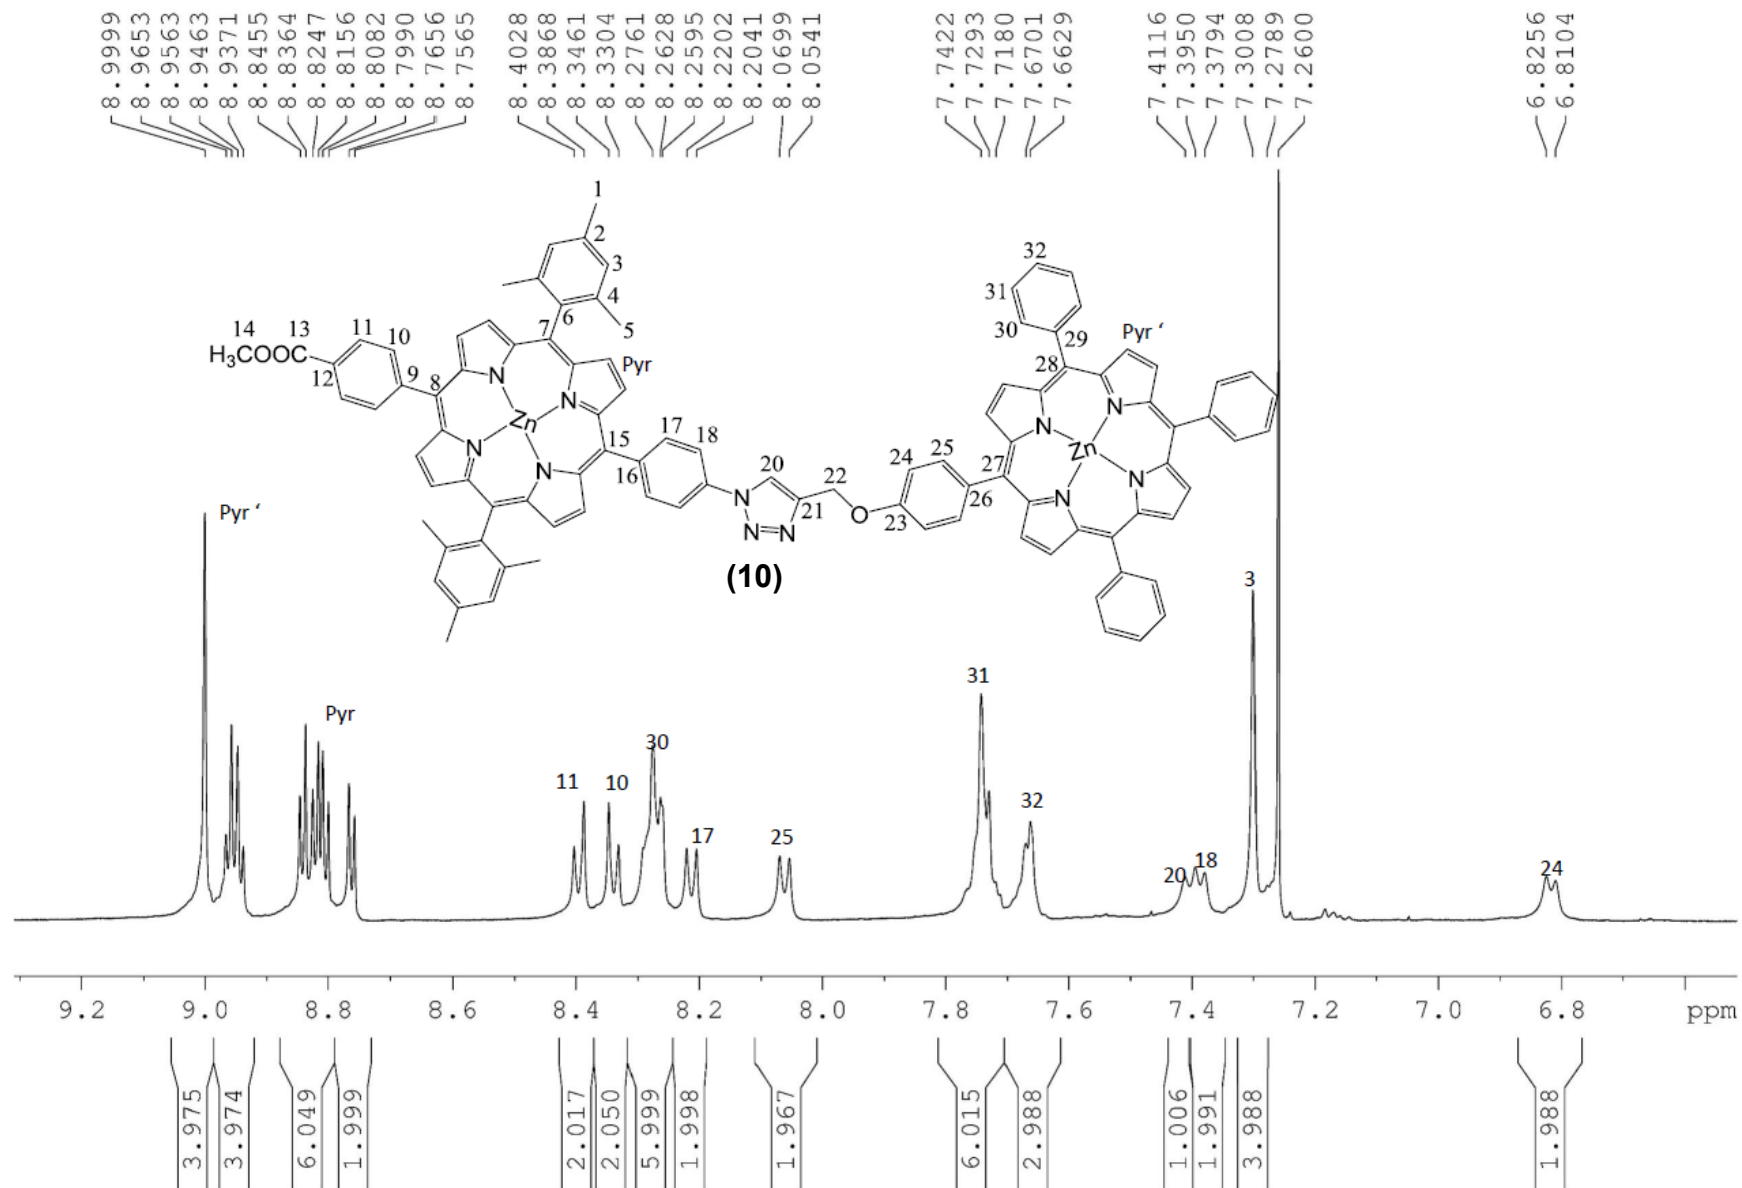

Figure S26: Focus on aromatic region of <sup>1</sup>H NMR spectrum of **10** (500MHz, CDCl<sub>3</sub>).

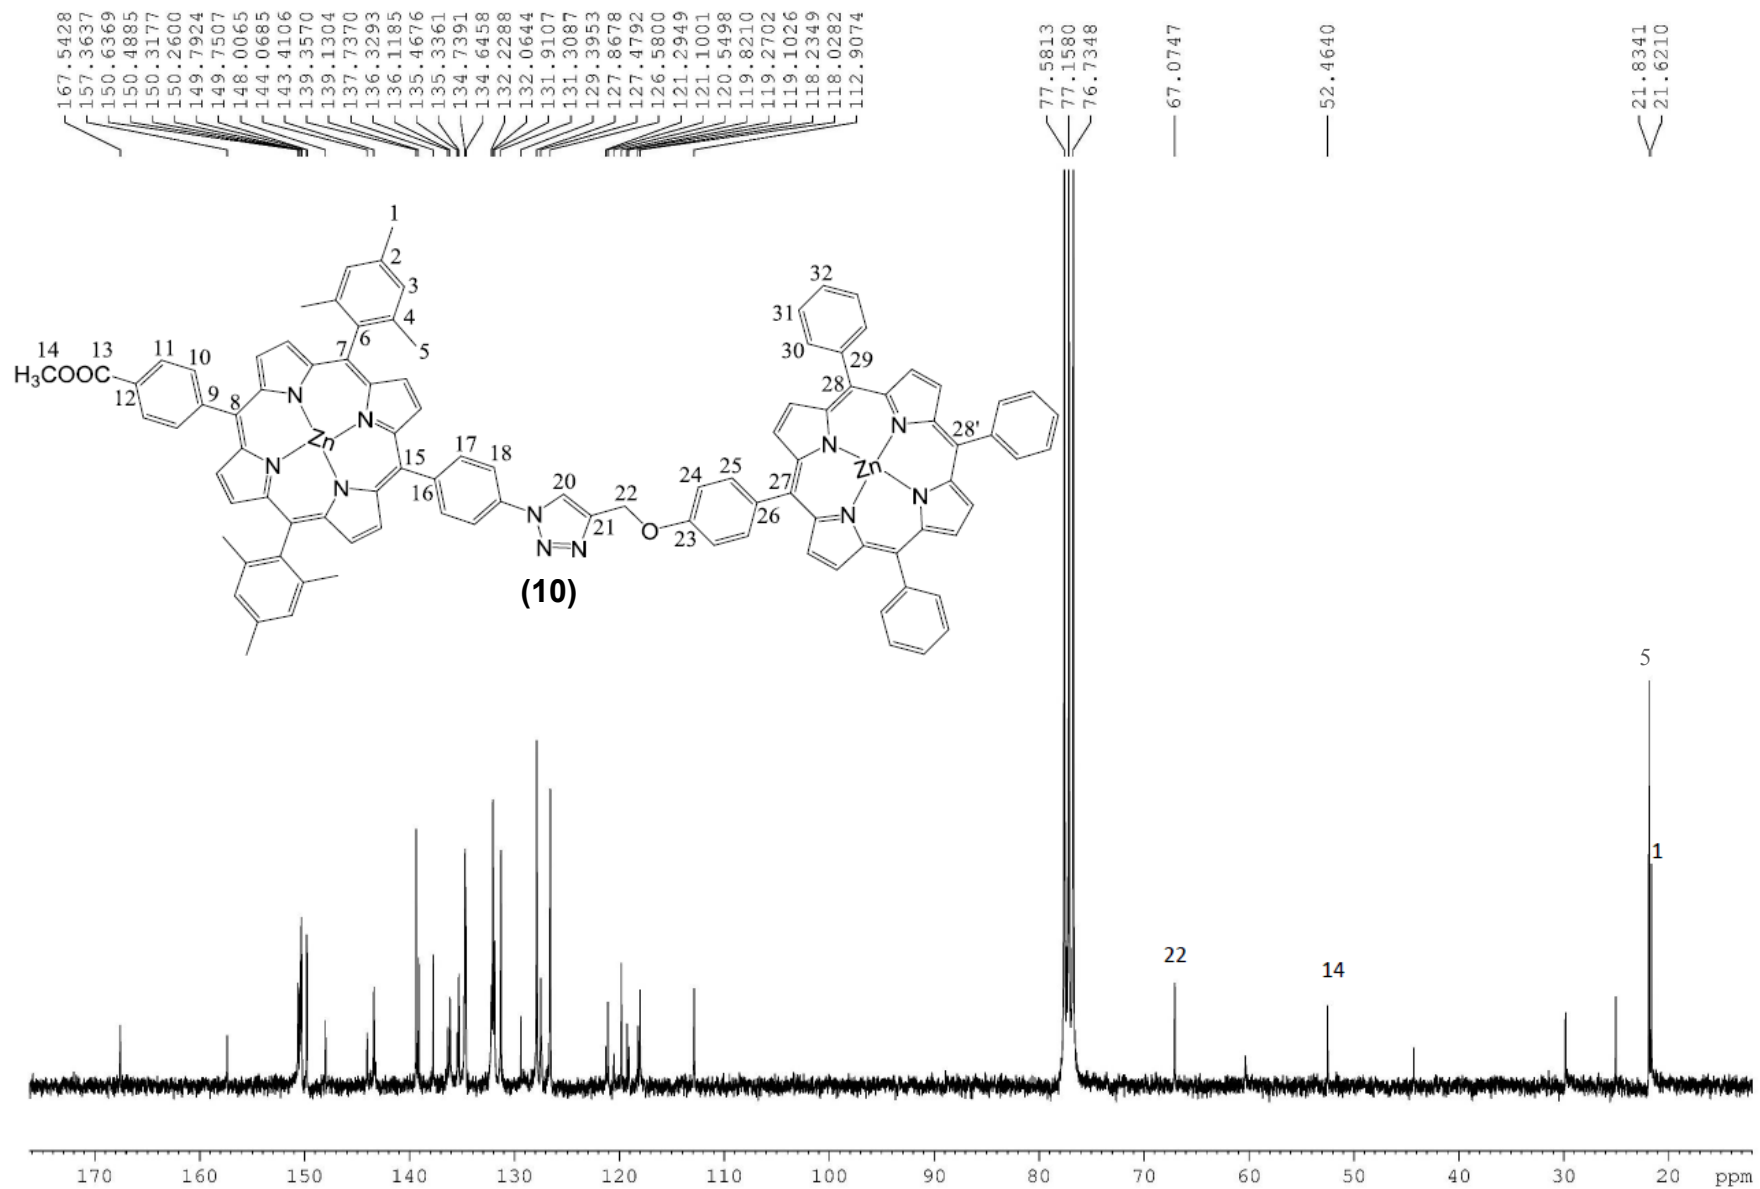

Figure S27: <sup>13</sup>C NMR spectrum of **10** (125MHz, CDCl<sub>3</sub>).

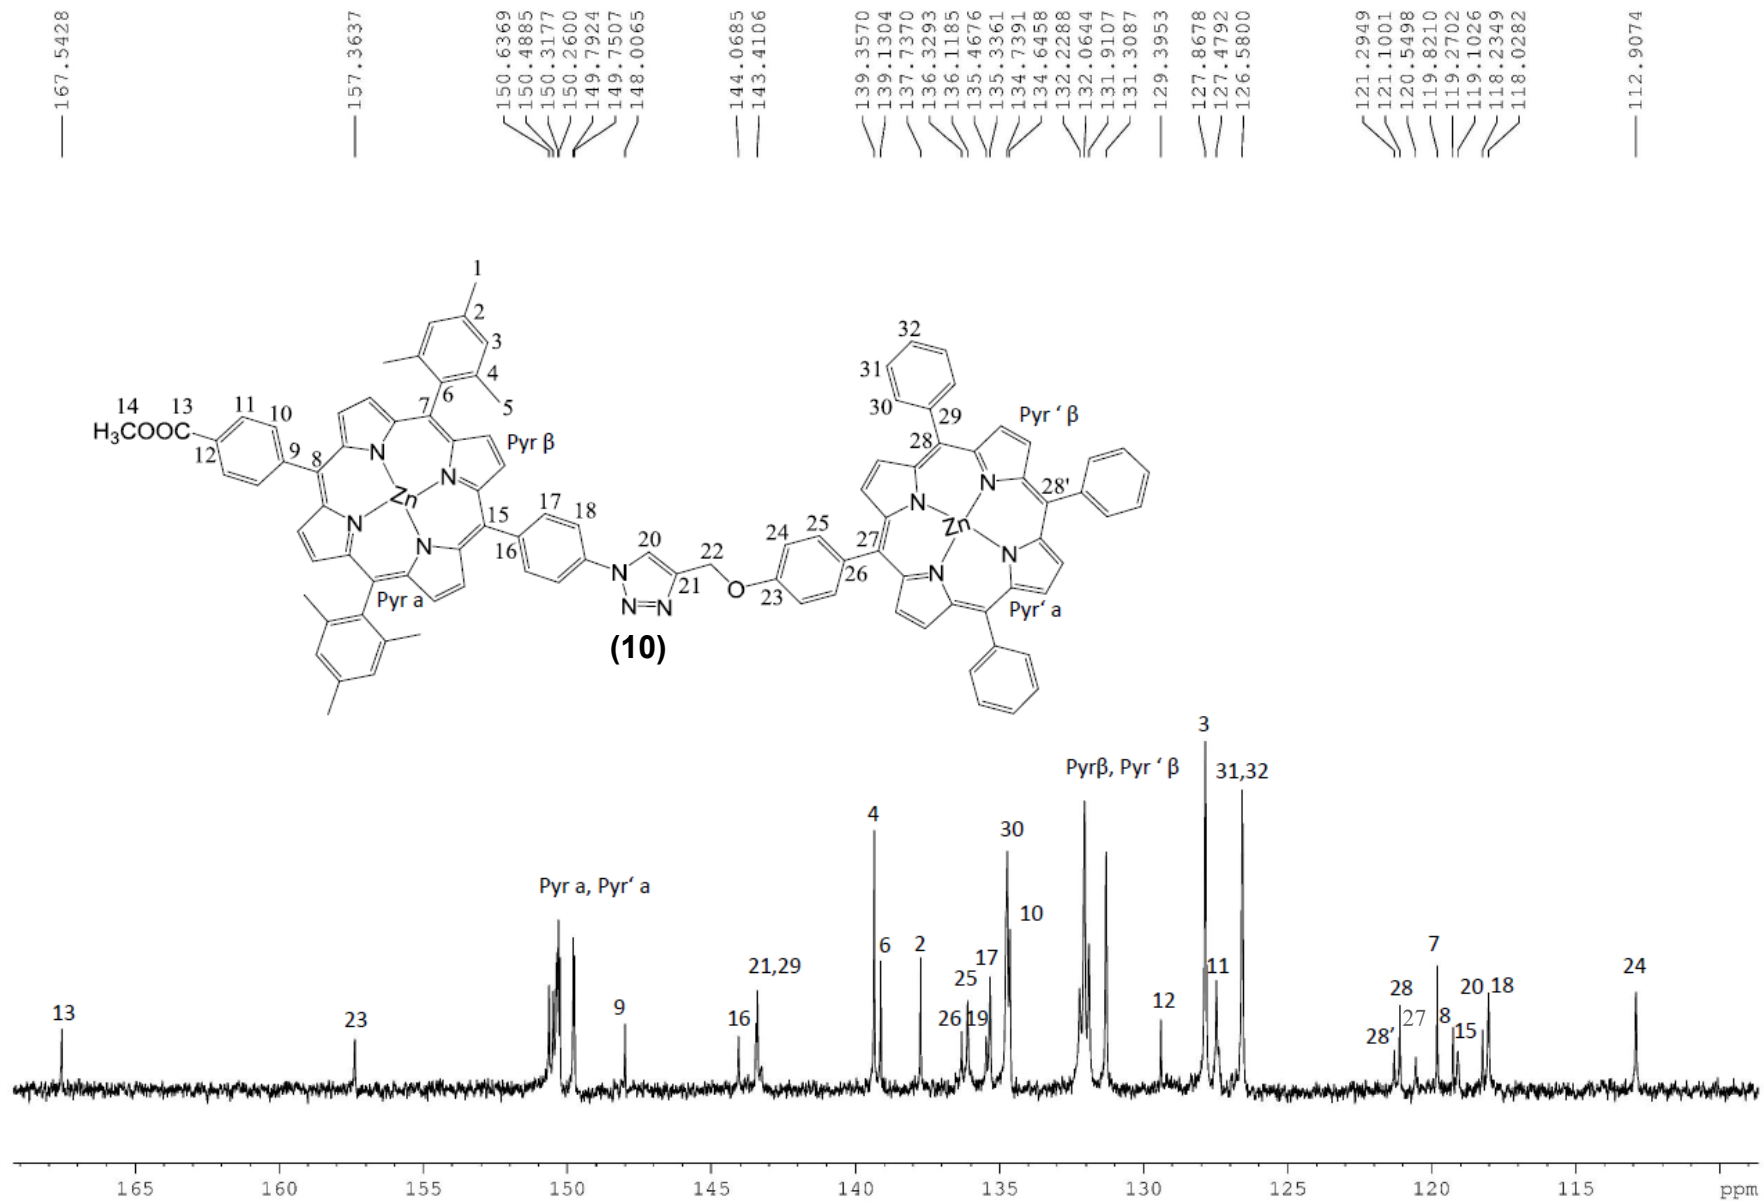

Figure S28: Focus on <sup>13</sup>C NMR spectrum of **10** (125MHz, CDCl<sub>3</sub>).

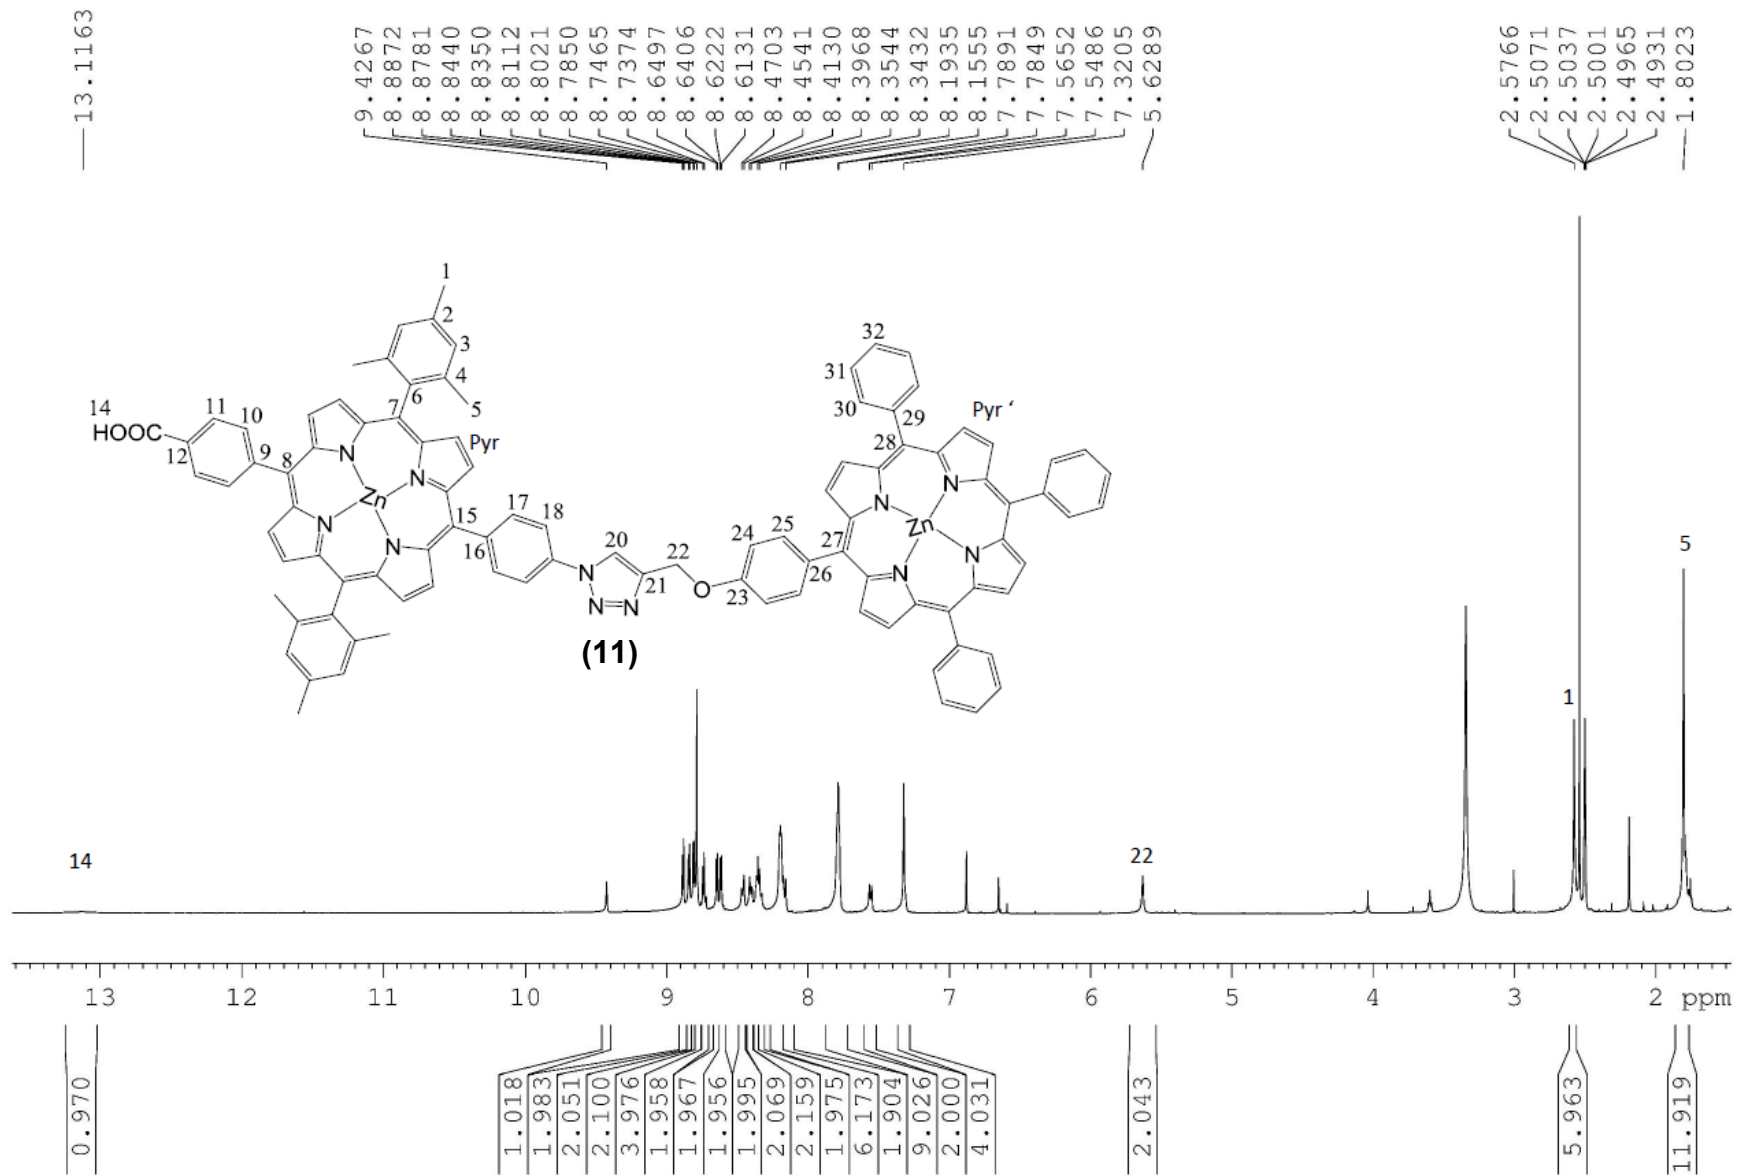

Figure S29:  $^1\text{H}$  NMR spectrum of **11** (500MHz, DMSO- $d_6$ ).



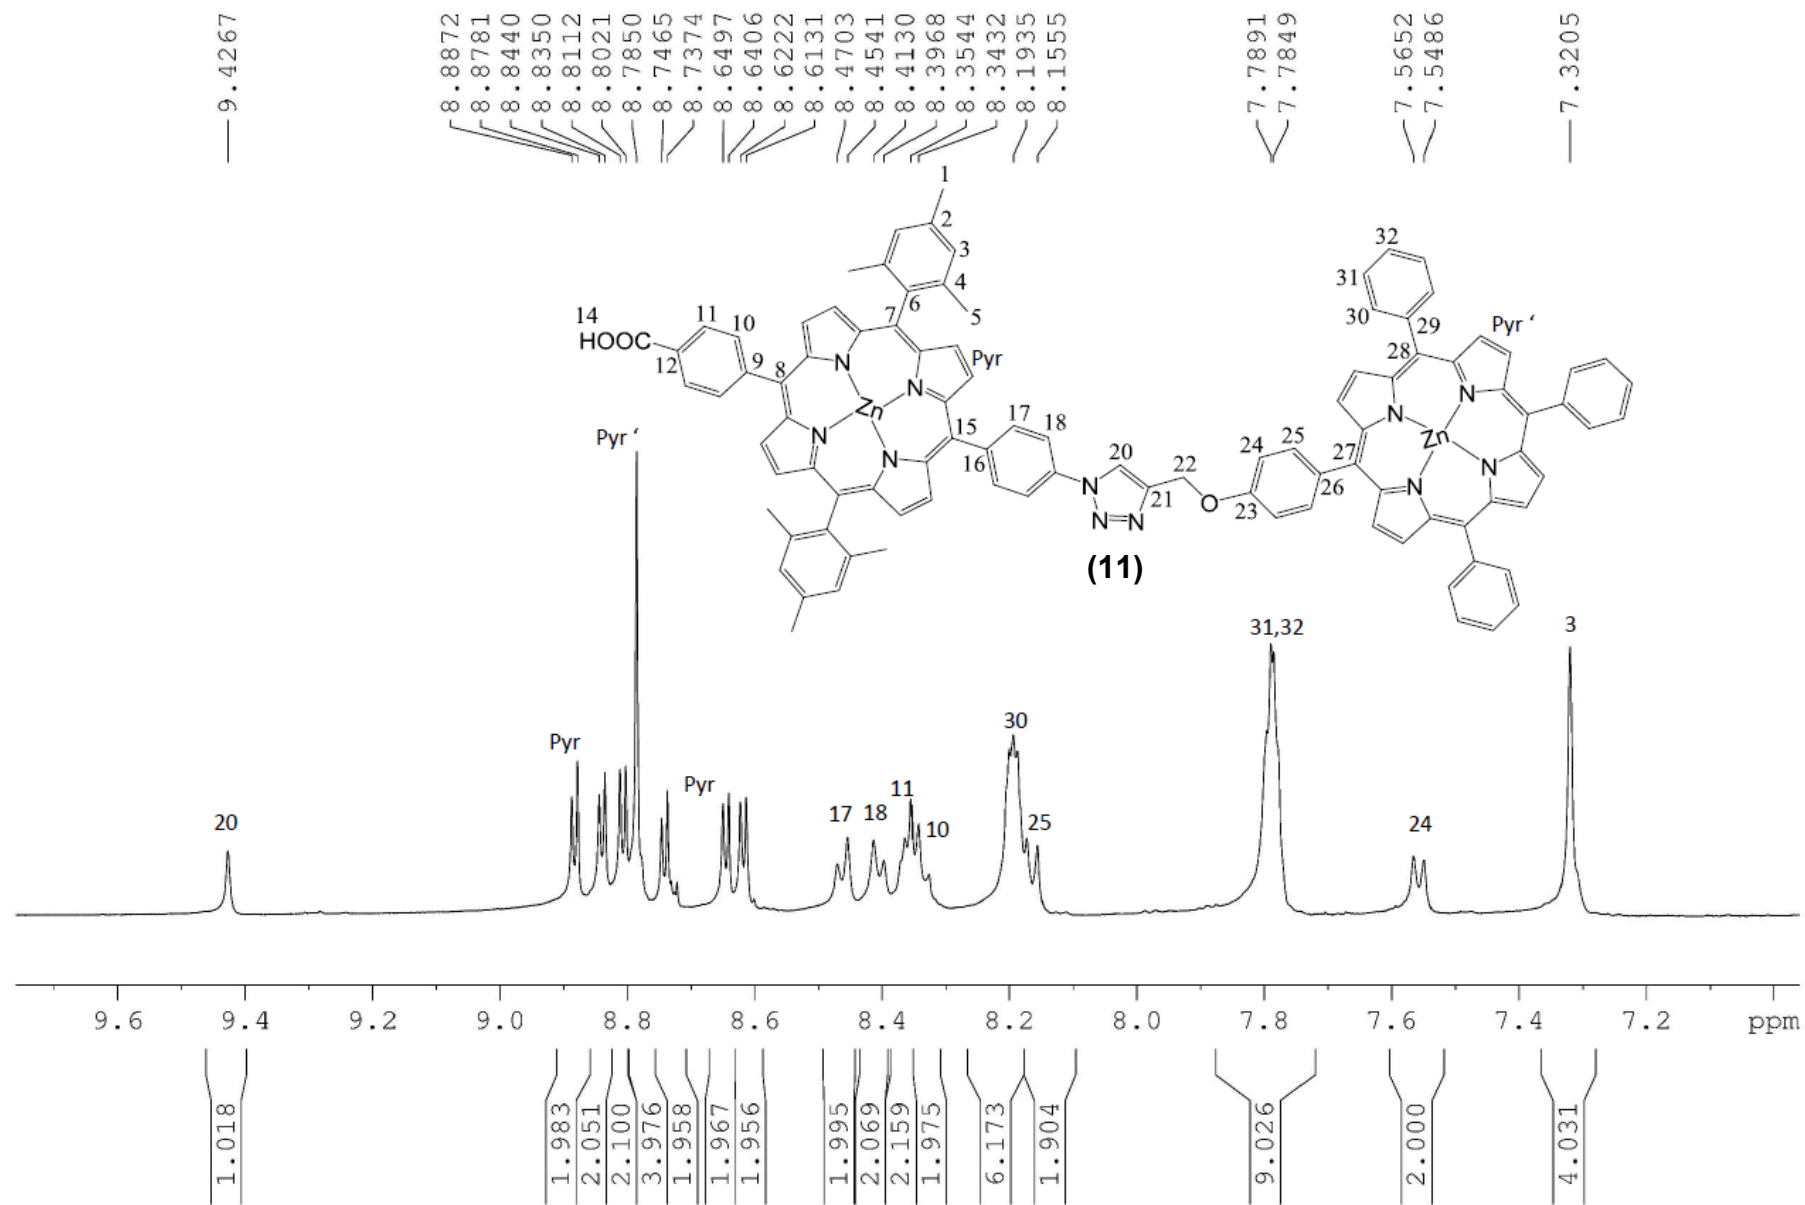

Figure S30: Focus on aromatic region of  $^1\text{H}$  NMR spectrum of **11** (500MHz,  $\text{DMSO-d}_6$ ).

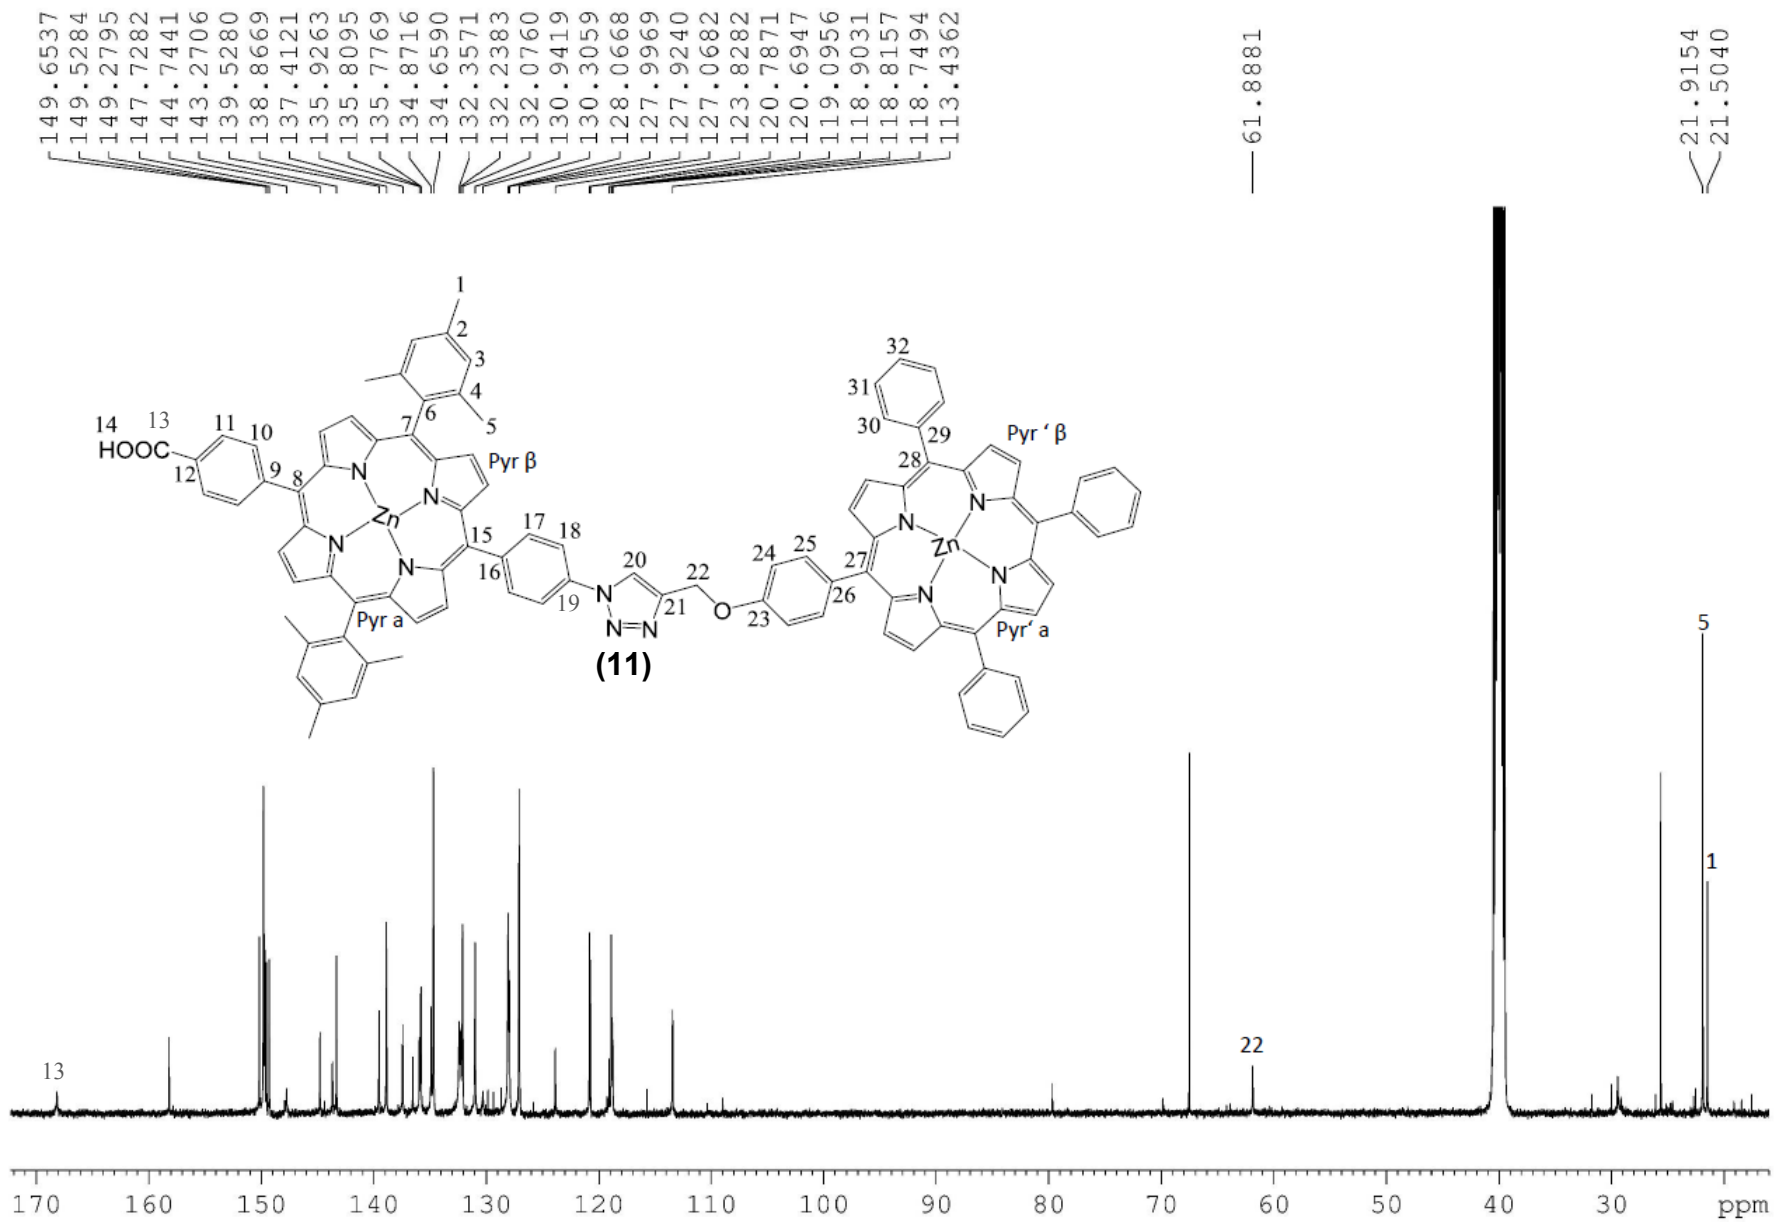

Figure S31:  $^{13}\text{C}$  NMR spectrum of **11** (125MHz,  $\text{DMSO-d}_6$ ). 13 170

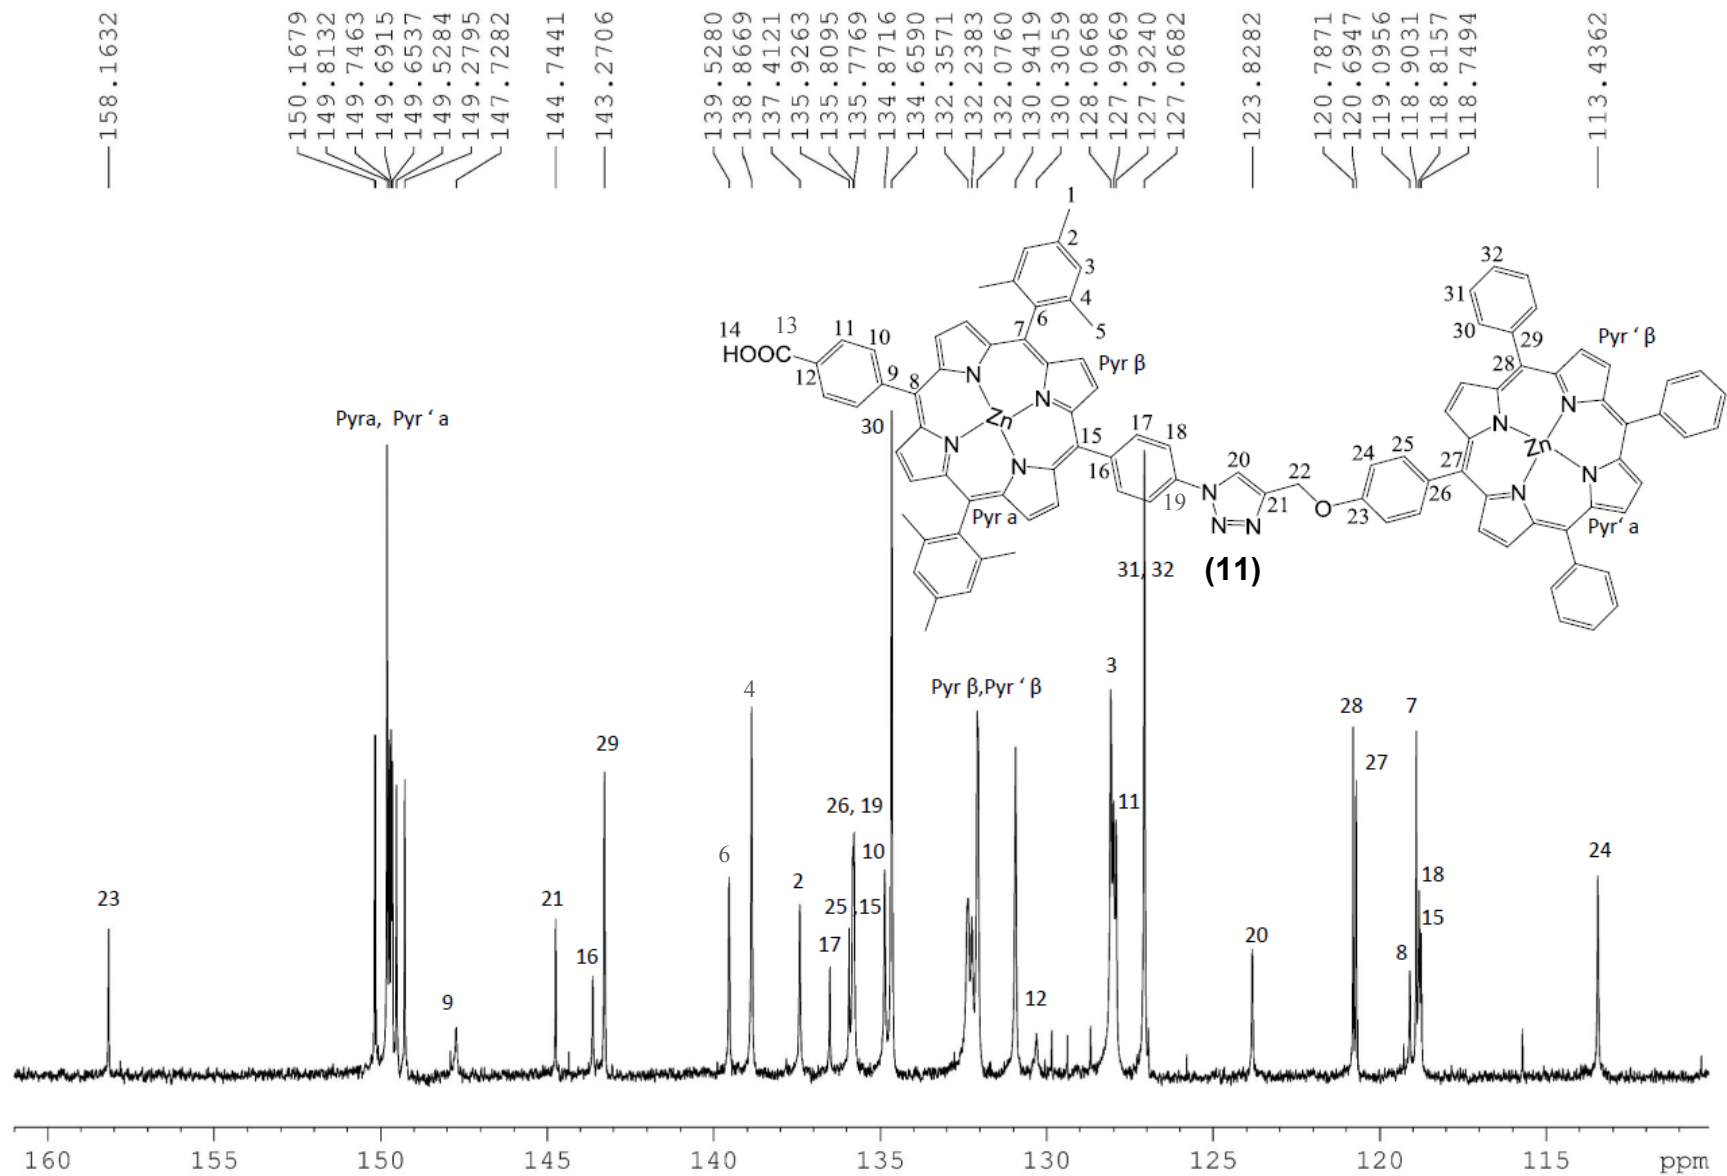

Figure S32: Focus on  $^{13}\text{C}$  NMR spectrum of **11** (125MHz,  $\text{DMSO-d}_6$ ).

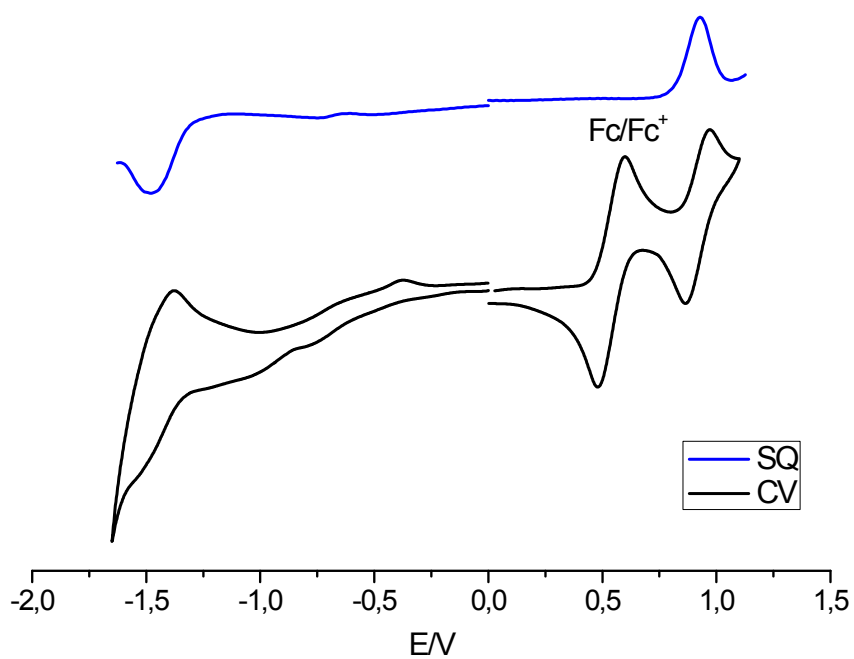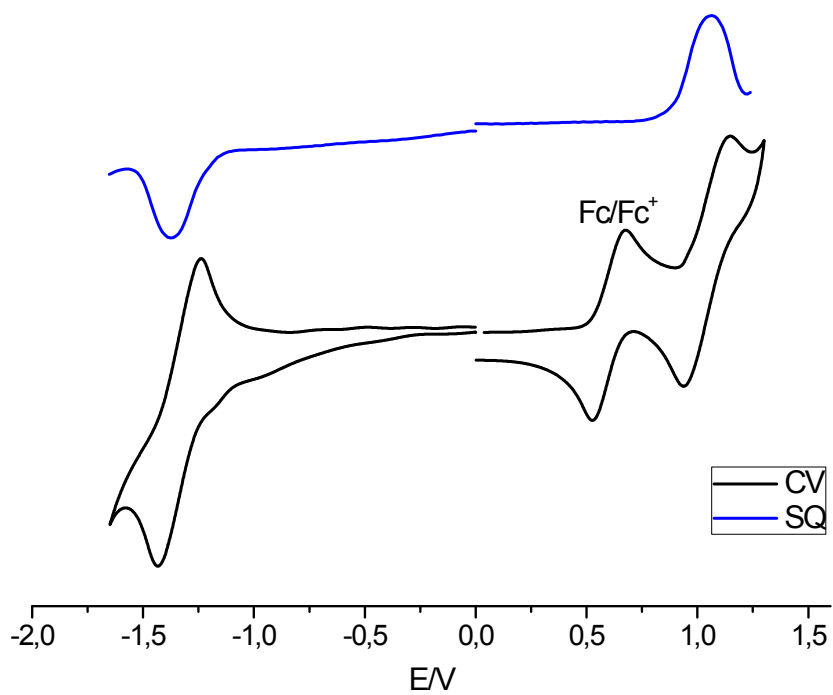

**Figure S33:** Cyclic and Square-wave voltammograms of **9** (upper part) and **11** (lower part).

**Table S1.** Coordinates of gas phase geometry optimized structure of **9** (phenyl and mesityl groups are omitted) calculated by DFT at the B3LYP/LANL2DG/6-31G(d) level. E = -3670.11707528 Hartree / particle.

|    |               |              |               |
|----|---------------|--------------|---------------|
| Zn | -9.822080000  | 9.703813000  | -13.982198000 |
| N  | -9.764780000  | 10.859364000 | -12.269613000 |
| N  | -11.313316000 | 10.902008000 | -14.772318000 |
| C  | -8.980133000  | 10.662673000 | -11.158254000 |
| C  | -9.324920000  | 11.654265000 | -10.156902000 |
| H  | -8.881858000  | 11.728902000 | -9.174514000  |
| C  | -10.304549000 | 12.439959000 | -10.689360000 |
| H  | -10.807739000 | 13.279869000 | -10.226562000 |
| C  | -10.580114000 | 11.934311000 | -12.013208000 |
| C  | -11.543166000 | 12.455966000 | -12.886006000 |
| C  | -11.884255000 | 11.987092000 | -14.158226000 |
| C  | -12.891534000 | 12.556494000 | -15.027805000 |
| H  | -13.498792000 | 13.422030000 | -14.793595000 |
| C  | -12.911741000 | 11.798472000 | -16.162642000 |
| H  | -13.539215000 | 11.923403000 | -17.036408000 |
| C  | -11.917934000 | 10.759230000 | -15.995238000 |
| C  | -8.009158000  | 9.645606000  | -11.005305000 |
| H  | -12.093851000 | 13.321310000 | -12.527188000 |
| C  | -7.232274000  | 9.621671000  | -9.726650000  |
| C  | -7.357800000  | 8.554002000  | -8.818294000  |
| H  | -8.033988000  | 7.736043000  | -9.050299000  |
| C  | -6.646108000  | 8.533859000  | -7.625586000  |
| H  | -6.753102000  | 7.714531000  | -6.921339000  |
| C  | -5.780611000  | 9.589136000  | -7.302348000  |
| C  | -5.636964000  | 10.659595000 | -8.192252000  |
| H  | -4.971801000  | 11.486822000 | -7.972631000  |
| C  | -6.360473000  | 10.664157000 | -9.388088000  |
| H  | -6.237242000  | 11.496846000 | -10.074842000 |
| N  | -9.860577000  | 8.554261000  | -15.702538000 |

|    |               |              |               |
|----|---------------|--------------|---------------|
| N  | -8.347529000  | 8.498331000  | -13.178464000 |
| C  | -10.667501000 | 8.741595000  | -16.795846000 |
| C  | -10.379622000 | 7.723460000  | -17.783827000 |
| H  | -10.871000000 | 7.633380000  | -18.744692000 |
| C  | -9.394241000  | 6.933035000  | -17.266906000 |
| H  | -8.923506000  | 6.070751000  | -17.722622000 |
| C  | -9.072929000  | 7.461133000  | -15.958221000 |
| C  | -8.107792000  | 6.949983000  | -15.085219000 |
| C  | -7.765095000  | 7.429840000  | -13.814884000 |
| C  | -6.726064000  | 6.880831000  | -12.976233000 |
| H  | -6.099670000  | 6.035686000  | -13.233515000 |
| C  | -6.689424000  | 7.634375000  | -11.839712000 |
| H  | -6.023097000  | 7.523100000  | -10.996629000 |
| C  | -7.718129000  | 8.649324000  | -11.965900000 |
| C  | -11.617444000 | 9.760747000  | -16.928517000 |
| H  | -7.552547000  | 6.083548000  | -15.434316000 |
| H  | -12.183022000 | 9.778239000  | -17.856163000 |
| Zn | 6.334589000   | 1.049950000  | 8.174306000   |
| N  | 8.175912000   | 0.137901000  | 8.416083000   |
| N  | 5.838804000   | 0.439326000  | 10.088149000  |
| C  | 9.149031000   | 0.066910000  | 7.449912000   |
| C  | 10.265786000  | -0.701413000 | 7.946728000   |
| H  | 11.168708000  | -0.919931000 | 7.390313000   |
| C  | 9.948696000   | -1.092321000 | 9.214022000   |
| H  | 10.542999000  | -1.696273000 | 9.884311000   |
| C  | 8.632887000   | -0.556542000 | 9.509710000   |
| C  | 7.921145000   | -0.745480000 | 10.715986000  |
| C  | 6.617535000   | -0.264855000 | 10.973991000  |
| C  | 5.898835000   | -0.406499000 | 12.226745000  |
| H  | 6.274694000   | -0.900631000 | 13.110939000  |
| C  | 4.692270000   | 0.208960000  | 12.069186000  |
| H  | 3.895872000   | 0.306090000  | 12.796455000  |

|   |              |              |              |
|---|--------------|--------------|--------------|
| C | 4.661554000  | 0.740656000  | 10.727319000 |
| C | 9.067525000  | 0.631883000  | 6.173734000  |
| C | 8.601034000  | -1.514651000 | 11.804524000 |
| C | 8.101081000  | -2.758429000 | 12.226894000 |
| H | 7.215364000  | -3.164018000 | 11.746871000 |
| C | 8.731590000  | -3.478612000 | 13.238458000 |
| H | 8.338821000  | -4.440317000 | 13.549741000 |
| C | 9.882371000  | -2.965368000 | 13.852658000 |
| C | 10.389275000 | -1.725642000 | 13.440105000 |
| H | 11.276729000 | -1.337003000 | 13.928817000 |
| C | 9.756266000  | -1.010972000 | 12.428512000 |
| H | 10.148618000 | -0.046689000 | 12.119370000 |
| H | 9.928580000  | 0.479481000  | 5.528595000  |
| N | 4.494478000  | 1.963160000  | 7.933366000  |
| N | 6.831238000  | 1.661352000  | 6.261265000  |
| C | 3.523545000  | 2.037758000  | 8.900641000  |
| C | 2.412195000  | 2.816729000  | 8.409110000  |
| H | 1.512002000  | 3.039889000  | 8.968121000  |
| C | 2.731299000  | 3.211809000  | 7.143468000  |
| H | 2.142123000  | 3.823864000  | 6.476271000  |
| C | 4.041422000  | 2.665879000  | 6.842571000  |
| C | 4.747950000  | 2.848990000  | 5.631735000  |
| C | 6.048220000  | 2.358381000  | 5.372578000  |
| C | 6.761339000  | 2.487636000  | 4.115913000  |
| H | 6.379203000  | 2.971316000  | 3.228760000  |
| C | 7.969436000  | 1.874609000  | 4.274041000  |
| H | 8.762528000  | 1.769790000  | 3.544175000  |
| C | 8.005453000  | 1.354847000  | 5.620111000  |
| C | 3.602449000  | 1.467509000  | 10.175620000 |
| C | 4.069205000  | 3.622209000  | 4.546327000  |
| C | 4.580072000  | 4.852723000  | 4.102931000  |
| H | 5.481637000  | 5.252520000  | 4.557933000  |

|   |              |              |              |
|---|--------------|--------------|--------------|
| C | 3.941453000  | 5.575559000  | 3.101066000  |
| H | 4.354356000  | 6.531334000  | 2.783288000  |
| C | 2.765775000  | 5.090697000  | 2.506324000  |
| C | 2.242693000  | 3.860490000  | 2.933215000  |
| H | 1.341307000  | 3.477509000  | 2.476453000  |
| C | 2.895681000  | 3.149319000  | 3.938655000  |
| H | 2.484945000  | 2.194646000  | 4.254928000  |
| H | 2.740865000  | 1.619426000  | 10.820147000 |
| O | -5.134317000 | 9.480895000  | -6.103364000 |
| C | 10.596887000 | -3.687737000 | 14.936002000 |
| O | 11.598423000 | -3.288654000 | 15.497528000 |
| O | 10.017445000 | -4.873501000 | 15.258515000 |
| H | 10.569241000 | -5.248571000 | 15.969833000 |
| N | -3.031038000 | 9.230753000  | -2.545616000 |
| N | -2.734036000 | 10.544327000 | -2.454492000 |
| C | -3.628964000 | 8.953577000  | -3.733350000 |
| C | -3.694590000 | 10.173936000 | -4.370174000 |
| N | -3.139616000 | 11.116736000 | -3.557574000 |
| C | -4.246945000 | 10.524889000 | -5.715007000 |
| H | -3.964303000 | 7.967211000  | -4.011316000 |
| H | -4.771208000 | 11.488359000 | -5.659079000 |
| H | -3.441834000 | 10.627838000 | -6.458230000 |
| N | 2.172431000  | 5.882920000  | 1.499917000  |
| H | 2.671179000  | 6.734672000  | 1.281166000  |
| C | 1.015258000  | 5.658028000  | 0.787231000  |
| O | 0.290173000  | 4.685053000  | 0.946260000  |
| C | 0.702650000  | 6.728339000  | -0.260981000 |
| H | 1.019245000  | 6.327698000  | -1.234617000 |
| H | 1.288146000  | 7.641626000  | -0.092405000 |
| C | -0.796672000 | 7.051628000  | -0.304901000 |
| H | -1.345755000 | 6.106023000  | -0.376351000 |
| H | -1.093854000 | 7.511645000  | 0.647673000  |



|   |              |             |              |
|---|--------------|-------------|--------------|
| C | -1.168030000 | 7.980952000 | -1.465654000 |
| H | -0.910620000 | 7.509170000 | -2.423561000 |
| H | -0.599380000 | 8.917268000 | -1.409845000 |
| C | -2.661981000 | 8.327320000 | -1.459838000 |
| H | -3.276060000 | 7.426947000 | -1.558823000 |
| H | -2.937442000 | 8.821408000 | -0.523437000 |

**Table S2.** Coordinates of gas phase geometry optimized structure of **11** (phenyl and mesityl groups are omitted) calculated by DFT at the B3LYP/LANL2DG/6-31G(d) level. E = -3344.15685811 Hartree / particle.

|    |               |             |              |
|----|---------------|-------------|--------------|
| Zn | -10.919700000 | 2.644190000 | -0.227194000 |
| N  | -9.432534000  | 4.079207000 | -0.272164000 |
| N  | -12.288503000 | 4.046119000 | 0.438312000  |
| C  | -8.111591000  | 3.899126000 | -0.607011000 |
| C  | -7.403559000  | 5.151561000 | -0.421050000 |
| H  | -6.347224000  | 5.302066000 | -0.590313000 |
| C  | -8.315555000  | 6.068816000 | 0.012002000  |
| H  | -8.145777000  | 7.109873000 | 0.257367000  |
| C  | -9.586045000  | 5.389802000 | 0.108276000  |
| C  | -10.780271000 | 5.980466000 | 0.539894000  |
| C  | -12.028074000 | 5.368343000 | 0.692120000  |
| C  | -13.239474000 | 6.018387000 | 1.144807000  |
| H  | -13.320702000 | 7.063724000 | 1.415812000  |
| C  | -14.219851000 | 5.068875000 | 1.156413000  |
| H  | -15.258517000 | 5.186867000 | 1.439335000  |
| C  | -13.615309000 | 3.830818000 | 0.712017000  |
| C  | -7.530907000  | 2.685113000 | -1.041058000 |
| H  | -10.727049000 | 7.036082000 | 0.792451000  |
| C  | -6.075340000  | 2.701128000 | -1.388764000 |
| C  | -5.137928000  | 1.980714000 | -0.625569000 |
| H  | -5.478726000  | 1.411271000 | 0.234452000  |
| C  | -3.785786000  | 1.992719000 | -0.944214000 |
| H  | -3.063677000  | 1.441214000 | -0.349992000 |
| C  | -3.328024000  | 2.730354000 | -2.045299000 |
| C  | -4.241931000  | 3.453333000 | -2.819698000 |
| H  | -3.918879000  | 4.025584000 | -3.681809000 |
| C  | -5.598658000  | 3.431865000 | -2.484160000 |
| H  | -6.301374000  | 3.990141000 | -3.096254000 |
| N  | -12.408690000 | 1.207025000 | -0.203669000 |

|    |               |              |              |
|----|---------------|--------------|--------------|
| N  | -9.542453000  | 1.243968000  | -0.870910000 |
| C  | -13.719196000 | 1.390034000  | 0.157779000  |
| C  | -14.430866000 | 0.135816000  | 0.030828000  |
| H  | -15.481371000 | -0.007877000 | 0.251306000  |
| C  | -13.530980000 | -0.790738000 | -0.410348000 |
| H  | -13.702463000 | -1.839213000 | -0.620318000 |
| C  | -12.261828000 | -0.110266000 | -0.555478000 |
| C  | -11.067780000 | -0.692284000 | -0.991951000 |
| C  | -9.822029000  | -0.071751000 | -1.147789000 |
| C  | -8.631224000  | -0.720828000 | -1.642927000 |
| H  | -8.567718000  | -1.758892000 | -1.944923000 |
| C  | -7.643000000  | 0.219181000  | -1.665227000 |
| H  | -6.621818000  | 0.093424000  | -1.994758000 |
| C  | -8.217918000  | 1.455971000  | -1.170899000 |
| C  | -14.274061000 | 2.603106000  | 0.581051000  |
| H  | -11.110886000 | -1.747704000 | -1.247248000 |
| H  | -15.330385000 | 2.590424000  | 0.835377000  |
| Zn | 10.134920000  | -0.428204000 | 0.257469000  |
| N  | 11.261917000  | -2.145810000 | 0.014352000  |
| N  | 11.594747000  | 0.287454000  | 1.536457000  |
| C  | 10.885012000  | -3.231779000 | -0.736265000 |
| C  | 11.882834000  | -4.268538000 | -0.618979000 |
| H  | 11.836359000  | -5.236089000 | -1.102938000 |
| C  | 12.854584000  | -3.794327000 | 0.211675000  |
| H  | 13.748337000  | -4.306167000 | 0.537798000  |
| C  | 12.463767000  | -2.453062000 | 0.604558000  |
| C  | 13.186859000  | -1.609331000 | 1.477954000  |
| C  | 12.770972000  | -0.324763000 | 1.895627000  |
| C  | 13.531040000  | 0.572952000  | 2.745598000  |
| H  | 14.505347000  | 0.363906000  | 3.162876000  |
| C  | 12.791936000  | 1.709418000  | 2.891868000  |
| H  | 13.045055000  | 2.598757000  | 3.455383000  |

|   |              |              |              |
|---|--------------|--------------|--------------|
| C | 11.580326000 | 1.525974000  | 2.128643000  |
| C | 9.708301000  | -3.331359000 | -1.484994000 |
| C | 14.494220000 | -2.115580000 | 2.000723000  |
| C | 14.670272000 | -2.370039000 | 3.371752000  |
| H | 13.840510000 | -2.203777000 | 4.052375000  |
| C | 15.884576000 | -2.842892000 | 3.862904000  |
| H | 16.004586000 | -3.042141000 | 4.922088000  |
| C | 16.954797000 | -3.070909000 | 2.986865000  |
| C | 16.790748000 | -2.819842000 | 1.617885000  |
| H | 17.629261000 | -2.994778000 | 0.951742000  |
| C | 15.575365000 | -2.348890000 | 1.132247000  |
| H | 15.457060000 | -2.147632000 | 0.071641000  |
| H | 9.562898000  | -4.263743000 | -2.023781000 |
| N | 9.007042000  | 1.289091000  | 0.501410000  |
| N | 8.673858000  | -1.144734000 | -1.019898000 |
| C | 9.385456000  | 2.376201000  | 1.249276000  |
| C | 8.391768000  | 3.416025000  | 1.125504000  |
| H | 8.440995000  | 4.385590000  | 1.605170000  |
| C | 7.421353000  | 2.942692000  | 0.292492000  |
| H | 6.532355000  | 3.458047000  | -0.041129000 |
| C | 7.808431000  | 1.598847000  | -0.094489000 |
| C | 7.083783000  | 0.754149000  | -0.965430000 |
| C | 7.497841000  | -0.532054000 | -1.379408000 |
| C | 6.738336000  | -1.429124000 | -2.230159000 |
| H | 5.764880000  | -1.219322000 | -2.649161000 |
| C | 7.477571000  | -2.565652000 | -2.376918000 |
| H | 7.225305000  | -3.454202000 | -2.942070000 |
| C | 8.688688000  | -2.382602000 | -1.612984000 |
| C | 10.561667000 | 2.475152000  | 1.999433000  |
| C | 5.778623000  | 1.262176000  | -1.492422000 |
| C | 5.604655000  | 1.527504000  | -2.861195000 |
| H | 6.434404000  | 1.365465000  | -3.542660000 |

|   |              |              |              |
|---|--------------|--------------|--------------|
| C | 4.392873000  | 1.994483000  | -3.362197000 |
| H | 4.264488000  | 2.198553000  | -4.418499000 |
| C | 3.325636000  | 2.216321000  | -2.485933000 |
| C | 3.477193000  | 1.972528000  | -1.118006000 |
| H | 2.660678000  | 2.167062000  | -0.429952000 |
| C | 4.692584000  | 1.492566000  | -0.633736000 |
| H | 4.802561000  | 1.296508000  | 0.428601000  |
| H | 10.708245000 | 3.408519000  | 2.536201000  |
| O | -1.981395000 | 2.678258000  | -2.277598000 |
| C | 18.272368000 | -3.574412000 | 3.452869000  |
| O | 19.228677000 | -3.792290000 | 2.734994000  |
| O | 18.320397000 | -3.778122000 | 4.795094000  |
| H | 19.221082000 | -4.104506000 | 4.977896000  |
| N | 2.088943000  | 2.695106000  | -2.997729000 |
| N | 2.048048000  | 3.389389000  | -4.166450000 |
| C | 0.832846000  | 2.565069000  | -2.481183000 |
| C | 0.025447000  | 3.209310000  | -3.387478000 |
| N | 0.804404000  | 3.695524000  | -4.397759000 |
| C | -1.456388000 | 3.412095000  | -3.376304000 |
| H | 0.612875000  | 2.025977000  | -1.575437000 |
| H | -1.696671000 | 4.480593000  | -3.274461000 |
| H | -1.894171000 | 3.064269000  | -4.322731000 |
